# Supplementary material for: Total Synthesis and Structural Reassignment of Laingolide A
Source: MDPI journal article supplement (doi:10.3390/md19050247), 2021-04-27

# Supplementary Information

## Total Synthesis and Structural Reassignment of Laingolide A

Fusong Wu <sup>1</sup>, Tao Zhang <sup>1</sup>, Jie Yu <sup>1</sup>, Yian Guo <sup>1,2,\*</sup> and Tao Ye <sup>1,\*</sup>

### Table of Contents

|                                                                                        |   |
|----------------------------------------------------------------------------------------|---|
| 1. Initial approach via cross metathesis .....                                         | 2 |
| 2. synthesis of <i>ent</i> -8.....                                                     | 4 |
| 3. Comparison of <sup>1</sup> H NMR and <sup>13</sup> C NMR data of laingolide A ..... | 6 |
| 4. References.....                                                                     | 7 |
| 5. NMR spectra .....                                                                   | 8 |

## 1. Initial approach via cross metathesis

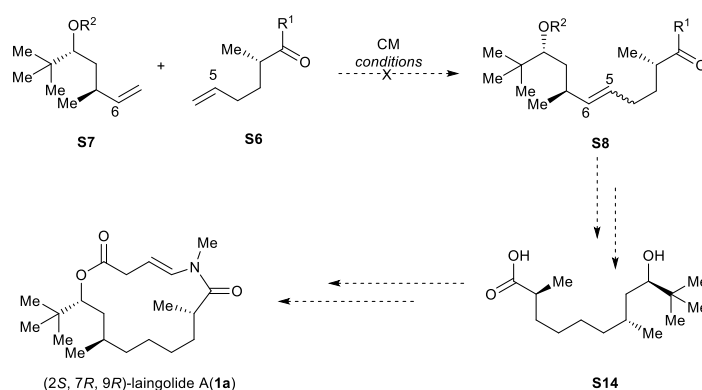

Scheme 1. Initial route towards laingolide A

### Experimental Procedure:

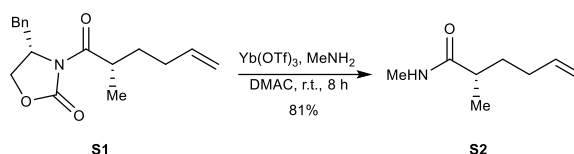

To a solution of MeNH<sub>2</sub> (2 M in THF, 2.6 mL, 5.2 mmol, 3.0 eq.) in dry DMAC (5 mL) was added Yb(OTf)<sub>3</sub> (108 mg, 0.17 mmol, .0.1 eq.) and **S1** [**1**] (500 mg, 1.7 mmol, 1.0 eq.) at room temperature under argon atmosphere. The reaction mixture was allowed to stir at room temperature for 8 h and then quenched with water (20 mL). The aqueous layer was extracted with EtOAc (3 × 30 mL). The combined organic layers were washed with brine, dried over anhydrous sodium sulfate, filtered, and concentrated under reduced pressure. Purification of the crude product was performed by flash column chromatography on silica gel (Hexanes/EtOAc = 5:1) to afford amide **S2** (194 mg, 81%) as a colorless oil.

TLC: R<sub>f</sub> = 0.3 (Hexanes/EtOAc = 3:1), iodine & PMA stain.

[α]<sub>D</sub><sup>25</sup> = +12.1 (c 1.4, CHCl<sub>3</sub>).

<sup>1</sup>H NMR (300 MHz, CDCl<sub>3</sub>) δ 6.25 (s, 1H), 5.70 (ddt, *J* = 16.9, 10.1, 6.6 Hz, 1H), 5.04 – 4.78 (m, 2H), 2.72 (d, *J* = 4.7 Hz, 3H), 2.42 – 2.09 (m, 1H), 2.04 – 1.89 (m, 2H), 1.84 – 1.57 (m, 1H), 1.49 – 1.28 (m, 1H), 1.06 (d, *J* = 6.8 Hz, 3H).

<sup>13</sup>C NMR (75 MHz, CDCl<sub>3</sub>) δ 177.2, 138.2, 114.8, 40.5, 33.3, 31.6, 26.1, 17.9.

HRMS (ESI) calculated for C<sub>8</sub>H<sub>15</sub>NONa<sup>+</sup> [M+Na]<sup>+</sup> 164.1046, found 164.1049.

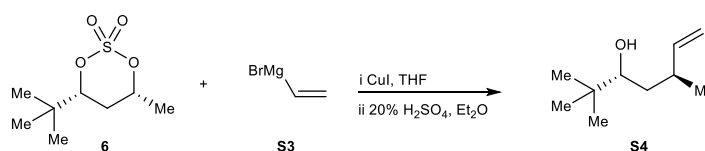

Table S1. Optimization of Cu-mediated vinylation

| Entry | <b>S3</b> | CuI        | Temperature | yield |
|-------|-----------|------------|-------------|-------|
| 1     | 5 equiv.  | 1.2 equiv. | -20 °C      | trace |

|   |          |             |             |       |
|---|----------|-------------|-------------|-------|
| 2 | 5 equiv. | 1.2 equiv.  | -20 °C~r.t. | trace |
| 3 | 5 equiv. | 1.2 equiv.  | 0 °C~r.t.   | trace |
| 4 | 3 equiv. | 1.2 equiv.  | 0 °C~r.t.   | trace |
| 5 | 5 equiv. | 0.6 equiv.  | 0 °C~r.t.   | 10%   |
| 6 | 5 equiv. | 0.05 equiv. | 0 °C~r.t.   | 20%   |
| 7 | 5 equiv. | 0.1 equiv.  | 0 °C~r.t.   | 40%   |
| 8 | 5 equiv. | 0.2 equiv.  | 0 °C~r.t.   | 35%   |

To a solution of cyclic sulfate **6** [2] (100 mg, 0.48 mmol, 1.0 eq.) and CuI in dry THF (1 mL) was add vinylmagnesium bromide (1.0 M in THF) under argon atmosphere. The purple-colored reaction mixture was allowed to stir until the cyclic sulfate **6** was consumed completely and then concentrated in *vacuo*. The solid residue was redissolved in Et<sub>2</sub>O (5 mL) and treated with 20% aqueous H<sub>2</sub>SO<sub>4</sub> (1.5 mL) solution. The contents of the flask were then stirred vigorously for another 12 h before the phases were separated. The aqueous layer was extracted with Et<sub>2</sub>O (3 × 10 mL). The combined organic layers were dried over anhydrous sodium sulfate, filtered, and concentrated under reduced pressure. Purification of the crude product was performed by flash column chromatography on silica gel (Hexanes/EtOAc = 20:1) to afford alcohol **S4** as a colorless oil.

**TLC:** R<sub>f</sub> = 0.6 (Hexanes/EtOAc = 10:1), iodine & PMA stain.

[α]<sub>D</sub><sup>25</sup> = +13.7 (c 1.0, CHCl<sub>3</sub>).

**<sup>1</sup>H NMR** (400 MHz, CDCl<sub>3</sub>) δ 5.70 – 5.53 (m, 1H), 5.02 (dd, *J* = 17.3, 1.8 Hz, 1H), 5.00 – 4.91 (m, 1H), 3.22 (dd, *J* = 10.3, 2.3 Hz, 1H), 2.79 – 2.28 (m, 1H), 1.51 (s, 1H), 1.40 – 1.27 (m, 2H), 1.03 (d, *J* = 6.8 Hz, 3H), 0.87 (s, 9H).

**<sup>13</sup>C NMR** (100 MHz, CDCl<sub>3</sub>) δ 144.2, 113.8, 77.3, 38.6, 35.3, 34.8, 25.8, 21.8.

**HRMS** (ESI) calculated for C<sub>10</sub>H<sub>20</sub>ONa<sup>+</sup> [*M*+Na]<sup>+</sup> 179.1406, found 179.1410

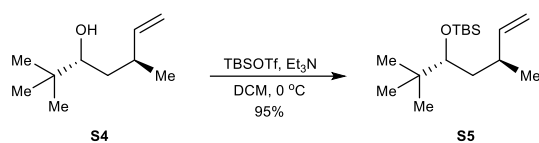

To a solution of alcohol **S4** (180 mg, 1.15 mmol, 1.0 eq.) in dry DCM (5 mL, 0.23 M) was added Et<sub>3</sub>N (2.3 mmol, 0.32 mL, 2.0 eq.) and TBSOTf (1.38 mmol, 0.32 mL, 1.2 eq.) at 0 °C. The reaction mixture was allowed to stir at 0 °C for 2 h before it was diluted with DCM (5 mL) and quenched with saturated aqueous solution of NH<sub>4</sub>Cl (5 mL). The aqueous layer was extracted with DCM (3 × 10 mL). The combined organic layers were washed with brine (10 mL), dried over anhydrous sodium sulfate, filtered, and concentrated under reduced pressure. Purification of the crude product was performed by flash chromatography on silica gel (Hexanes) to afford silyl ether **S5** (295 mg, 95%) as a colorless oil.

**TLC:** R<sub>f</sub> = 0.95 (Hexanes), iodine & PMA stain.

[α]<sub>D</sub><sup>25</sup> = +8.6 (c 1.0, CHCl<sub>3</sub>).

**<sup>1</sup>H NMR** (400 MHz, CDCl<sub>3</sub>) δ 5.60 (ddd, *J* = 17.3, 10.3, 8.0 Hz, 1H), 5.02 – 4.97 (m, 1H), 4.95 (ddd, *J* = 10.4, 1.9, 0.8 Hz, 1H), 3.26 (dd, *J* = 7.5, 1.9 Hz, 1H), 2.38 – 2.27 (m, 1H), 1.50 (ddd, *J* = 14.3, 10.6,

1.9 Hz, 1H), 1.28 (ddd,  $J = 14.3, 7.5, 3.5$  Hz, 1H), 1.00 (d,  $J = 6.7$  Hz, 3H), 0.90 (s, 9H), 0.84 (s, 9H), 0.08 (s, 3H), 0.05 (s, 3H).

$^{13}\text{C}$  NMR (100 MHz,  $\text{CDCl}_3$ )  $\delta$  144.8, 113.3, 78.9, 41.0, 35.8, 35.3, 26.4, 26.4, 22.2, 18.7, -3.0, -3.6.

HRMS (ESI) calculated for  $\text{C}_{16}\text{H}_{34}\text{OSiNa}^+$   $[\text{M}+\text{Na}]^+$  293.2271, found 293.2275.

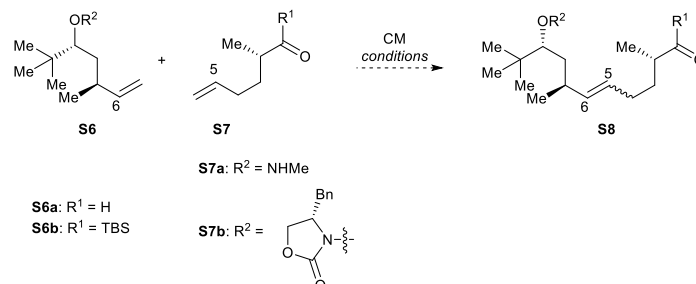

**Table S2. Optimization of the Cross metathesis**

| Entry | S7  | S6  | S7/S6 | Condition                           | Result |
|-------|-----|-----|-------|-------------------------------------|--------|
| 1     | S7a | S6a | 5:1   | G-I, benzoquinone, DCM, 40 °C       | trace  |
| 2     | S7a | S6a | 5:1   | G-II, benzoquinone, DCM, 40 °C      | trace  |
| 3     | S7a | S6a | 5:1   | HG-II, benzoquinone, DCM, 40 °C     | trace  |
| 4     | S7a | S6a | 10:1  | G-I, benzoquinone, DCM, 40 °C       | trace  |
| 5     | S7a | S6a | 10:1  | G-II, benzoquinone, DCM, 40 °C      | trace  |
| 6     | S7a | S6a | 10:1  | HG-II, benzoquinone, DCM, 40 °C     | trace  |
| 7     | S7a | S6a | 10:1  | G-I, benzoquinone, toluene, 40 °C   | trace  |
| 8     | S7a | S6a | 10:1  | G-II, benzoquinone, toluene, 40 °C  | trace  |
| 9     | S7a | S6a | 10:1  | HG-II, benzoquinone, toluene, 40 °C | trace  |
| 10    | S7a | S6b | 10:1  | G-II, benzoquinone, DCM, 40 °C      | trace  |
| 11    | S7a | S6b | 10:1  | G-I, benzoquinone, DCM, 40 °C       | trace  |
| 12    | S7a | S6b | 10:1  | HG-II, benzoquinone, DCM, 40 °C     | trace  |
| 13    | S7b | S6b | 10:1  | G-II, benzoquinone, DCM, 40 °C      | trace  |
| 14    | S7b | S6b | 10:1  | G-I, benzoquinone, DCM, 40 °C       | trace  |
| 15    | S7b | S6b | 10:1  | HG-II, benzoquinone, DCM, 40 °C     | trace  |

## 2. synthesis of *ent*-8

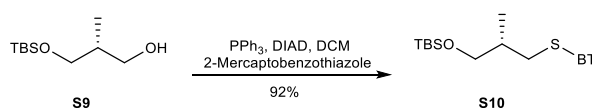

To a solution of alcohol **S9** [3] (3.3 g, 16.2 mmol, 1.0 eq.),  $\text{Ph}_3\text{P}$  (5.1 g, 19.4 mmol, 1.2 eq.) and 2-mercaptobenzthiazol (3.25 g, 19.4 mmol, 1.2 eq.) in dry DCM (80 mL, 0.2 M) under argon





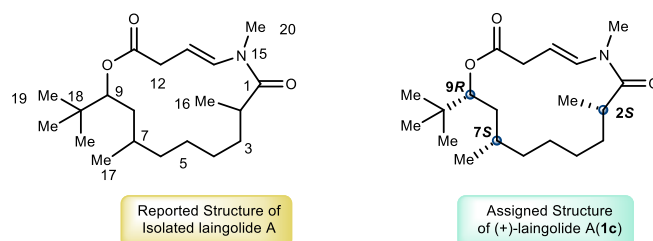

### 3. Comparison of $^1\text{H}$ NMR and $^{13}\text{C}$ NMR data of laingolide A

**Table 1 Comparison of  $^1\text{H}$  NMR data of laingolide A  
(Natural Product and Synthetic Sample)**

| NO.   | laingolide A                |                            |                            |                             |                            |
|-------|-----------------------------|----------------------------|----------------------------|-----------------------------|----------------------------|
|       | Natural ( $\delta_1$ )      | Sample 1a ( $\delta_2$ )   | Sample 1b ( $\delta_3$ )   | Sample 1c ( $\delta_4$ )    | Sample 1d ( $\delta_5$ )   |
| 1     | -                           | -                          | -                          | -                           | -                          |
| 2     | 2.99, m                     | 2.86–2.72, m               | 2.91, dt (13.4, 6.5)       | 3.03–2.95, m                | 2.68, dqd (12.9, 6.6, 4.4) |
| 3a    | 1.56, m                     | 1.80–1.63, m               | 1.58–1.51, m               | 1.60–1.52, m                | 1.49–1.33, m               |
| 3b    | 1.40, m                     | 1.59–1.52, m               | 1.58–1.51, m               | 1.47–1.34, m                | 1.49–1.33, m               |
| 4a    | 1.24, m                     | 1.40–1.33, m               | 1.33–1.25, m               | 1.30–1.17, m                | 1.25–1.23, m               |
| 4b    | 1.04, m                     | 1.25–1.17, m               | 1.10–0.99, m               | 1.17–1.12, m                | 1.14, d (6.4)              |
| 5a    | 1.26, m                     | 1.40–1.33, m               | 1.33–1.25, m               | 1.30–1.17, m                | 1.29–1.25, m               |
| 5b    | 1.12, m                     | 1.25–1.17, m               | 1.25–1.18, m               | 1.17–1.12, m                | 1.22–1.16, m               |
| 6a    | 1.32, m                     | 1.46–1.40, m               | 1.46–1.36, m               | 1.35–1.27, m                | 1.49–1.33, m               |
| 6b    | 1.23, m                     | 1.32–1.27, m               | 1.33–1.25, m               | 1.30–1.17, m                | 1.25–1.23, m               |
| 7     | 1.17, m                     | 1.32–1.27, m               | 1.25–1.18, m               | 1.30–1.17, m                | 1.22–1.16, m               |
| 8a    | 1.58, m                     | 1.80–1.63, m               | 1.65–1.61, m               | 1.64–1.57, m                | 1.63–1.50, m               |
| 8b    | 0.99, m                     | 0.96–0.91, m               | 0.85–0.79, m               | 1.03–0.95, m                | 1.14–1.05, m               |
| 9     | 4.81, dd (11.0, <1.0)       | 4.94, dd (11.1, 2.5)       | 4.92, dd (11.9, 1.8)       | 4.81, dd (11.3, 1.3)        | 4.86, dd (10.9, 1.3)       |
| 10(O) | -                           | -                          | -                          | -                           | -                          |
| 11    | -                           | -                          | -                          | -                           | -                          |
| 12a   | 3.06, ddd (12.0, 6.0, 1.5)  | 3.17–3.08, m               | 3.05, ddd (13.3, 7.4, 0.9) | 3.07, ddd (12.3, 5.6, 1.5)  | 3.2, ddd (16.5, 6.3, 1.4)  |
| 12b   | 2.94, dd (12.0, 10.8)       | 2.98, ddd (16.0, 9.5, 0.8) | 2.99, ddd (13.3, 6.9, 1.4) | 2.94, dd (12.3, 10.4)       | 3.07, ddd (16.5, 8.7, 1.0) |
| 13    | 5.18, ddd (14.0, 10.8, 6.0) | 5.21, ddd (13.8, 9.4, 6.0) | 5.16, dt (14.1, 7.2)       | 5.18, ddd (13.6, 10.3, 5.7) | 5.21, ddd (13.8, 8.6, 6.3) |
| 14    | 7.01, dd (14.0, 1.5)        | 6.76, d (13.8)             | 7.09, d (13.9)             | 7.02, dd (13.7, 1.4)        | 6.74, d (13.9)             |
| 15(N) | -                           | -                          | -                          | -                           | -                          |

|    |                      |                      |                      |                      |                      |
|----|----------------------|----------------------|----------------------|----------------------|----------------------|
| 16 | 1.16, 3H, d<br>(6.6) | 1.15, 3H, d<br>(6.5) | 1.15, 3H, d<br>(6.6) | 1.15, 3H, d<br>(6.5) | 1.14, 3H, d<br>(6.4) |
| 17 | 0.83, 3H, d<br>(7.0) | 0.89, 3H, s          | 0.78, 3H, d<br>(6.4) | 0.84, 3H, d<br>(5.7) | 0.85, 3H, d<br>(5.8) |
| 18 | -                    | -                    | -                    | -                    | -                    |
| 19 | 0.89, 9H, s          | 0.88, 9H, s          | 0.88, 9H, s          | 0.89, 9H, s          | 0.88, 9H, s          |
| 20 | 3.10, 3H, s          | 3.11, 3H, s          | 3.09, 3H, s          | 3.10, 3H, s          | 3.11, 3H, s          |
| 21 | -                    | -                    | -                    | -                    | -                    |

**Table 2 Comparison of  $^{13}\text{C}$  NMR data of laingolide A  
(Natural Product and Synthetic Sample)**

| No. | laingolide A              |                             |                                  |                             |                                  |                             |                                  |                             |                                  |
|-----|---------------------------|-----------------------------|----------------------------------|-----------------------------|----------------------------------|-----------------------------|----------------------------------|-----------------------------|----------------------------------|
|     | Natural<br>( $\delta_1$ ) | Sample<br>1a ( $\delta_2$ ) | $\Delta\delta=\delta_1-\delta_2$ | Sample<br>1b ( $\delta_3$ ) | $\Delta\delta=\delta_1-\delta_3$ | Sample<br>1c ( $\delta_4$ ) | $\Delta\delta=\delta_1-\delta_4$ | Sample<br>1d ( $\delta_5$ ) | $\Delta\delta=\delta_1-\delta_5$ |
| 1   | 176.4                     | 176.3                       | 0.1                              | 176.5                       | -0.1                             | 176.4                       | 0                                | 176.6                       | -0.2                             |
| 2   | 36.2                      | 35.4                        | 0.8                              | 35.4                        | 0.8                              | 36.2                        | 0                                | 35.6                        | 0.6                              |
| 3   | 36.6                      | 35.7                        | 0.9                              | 35.7                        | 0.9                              | 36.6                        | 0                                | 36.2                        | 0.4                              |
| 4   | 26.2                      | 26.7                        | -0.5                             | 26.1                        | 0.1                              | 26.2                        | 0                                | 24.9                        | 1.3                              |
| 5   | 26.8                      | 27.6                        | -0.8                             | 26.7                        | 0.1                              | 26.8                        | 0                                | 26.6                        | 0.2                              |
| 6   | 36.8                      | 37.1                        | -0.3                             | 37.3                        | -0.5                             | 36.8                        | 0                                | 37.5                        | -0.7                             |
| 7   | 27.7                      | 30.5                        | -2.8                             | 26.7                        | 1                                | 27.7                        | 0                                | 26.9                        | 0.8                              |
| 8   | 35.5                      | 34.3                        | 1.2                              | 35.3                        | 0.2                              | 35.5                        | 0                                | 35.0                        | 0.5                              |
| 9   | 79.7                      | 77.9                        | 1.8                              | 78.5                        | 1.2                              | 79.7                        | 0                                | 80.5                        | -0.8                             |
| 10  |                           |                             |                                  |                             |                                  |                             |                                  |                             |                                  |
| 11  | 172.5                     | 173.3                       | -0.8                             | 172.1                       | 0.4                              | 172.5                       | 0                                | 171.9                       | 0.6                              |
| 12  | 37.6                      | 37.7                        | -0.1                             | 38.6                        | -1                               | 37.6                        | 0                                | 38.7                        | -1.1                             |
| 13  | 105.0                     | 104.2                       | 0.8                              | 103.6                       | 1.4                              | 105.0                       | 0                                | 106.8                       | -1.8                             |
| 14  | 133.6                     | 133.4                       | 0.2                              | 133.8                       | -0.2                             | 133.5                       | 0.1                              | 132.6                       | 1                                |
| 15  |                           |                             |                                  |                             |                                  |                             |                                  |                             |                                  |
| 16  | 18.5                      | 17.2                        | 1.3                              | 18.0                        | 0.5                              | 18.5                        | 0                                | 16.6                        | 1.9                              |
| 17  | 21.2                      | 20.1                        | 1.1                              | 20.9                        | 0.3                              | 21.2                        | 0                                | 18.9                        | 2.3                              |
| 18  | 35.1                      | 34.2                        | 0.9                              | 34.1                        | 1                                | 35.1                        | 0                                | 33.7                        | 1.4                              |
| 19  | 26.7                      | 27.4                        | -0.7                             | 26.6                        | 0.1                              | 26.7                        | 0                                | 25.3                        | 1.4                              |
| 20  | 31.2                      | 31.3                        | -0.1                             | 31.4                        | -0.2                             | 31.2                        | 0                                | 32.2                        | -1                               |

#### 4. References

- [1] Ghosh, A.K.; and Gong, G. L. *J. Am. Chem. Soc.* **2004**, 126, 3704.  
 [2] Tello-Aburto, R.; Newar, T. D.; Maio, W.A. *J. Org. Chem.* **2012**, 77, 6271.  
 [3] Millán, A.; Martinez, P. D. G.; Aggarwal, V. K. *Chem. Eur. J.* **2018**, 24, 730.

## 5. NMR spectra

$^1\text{H}$  NMR Spectrum of **S2** (300 MHz,  $\text{CDCl}_3$ )

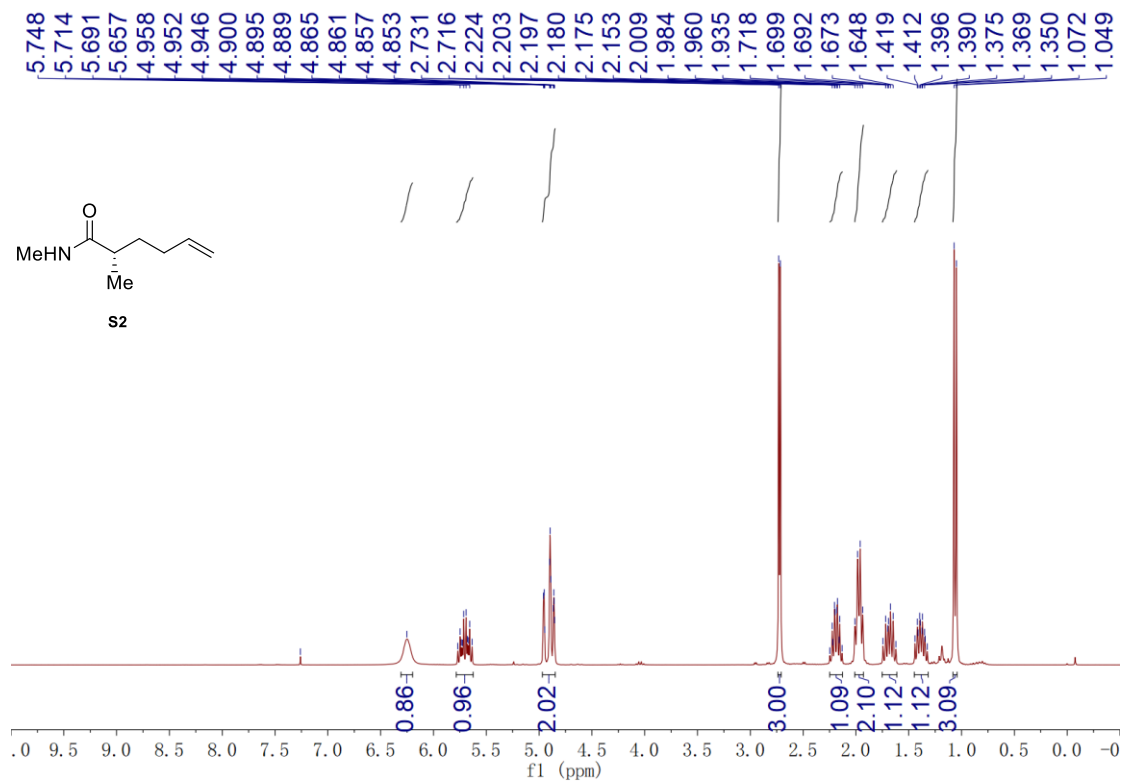

$^{13}\text{C}$  NMR Spectrum of **S2** (75 MHz,  $\text{CDCl}_3$ )

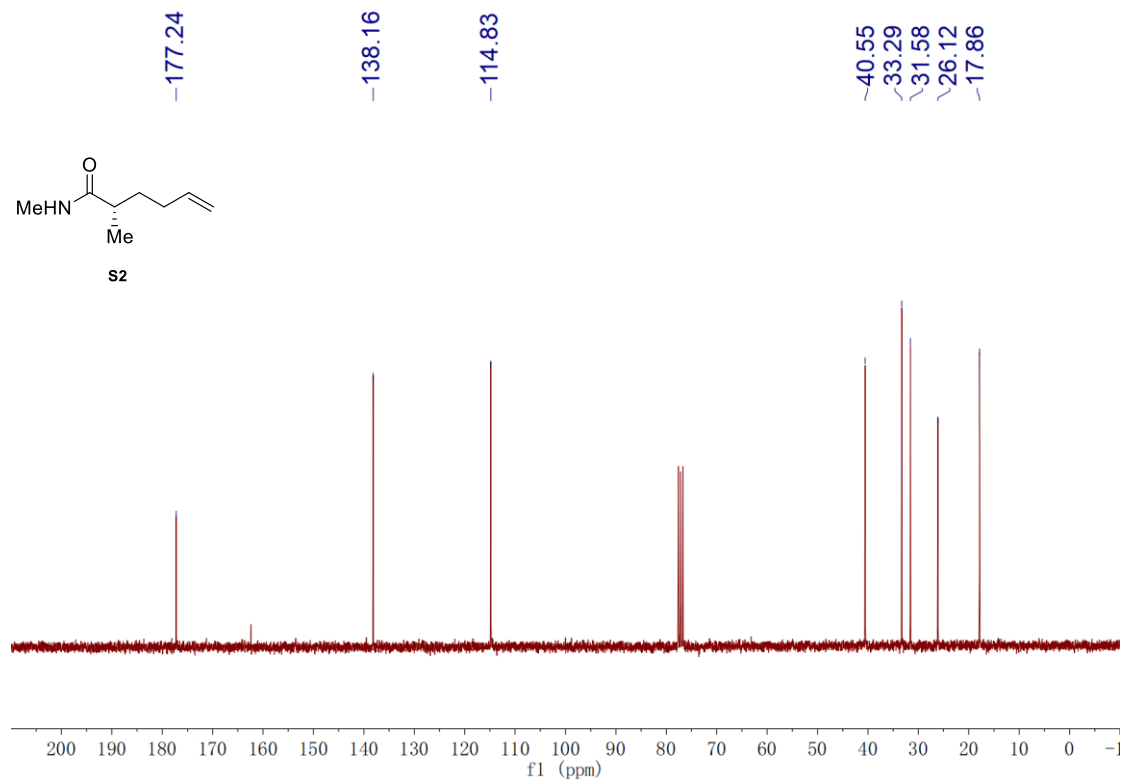

$^1\text{H}$  NMR Spectrum of **S4** (400 MHz,  $\text{CDCl}_3$ )

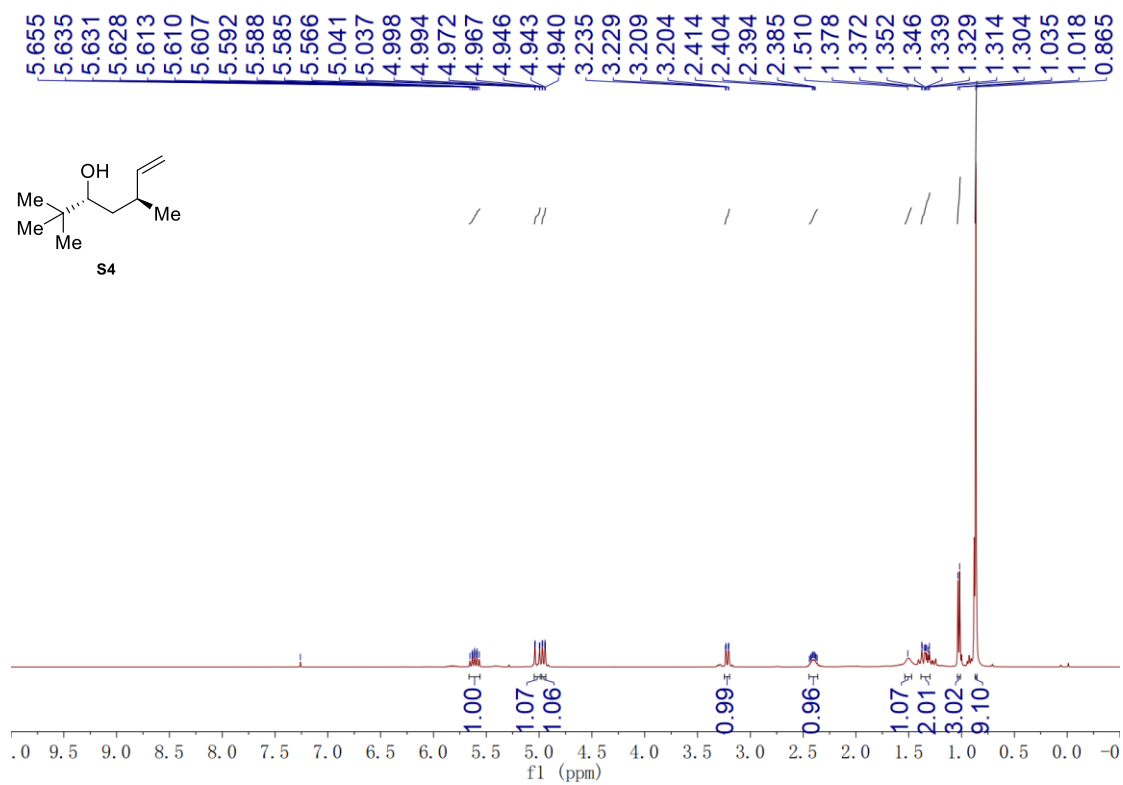

$^{13}\text{C}$  NMR Spectrum of **S4** (100 MHz,  $\text{CDCl}_3$ )

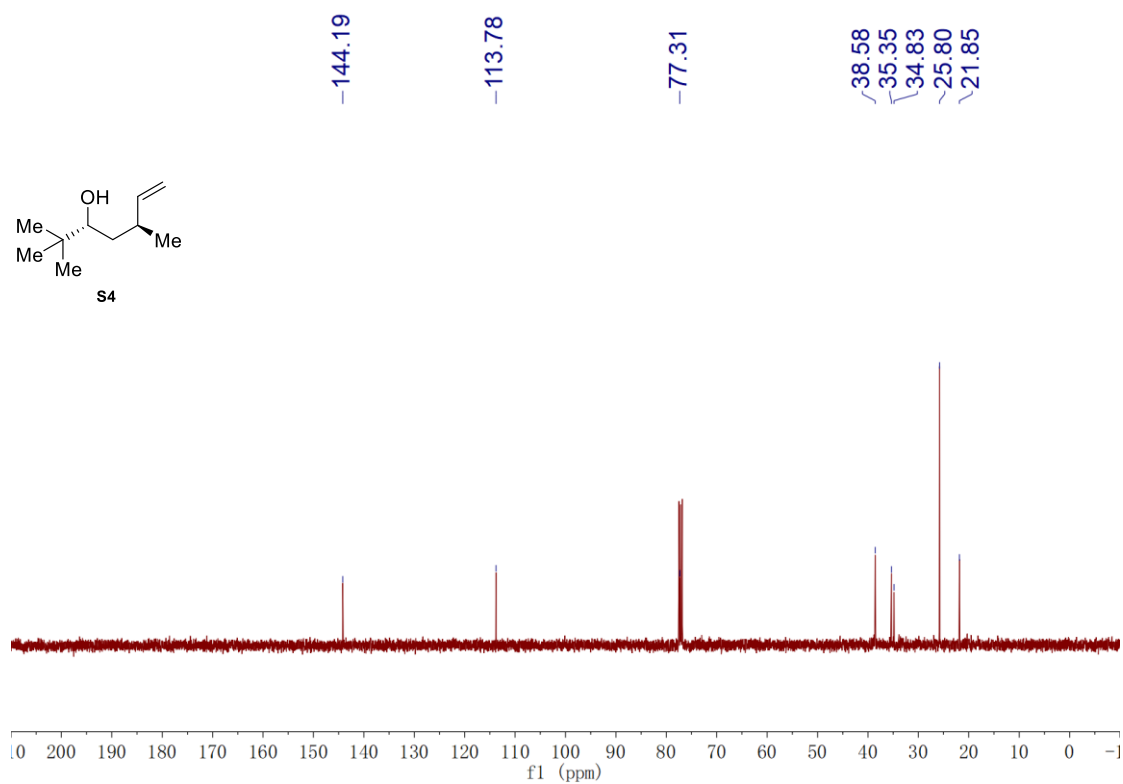

<sup>1</sup>H NMR Spectrum of **S5** (400 MHz, CDCl<sub>3</sub>)

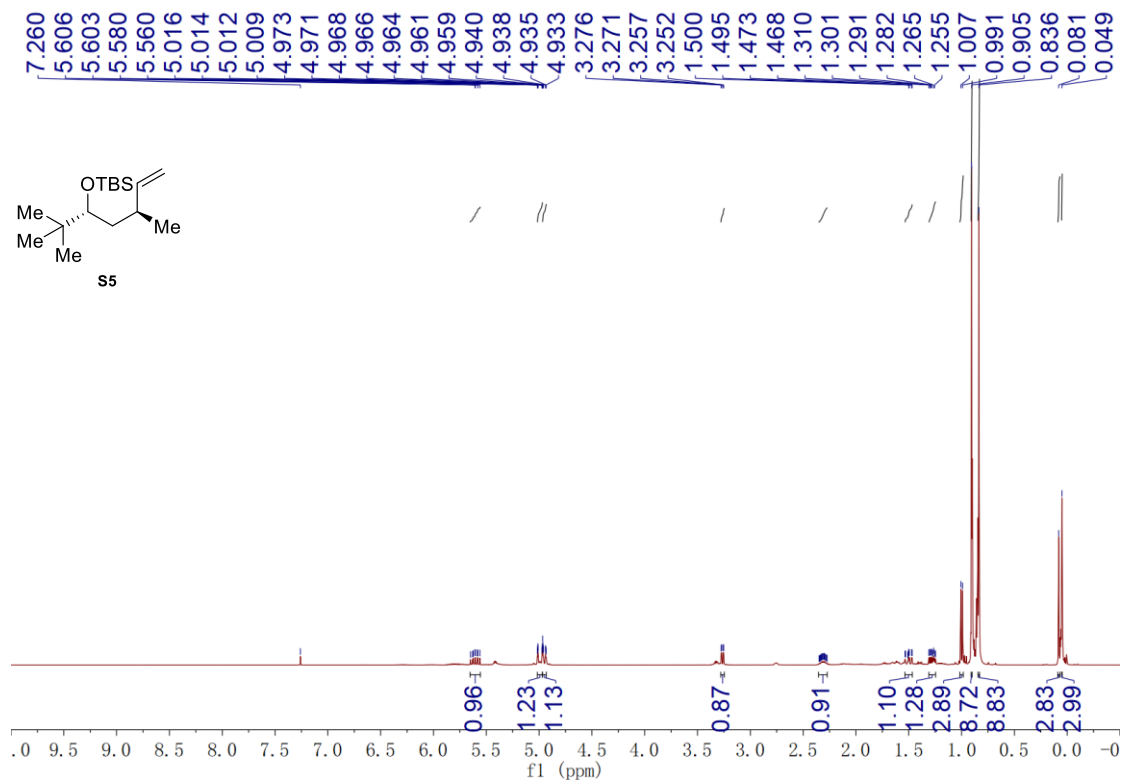

<sup>13</sup>C NMR Spectrum of **S5** (100 MHz, CDCl<sub>3</sub>)

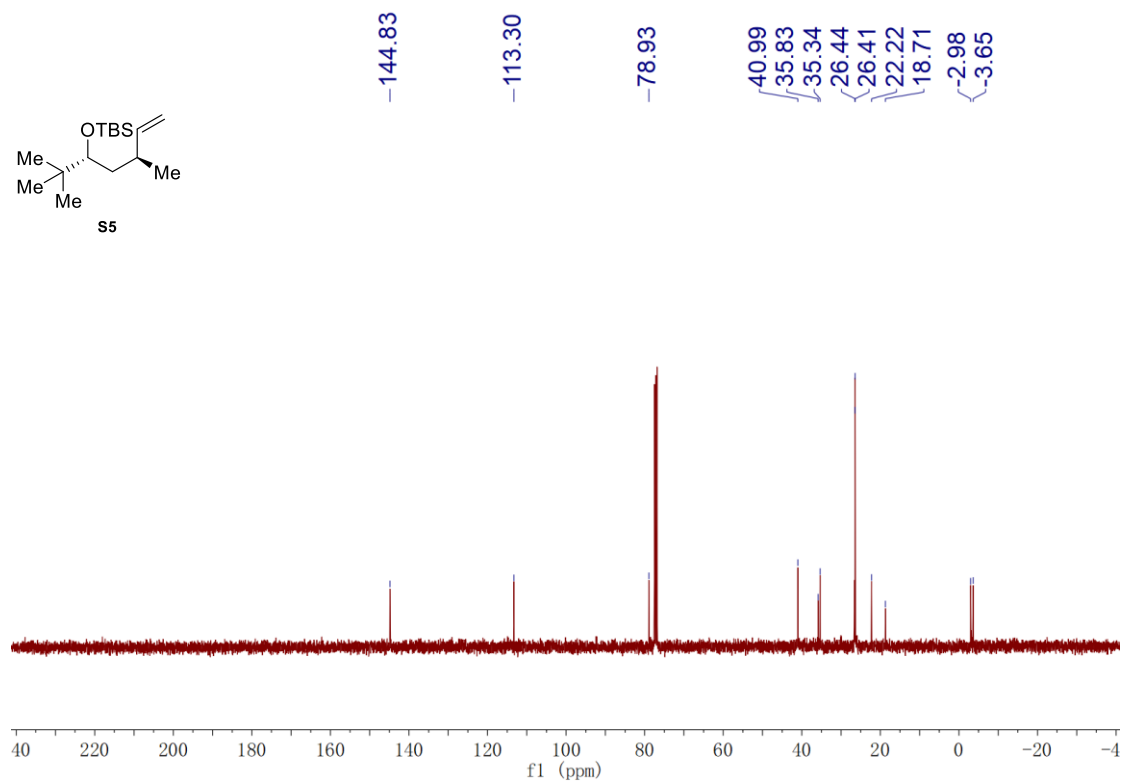

[illegible]

CC(C)(CSi(C)(C)C)CSi(C)(C)C  
**S10**

167.86  
 153.49  
 135.31  
 126.11  
 124.20  
 121.59  
 121.02  
 77.00  
 66.57  
 37.17  
 36.15  
 26.07  
 18.47  
 16.43  
 5.25  
 5.28

[illegible]

Chemical structure of **ent-8** is shown above the spectrum. The structure is a substituted cyclohexane derivative with a TBSO group, a methyl group, and a sulfonate group (BT).

The <sup>13</sup>C NMR spectrum (CDCl<sub>3</sub>) displays the following chemical shifts (ppm):

- 166.55
- 152.85
- 136.92
- 128.09
- 127.71
- 125.62
- 122.44
- 66.38
- 57.67
- 31.70
- 25.90
- 18.29
- 16.87
- 5.38
- 5.44

The spectrum shows a complex pattern of peaks, with a prominent peak at 66.38 ppm, likely corresponding to the TBSO group. The aromatic region (120-160 ppm) shows several peaks, and the aliphatic region (10-30 ppm) shows multiple signals.



$^1\text{H}$  NMR Spectrum of **S11** (500 MHz,  $\text{CDCl}_3$ )

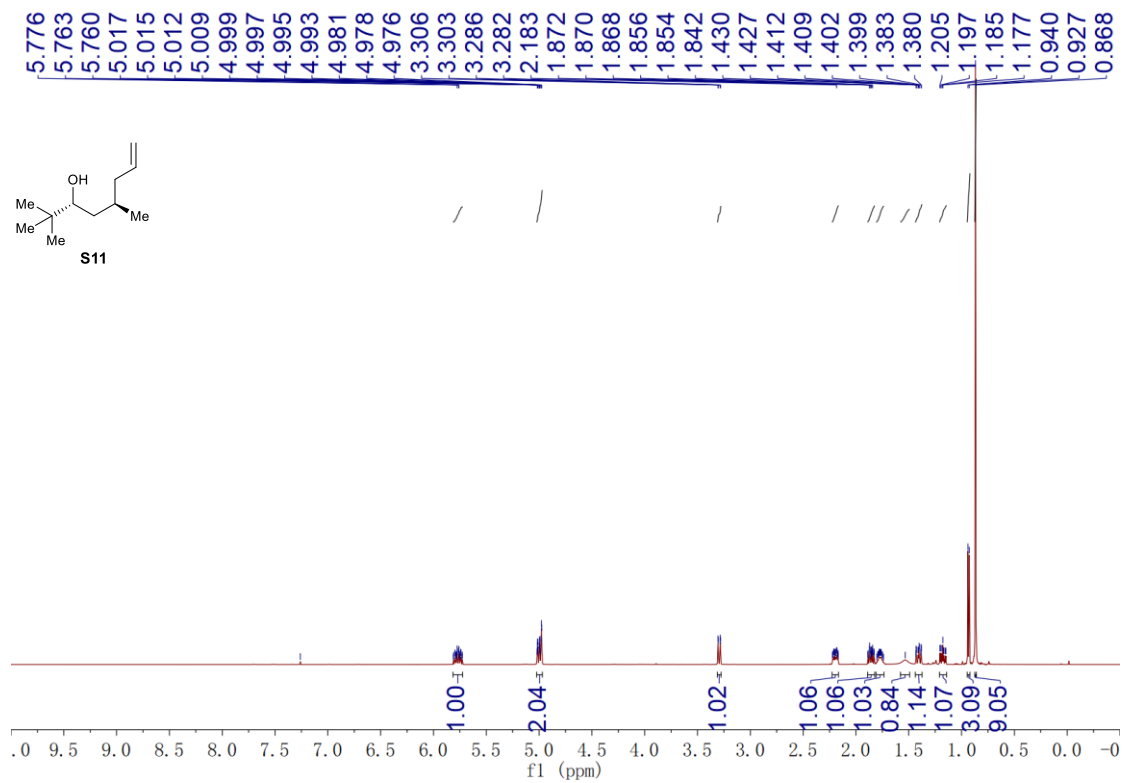

$^{13}\text{C}$  NMR Spectrum of **S11** (125 MHz,  $\text{CDCl}_3$ )

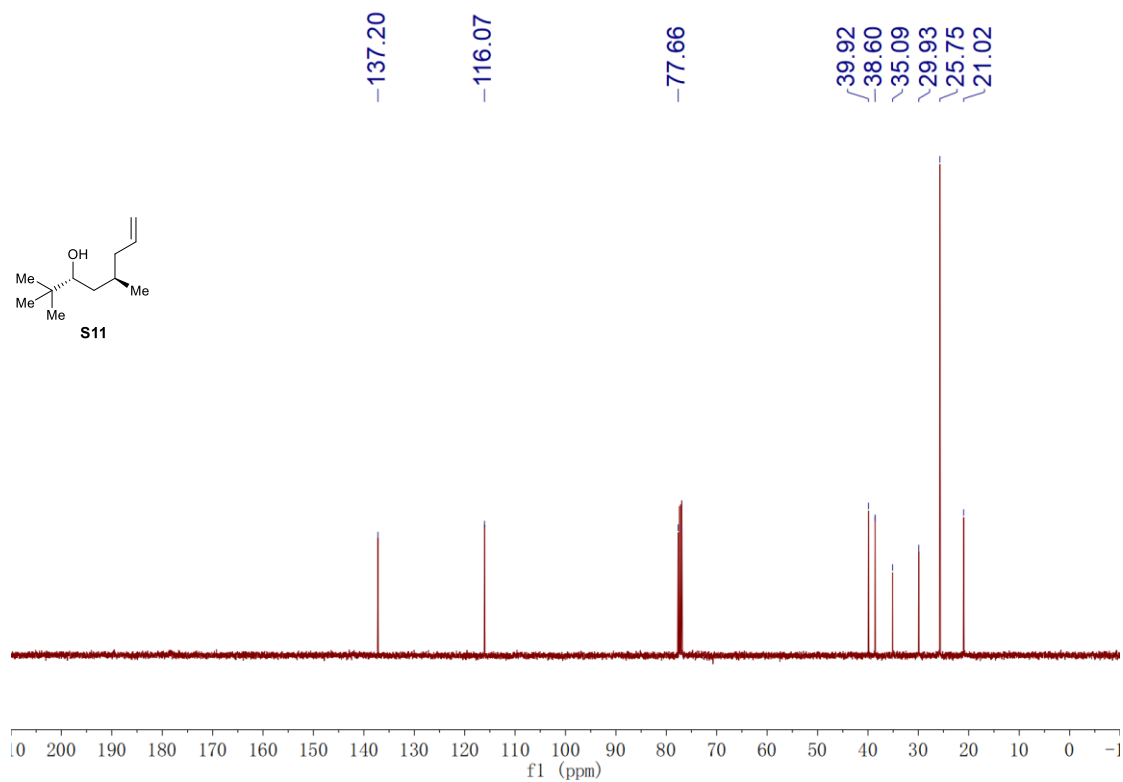

$^1\text{H}$  NMR Spectrum of **10** (500 MHz,  $\text{CDCl}_3$ )

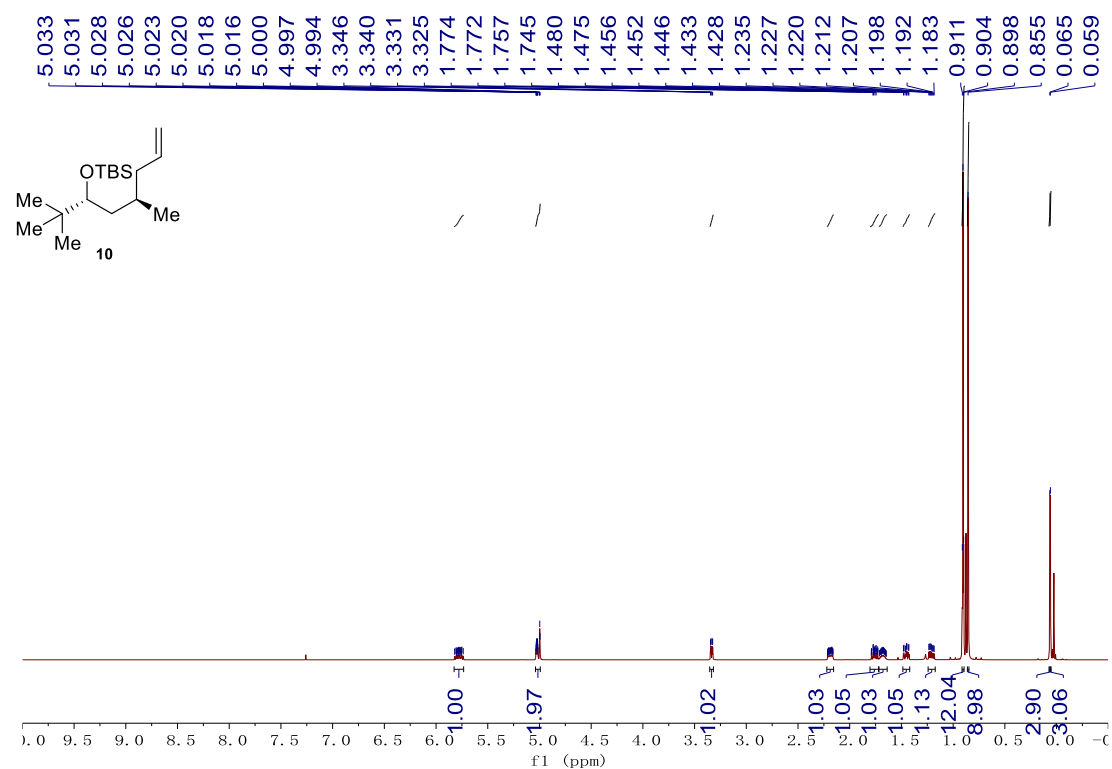

$^{13}\text{C}$  NMR Spectrum of **10** (125 MHz,  $\text{CDCl}_3$ )

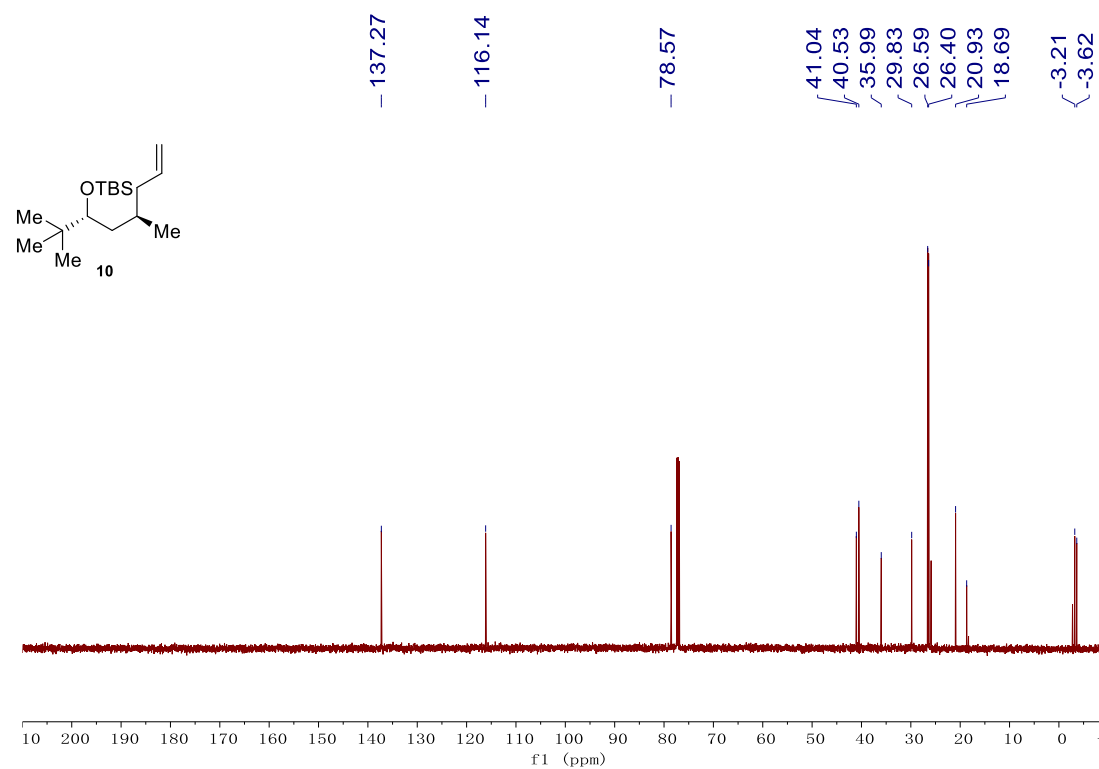

$^1\text{H}$  NMR Spectrum of **11** (400 MHz,  $\text{CDCl}_3$ )

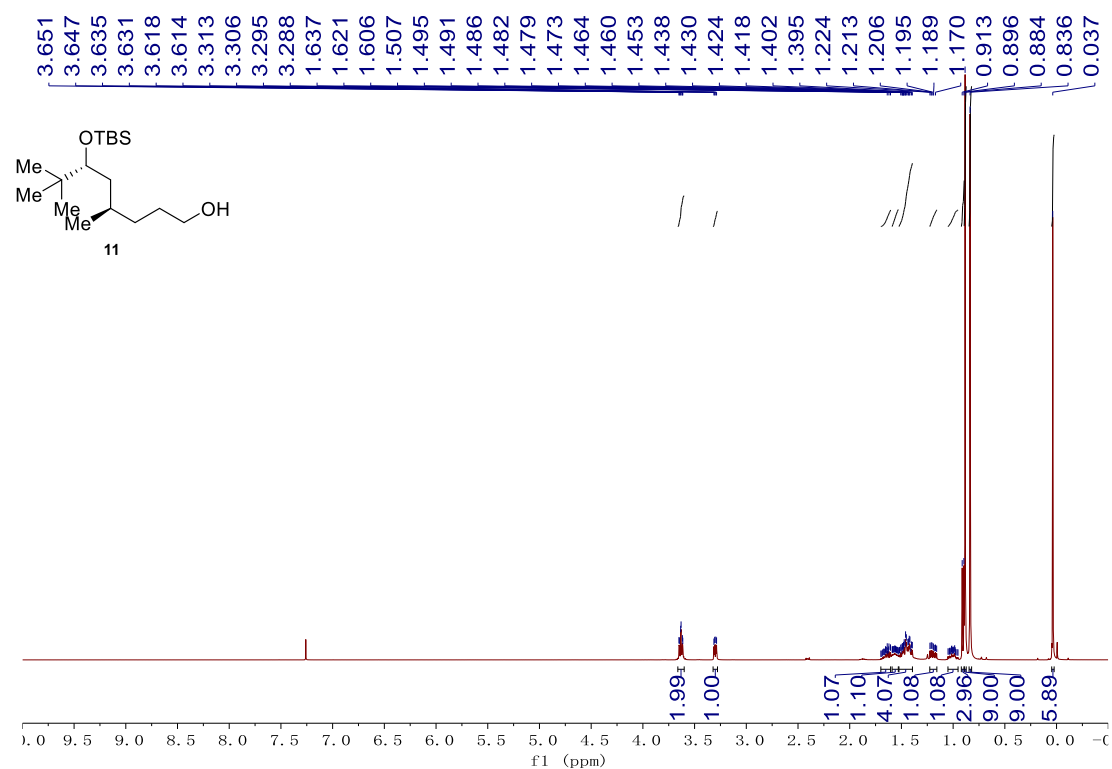

$^{13}\text{C}$  NMR Spectrum of **11** (100 MHz,  $\text{CDCl}_3$ )

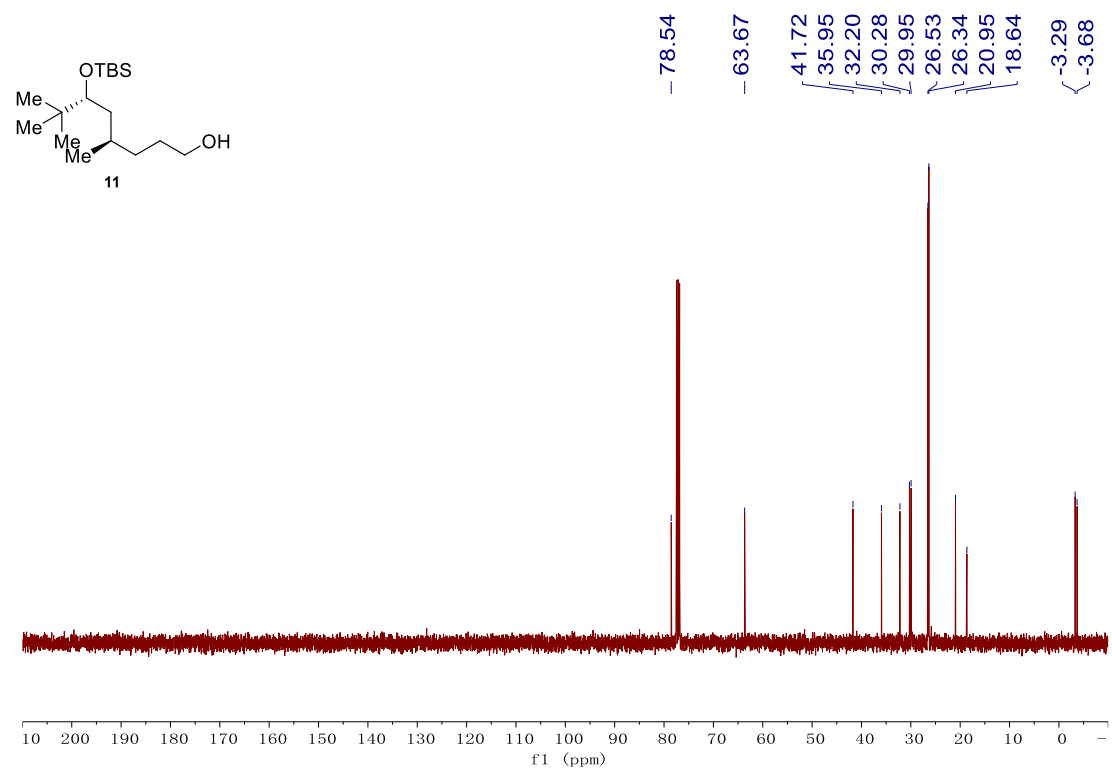

$^1\text{H}$  NMR Spectrum of **12** (500 MHz,  $\text{CDCl}_3$ )

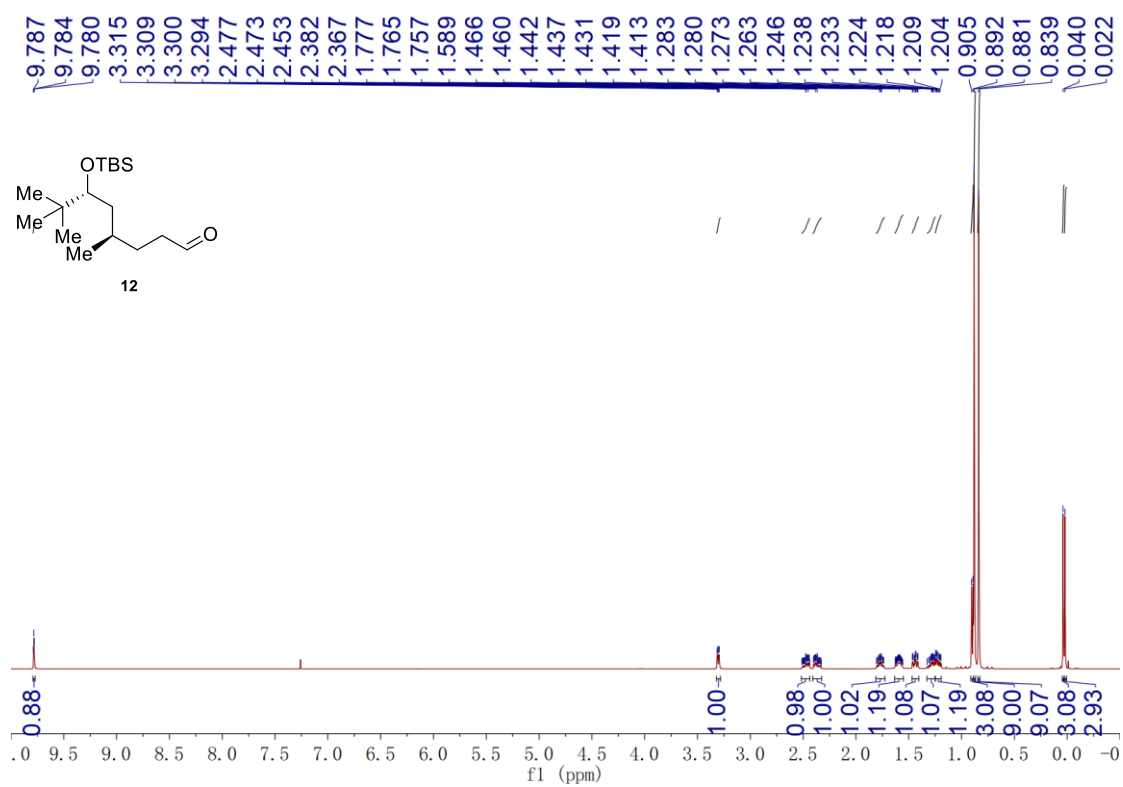

$^{13}\text{C}$  NMR Spectrum of **12** (125 MHz,  $\text{CDCl}_3$ )

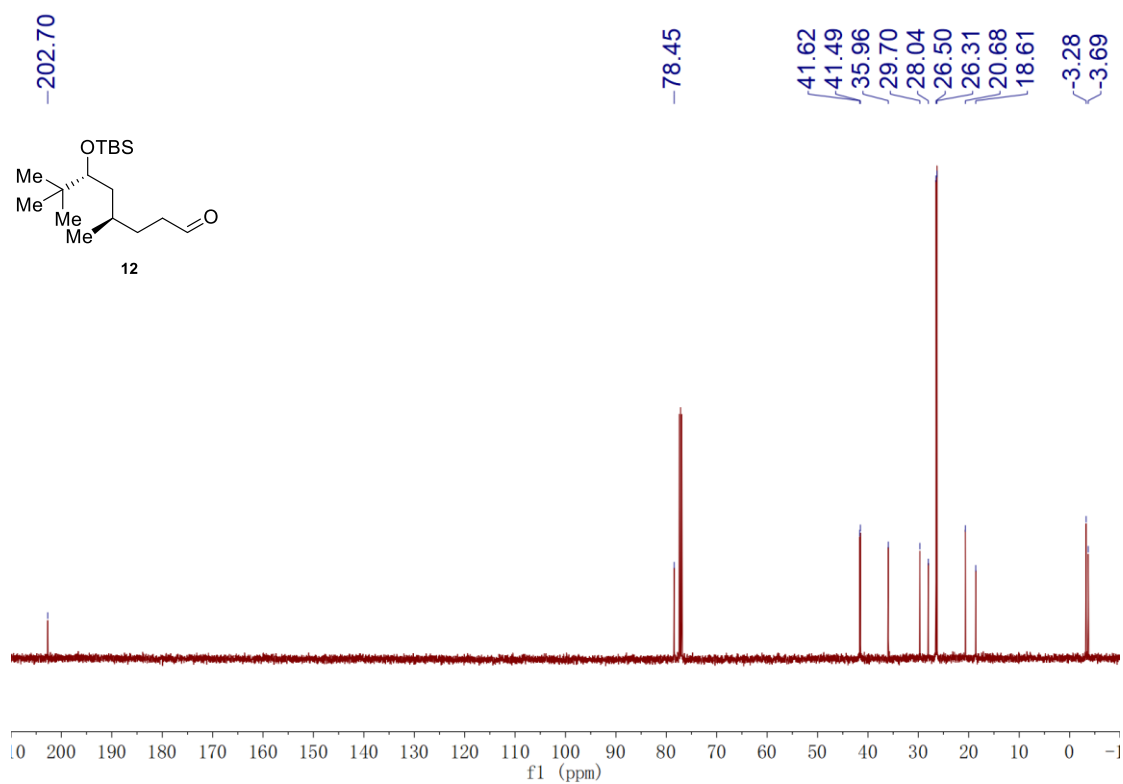

<sup>1</sup>H NMR Spectrum of **7** (400 MHz, CDCl<sub>3</sub>)

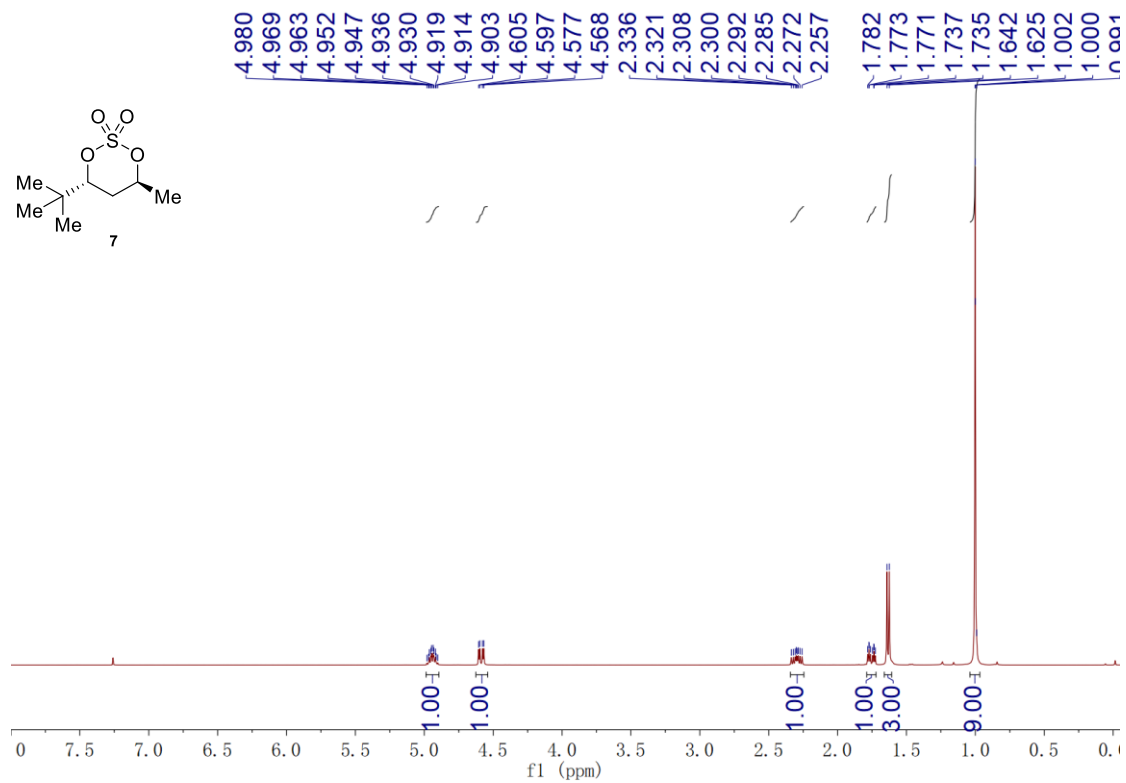

<sup>13</sup>C NMR Spectrum of **7** (100 MHz, CDCl<sub>3</sub>)

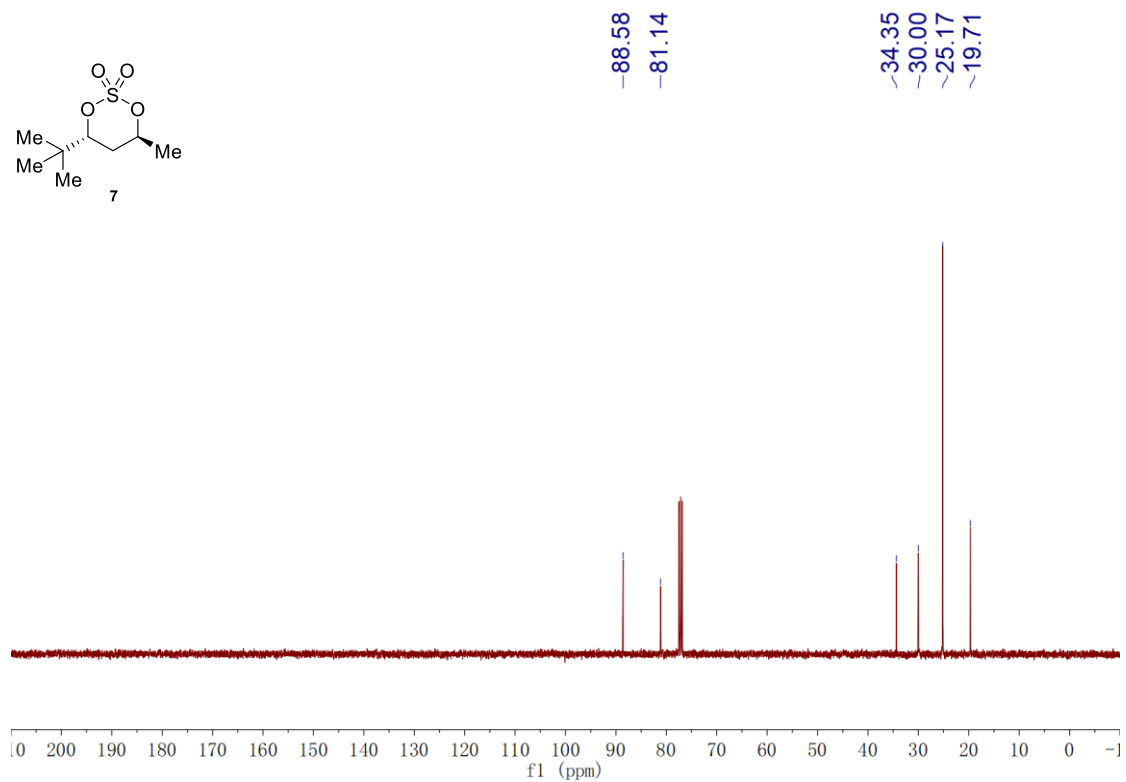

$^1\text{H}$  NMR Spectrum of **S12** (400 MHz,  $\text{CDCl}_3$ )

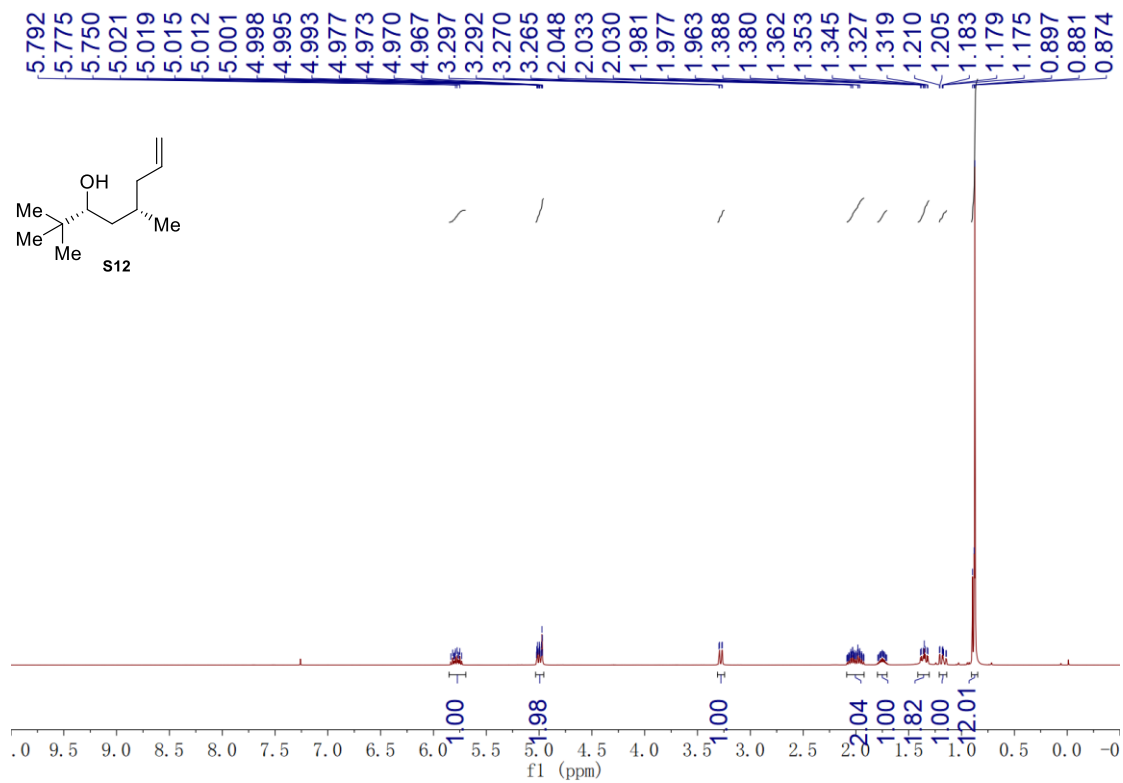

$^{13}\text{C}$  NMR Spectrum of **S12** (100 MHz,  $\text{CDCl}_3$ )

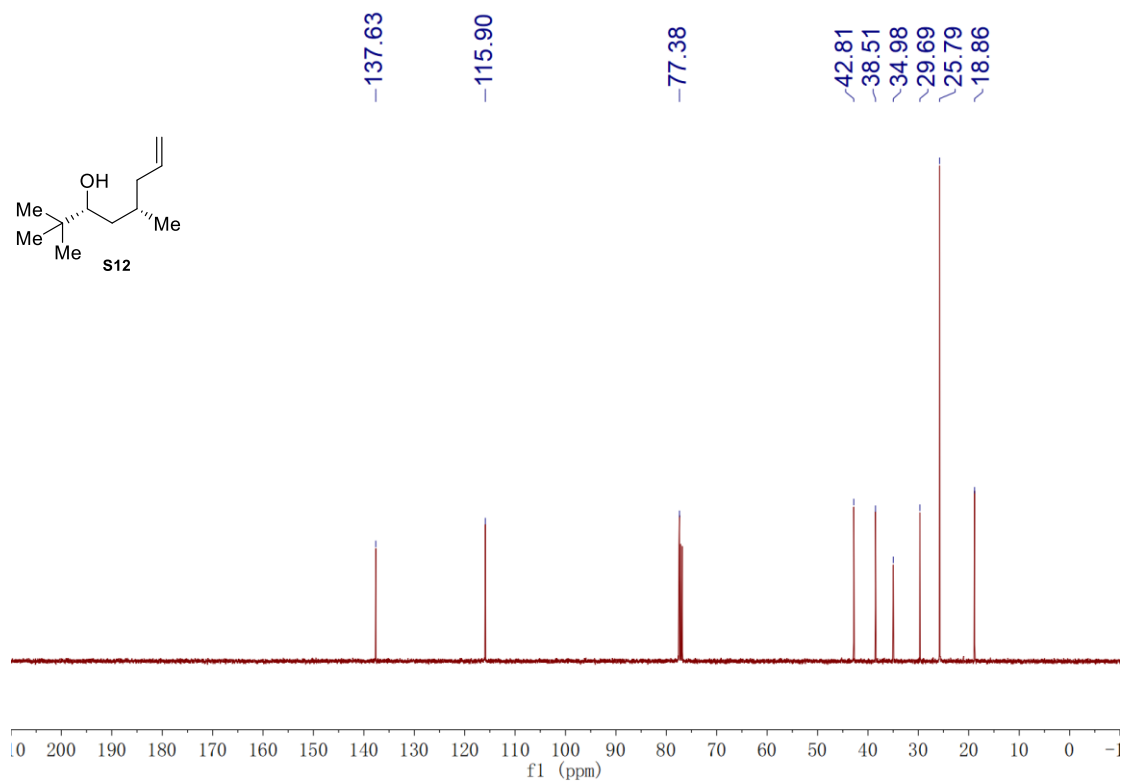

$^1\text{H}$  NMR Spectrum of **13** (400 MHz,  $\text{CDCl}_3$ )

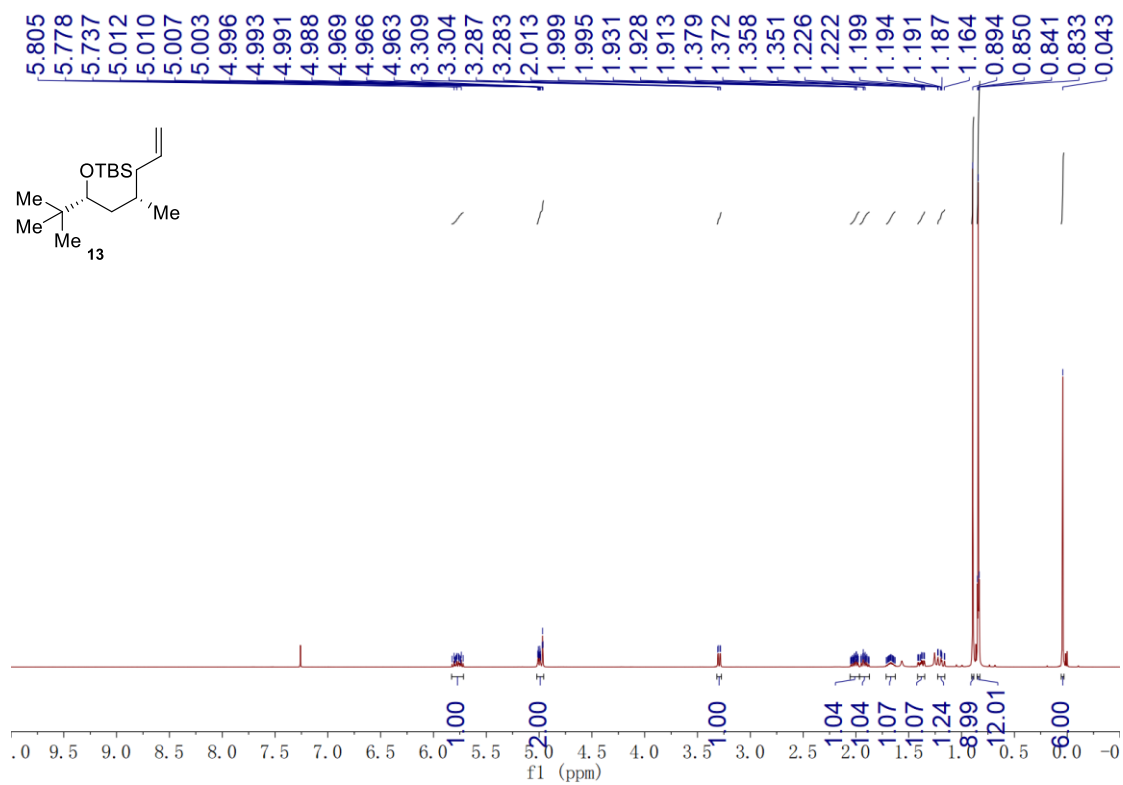

$^{13}\text{C}$  NMR Spectrum of **13** (100 MHz,  $\text{CDCl}_3$ )

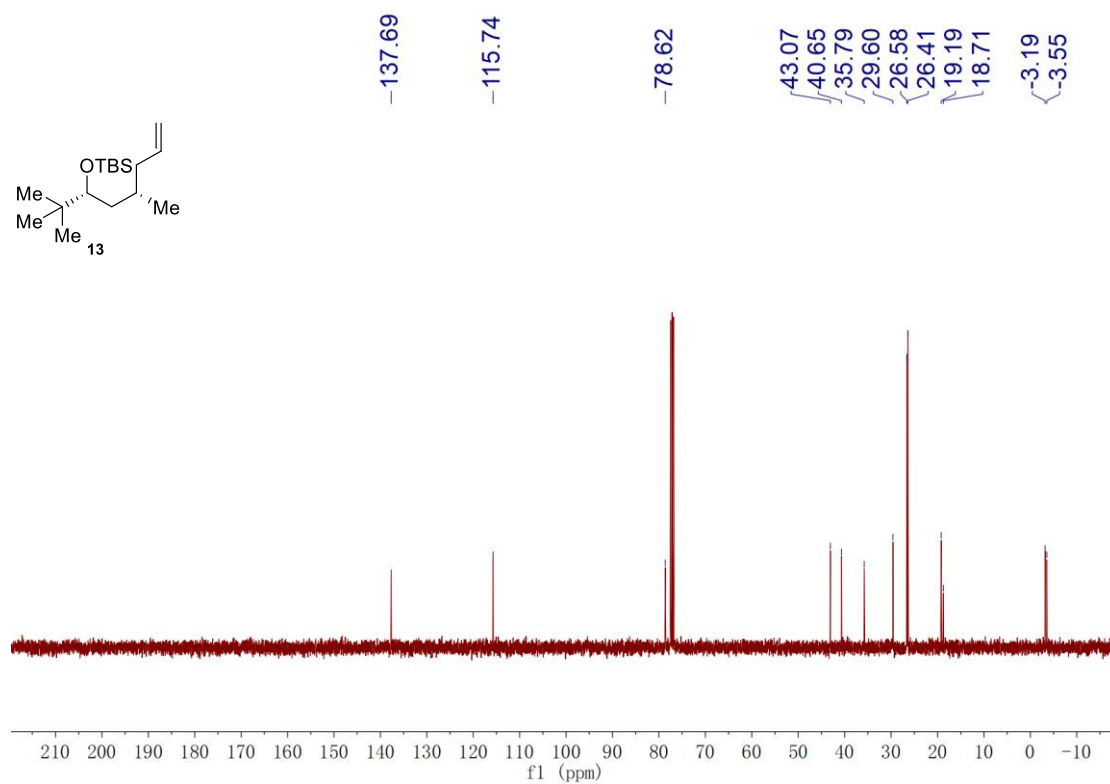

$^1\text{H}$  NMR Spectrum of **14** (400 MHz,  $\text{CDCl}_3$ )

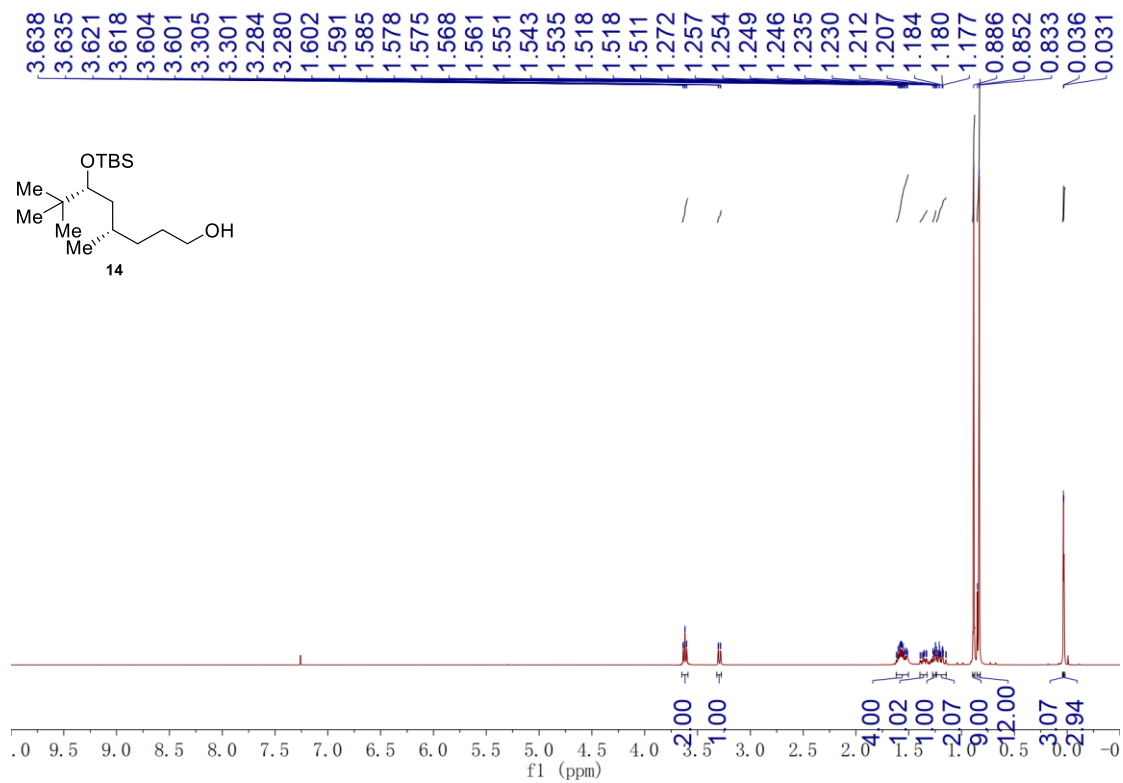

$^{13}\text{C}$  NMR Spectrum of **14** (100 MHz,  $\text{CDCl}_3$ )

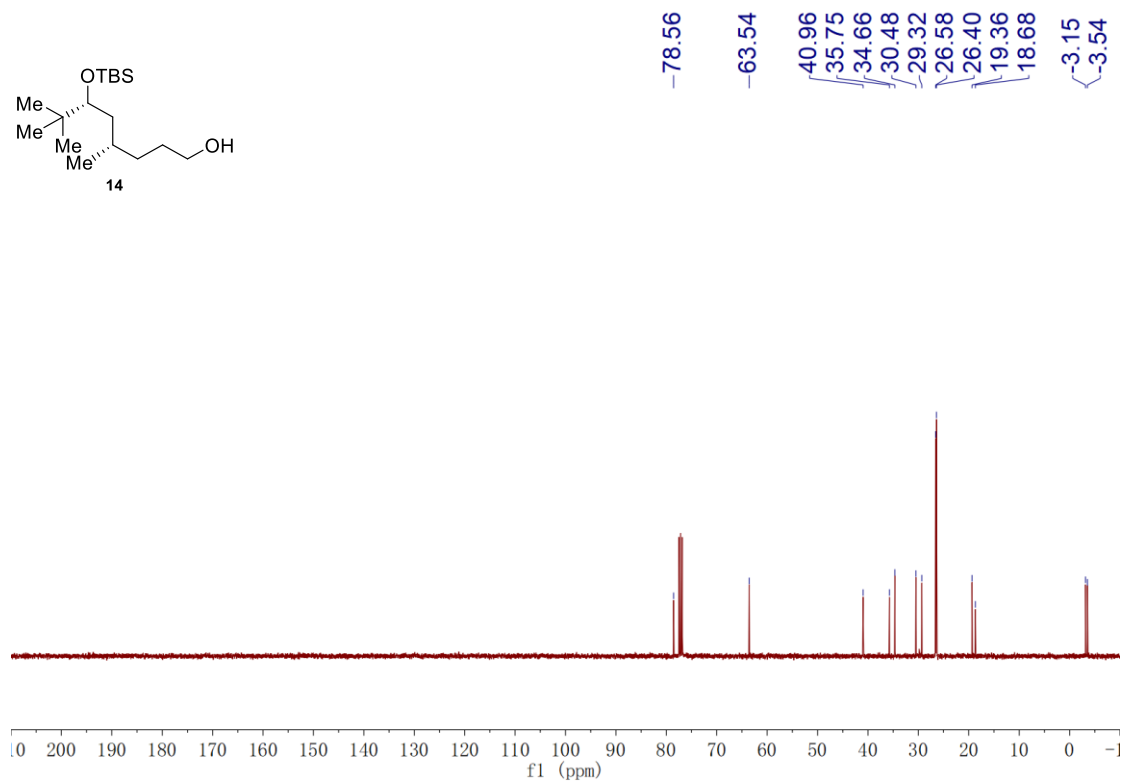



$^1\text{H}$  NMR Spectrum of **15** (400 MHz,  $\text{CDCl}_3$ )

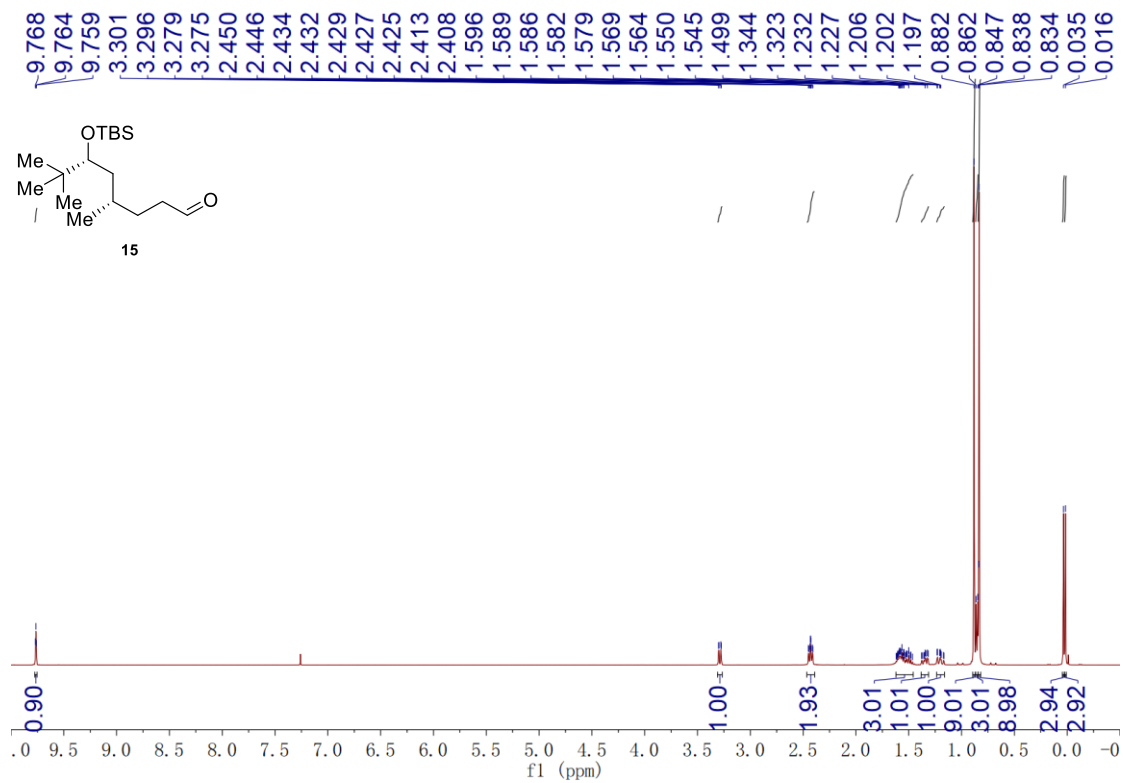

$^{13}\text{C}$  NMR Spectrum of **15** (100 MHz,  $\text{CDCl}_3$ )

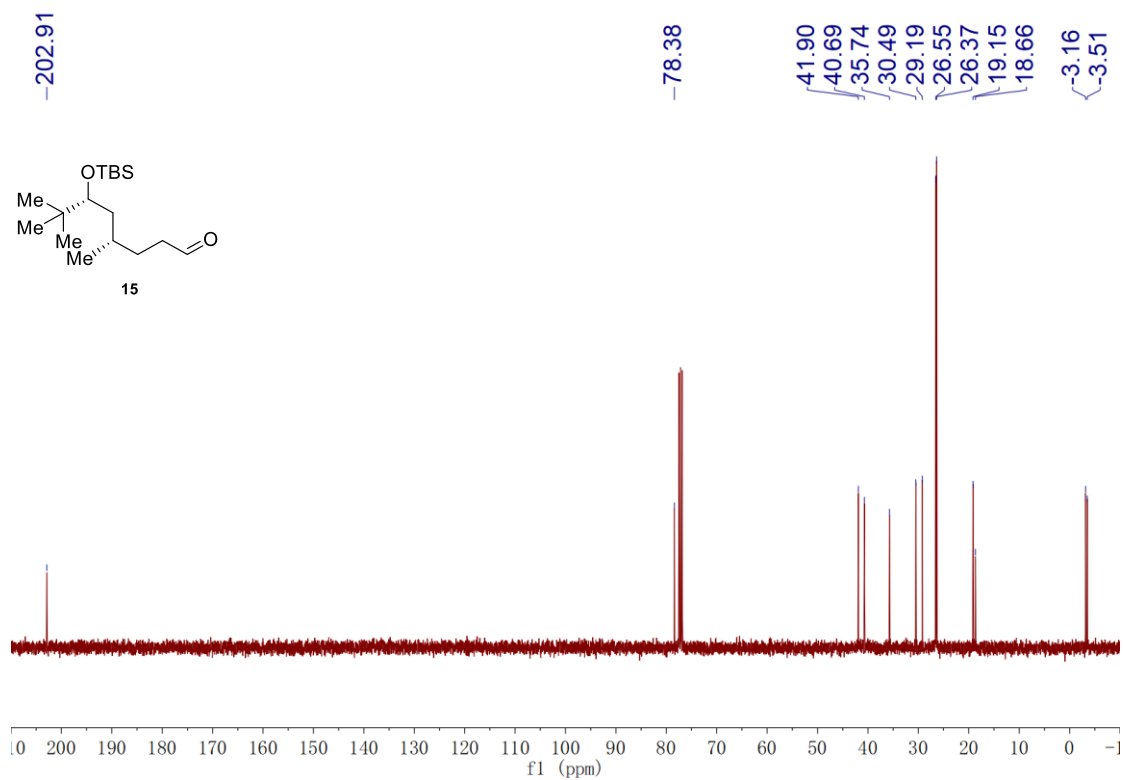

$^1\text{H}$  NMR Spectrum of **16** (400 MHz,  $\text{CDCl}_3$ )

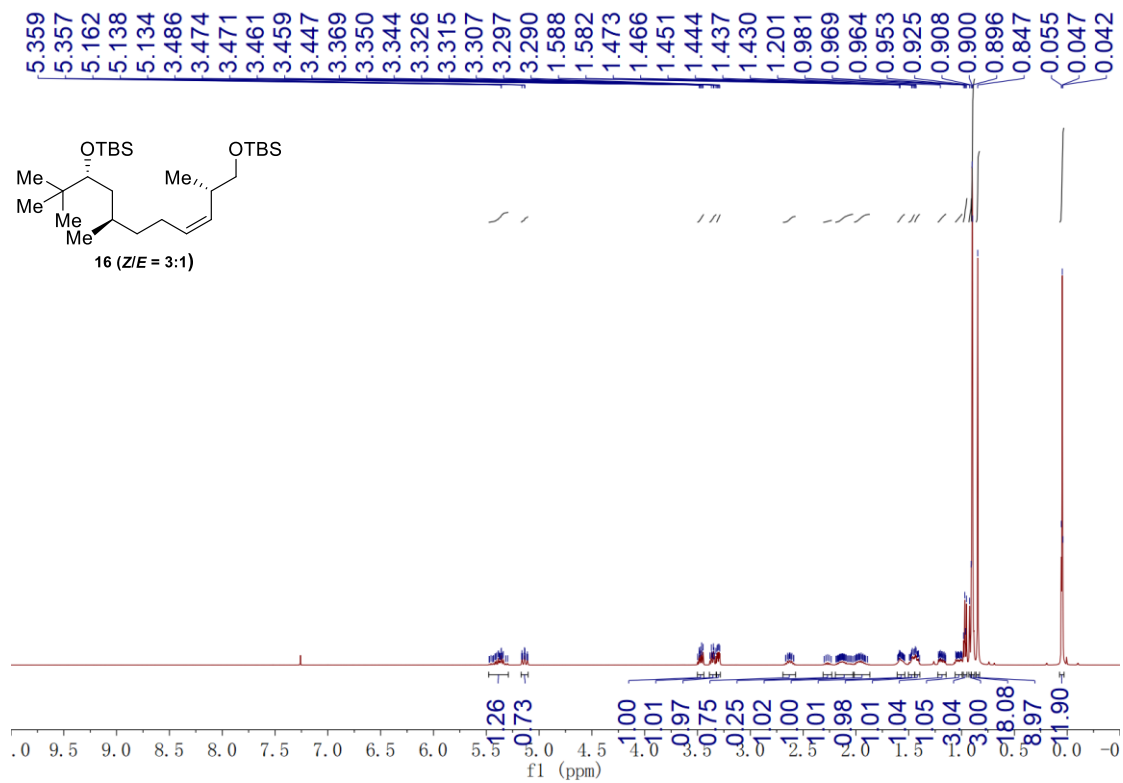

$^{13}\text{C}$  NMR Spectrum of **16** (100 MHz,  $\text{CDCl}_3$ )

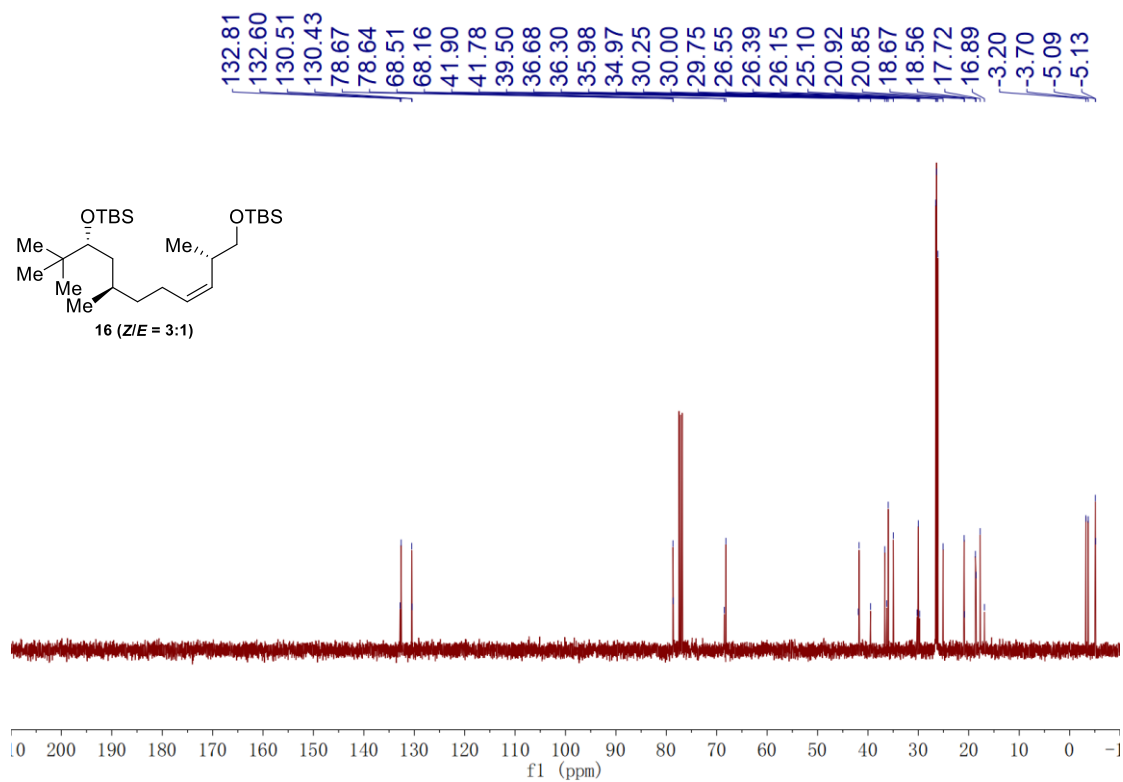

$^1\text{H}$  NMR Spectrum of **17** (500 MHz,  $\text{CDCl}_3$ )

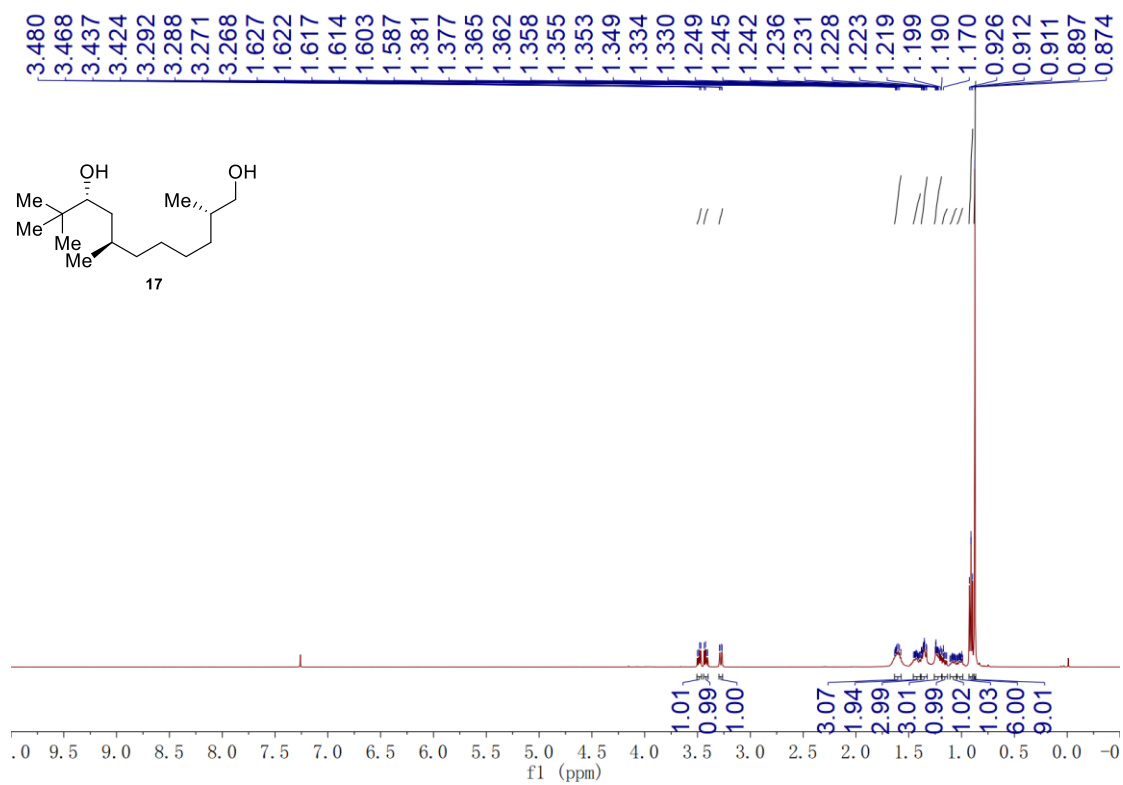

$^{13}\text{C}$  NMR Spectrum of **17** (125 MHz,  $\text{CDCl}_3$ )

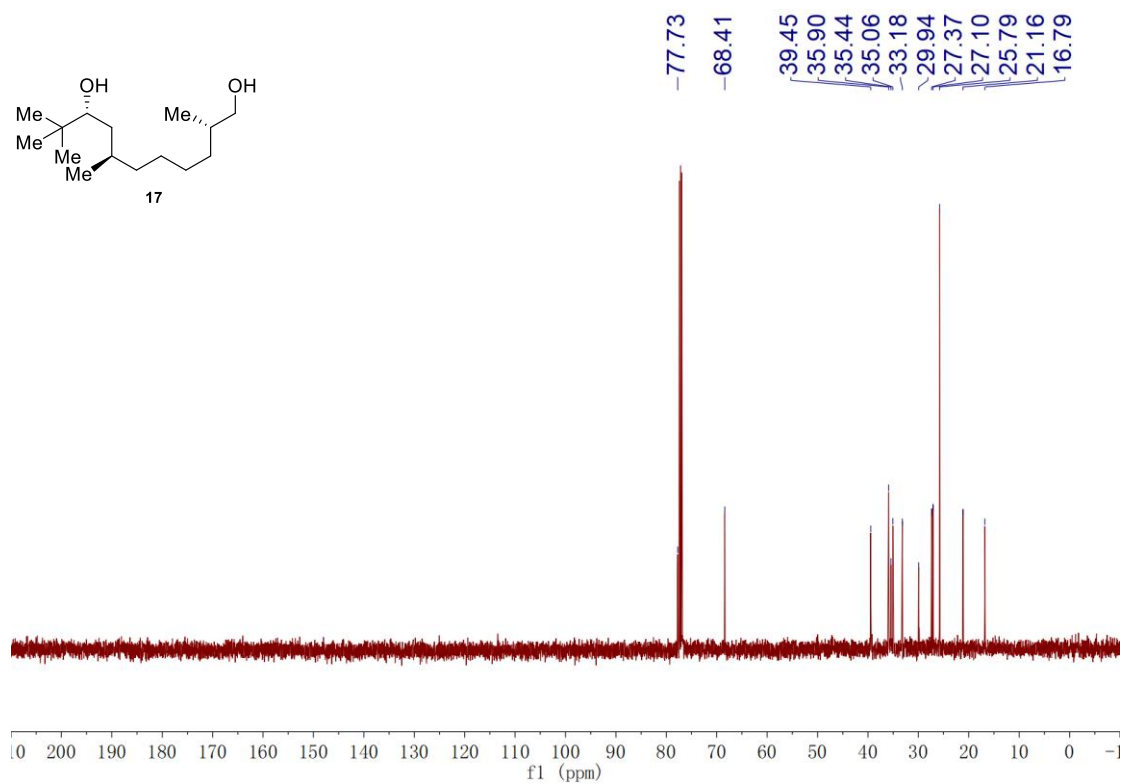

$^1\text{H}$  NMR Spectrum of **S14** (400 MHz,  $\text{CDCl}_3$ )

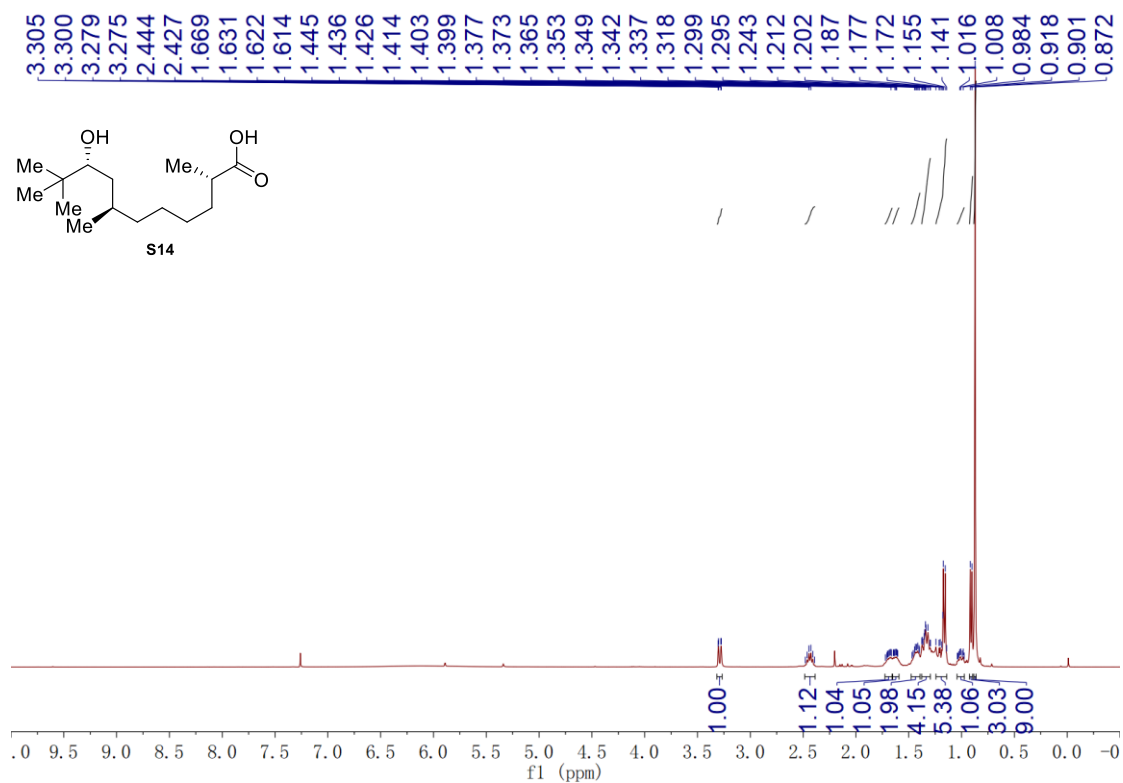

$^{13}\text{C}$  NMR Spectrum of **S14** (100 MHz,  $\text{CDCl}_3$ )

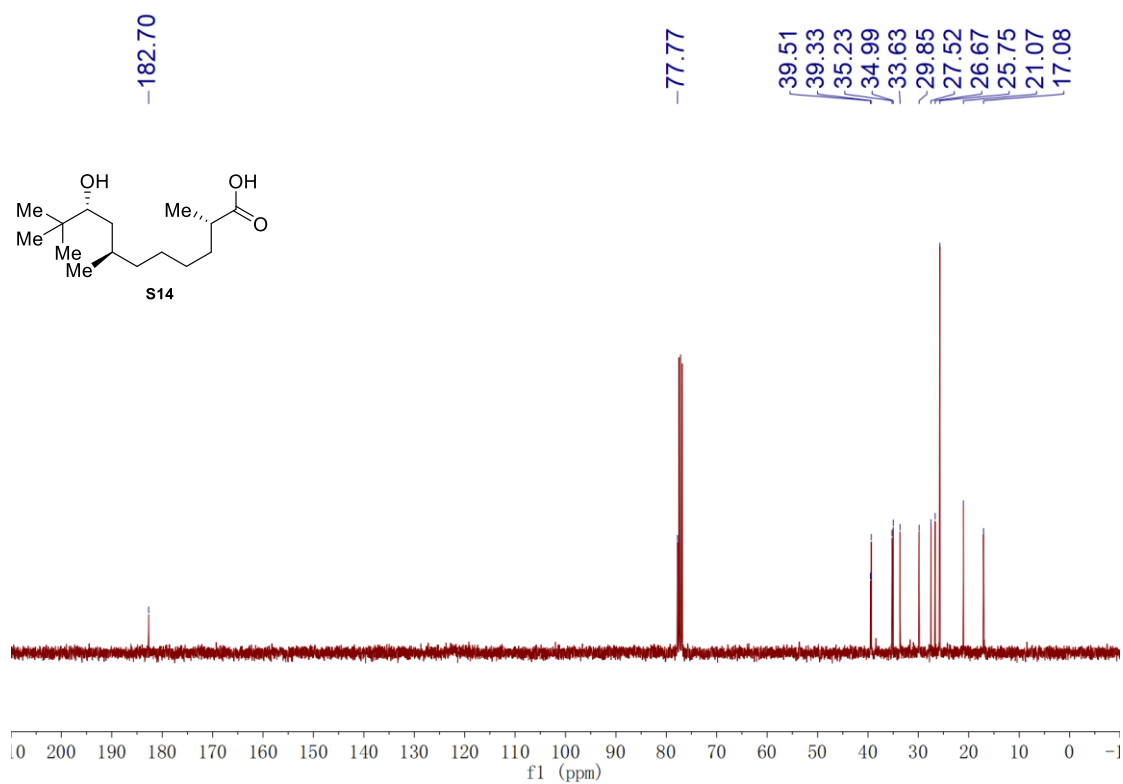

$^1\text{H}$  NMR Spectrum of **18** (400 MHz,  $\text{CDCl}_3$ )

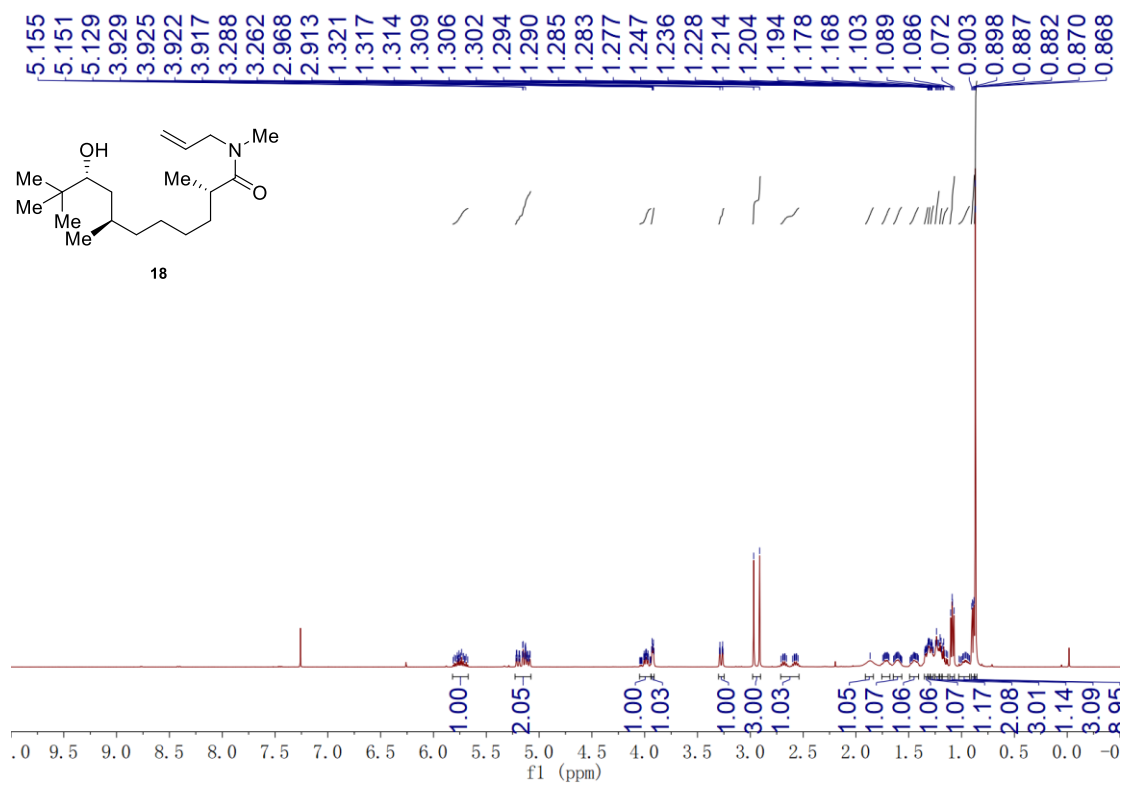

$^{13}\text{C}$  NMR Spectrum of **18** (100 MHz,  $\text{CDCl}_3$ )

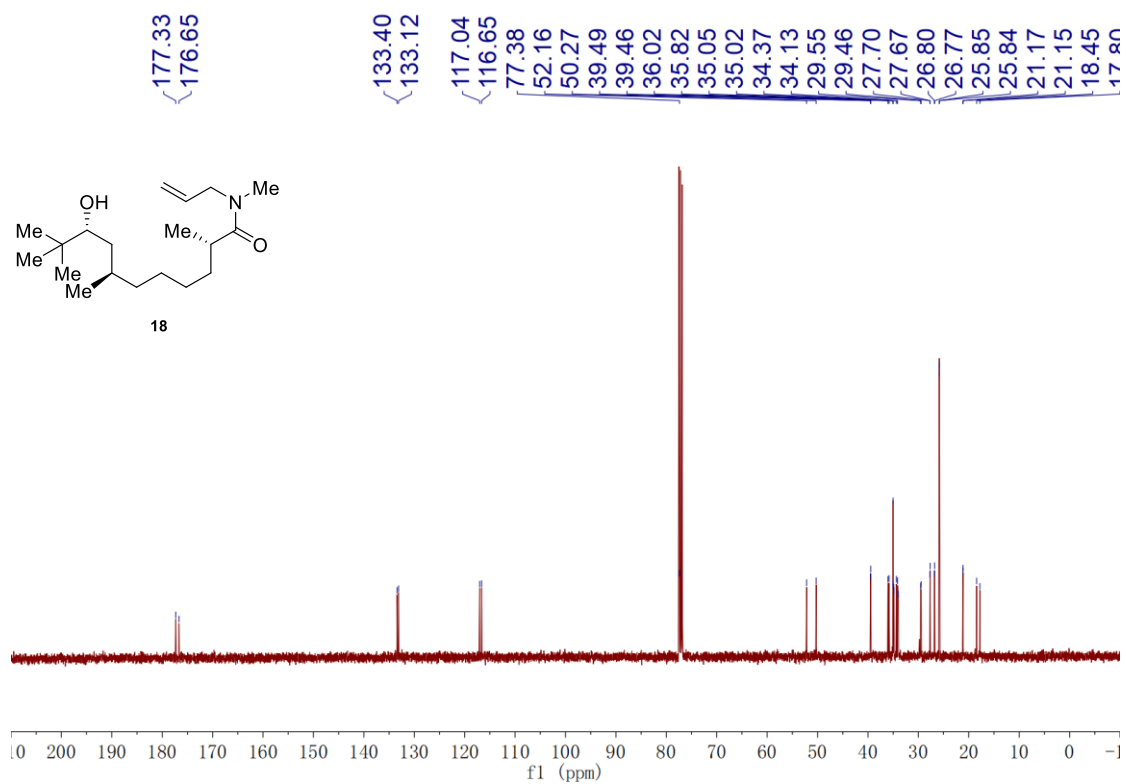

$^1\text{H}$  NMR Spectrum of **19** (400 MHz,  $\text{CDCl}_3$ )

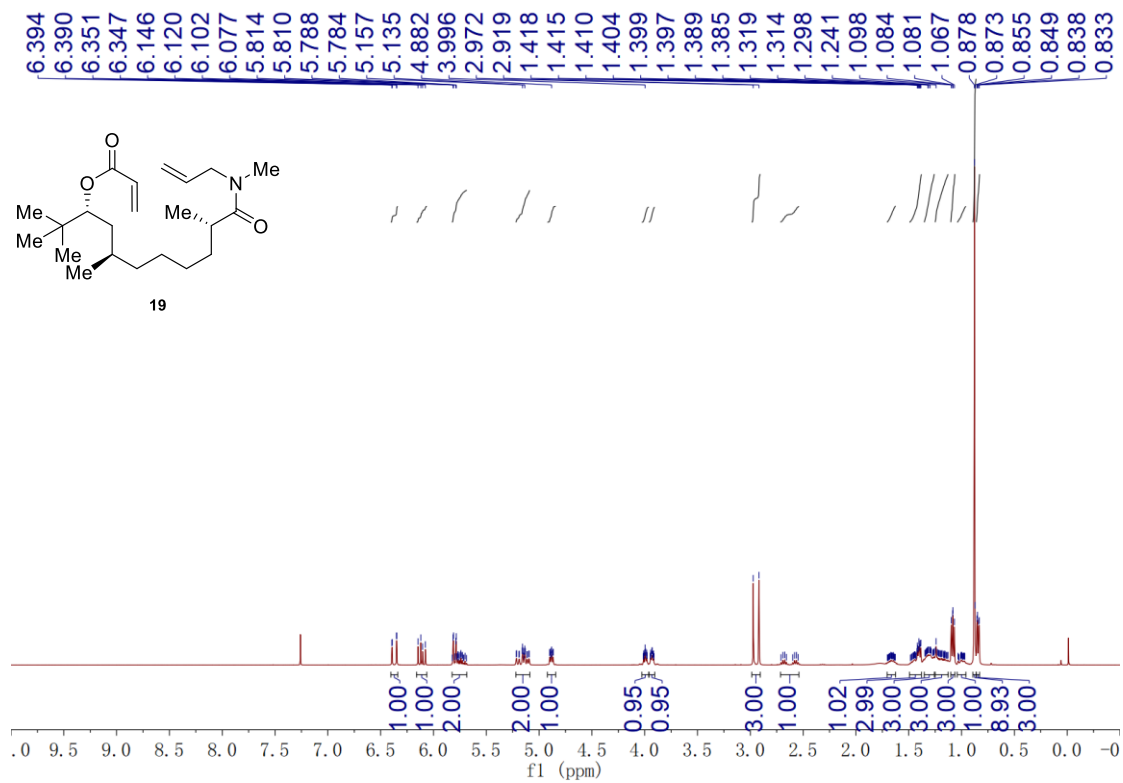

$^{13}\text{C}$  NMR Spectrum of **19** (100 MHz,  $\text{CDCl}_3$ )

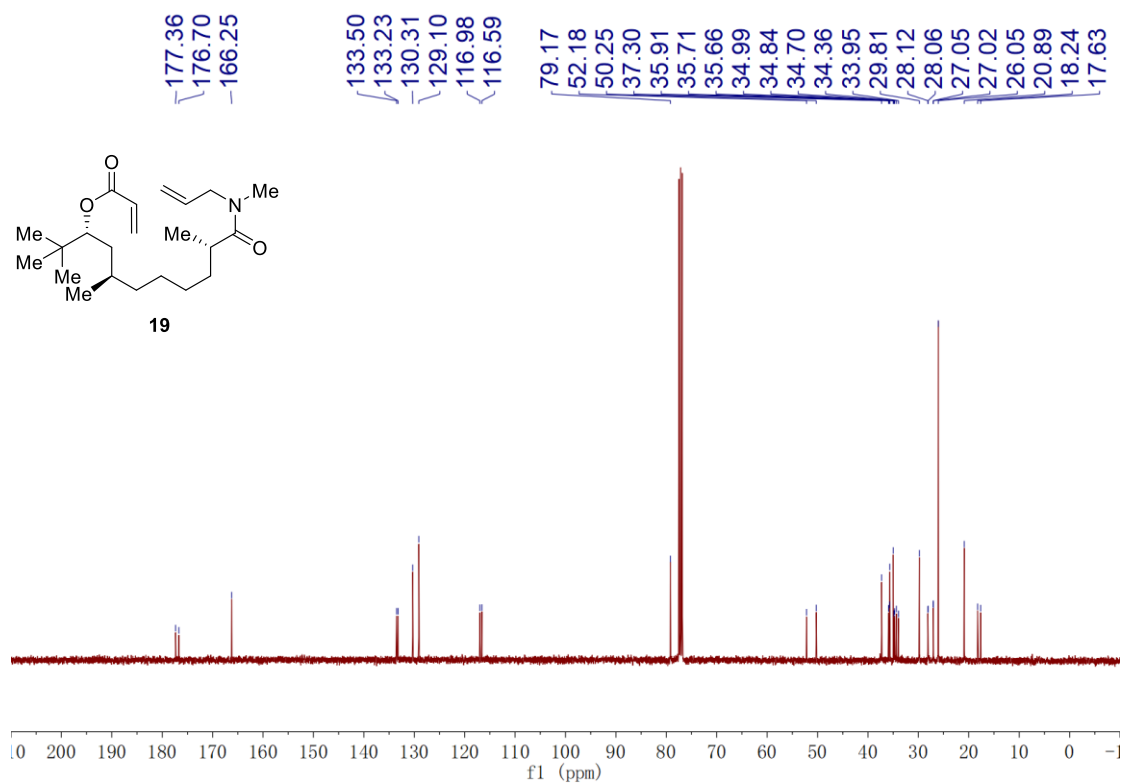

**Chemical structure of 1a:** CC1(C)C(C)C(C)CCN(C)C(=O)C=C(C)C(=O)O1

**<sup>1</sup>H NMR spectrum (CDCl<sub>3</sub>):**

**Chemical shifts (ppm):** 6.776, 6.741, 4.961, 4.955, 4.933, 4.927, 3.113, 3.107, 3.098, 3.095, 3.012, 3.011, 2.989, 2.987, 1.728, 1.700, 1.693, 1.449, 1.446, 1.398, 1.390, 1.384, 1.368, 1.362, 1.322, 1.318, 1.311, 1.306, 1.302, 1.290, 1.196, 1.191, 1.175, 1.156, 1.140, 0.926, 0.909, 0.902, 0.885, 0.878.

**Integrations:** 1.00, 1.10, 1.05, 4.10, 1.06, 1.07, 2.10, 0.97, 1.00, 2.28, 2.09, 2.28, 3.04, 0.97, 12.12.

Chemical structure of **1a** is shown. The structure is a 10-membered lactam with a methyl group at C2 (2S), a methyl group at C7 (7R), and a methyl group at C9 (9R). The spectrum shows peaks from 0 to 200 ppm. Key peaks are labeled: 176.25, 173.30, 133.44, 104.23, 78.03 CDCl<sub>3</sub>, 77.91, 77.71 CDCl<sub>3</sub>, 77.39 CDCl<sub>3</sub>, 37.69, 37.06, 35.68, 35.38, 34.33, 34.21, 31.32, 30.52, 27.59, 27.44, 26.67, 20.11, 17.21.

$^1\text{H}$  NMR Spectrum of **20** (400 MHz,  $\text{CDCl}_3$ )

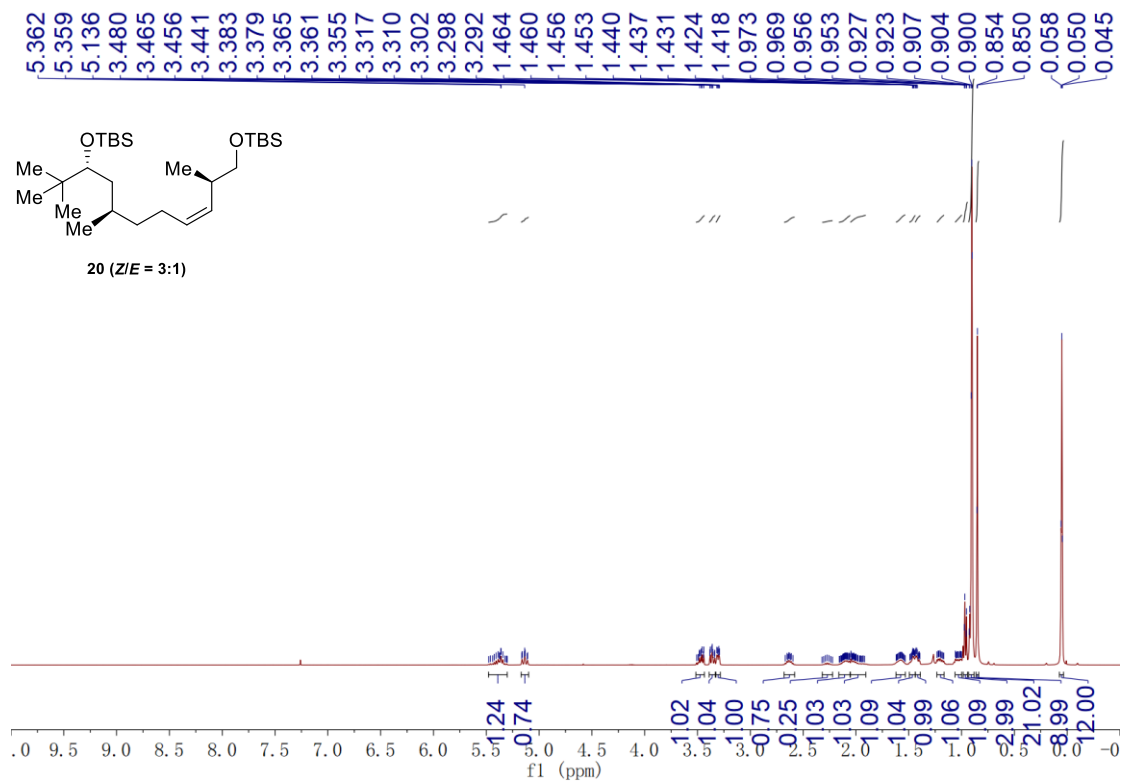

$^{13}\text{C}$  NMR Spectrum of **20** (100 MHz,  $\text{CDCl}_3$ )

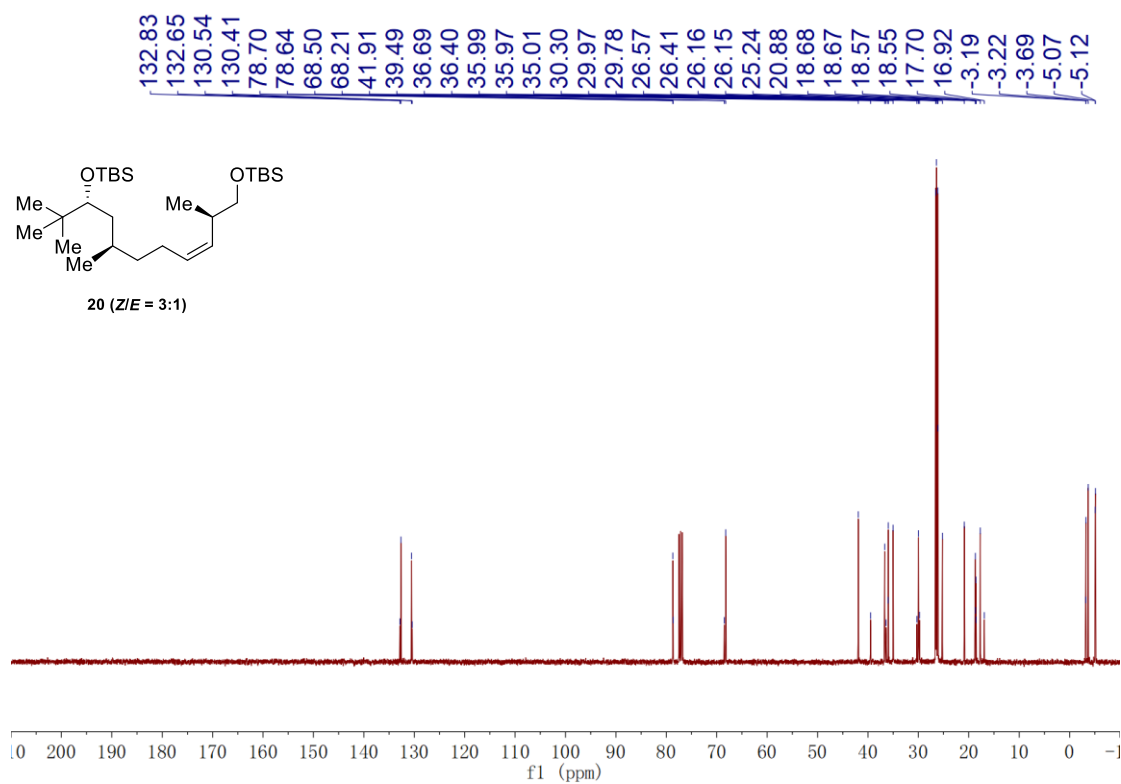



$^1\text{H}$  NMR Spectrum of **21** (500 MHz,  $\text{CDCl}_3$ )

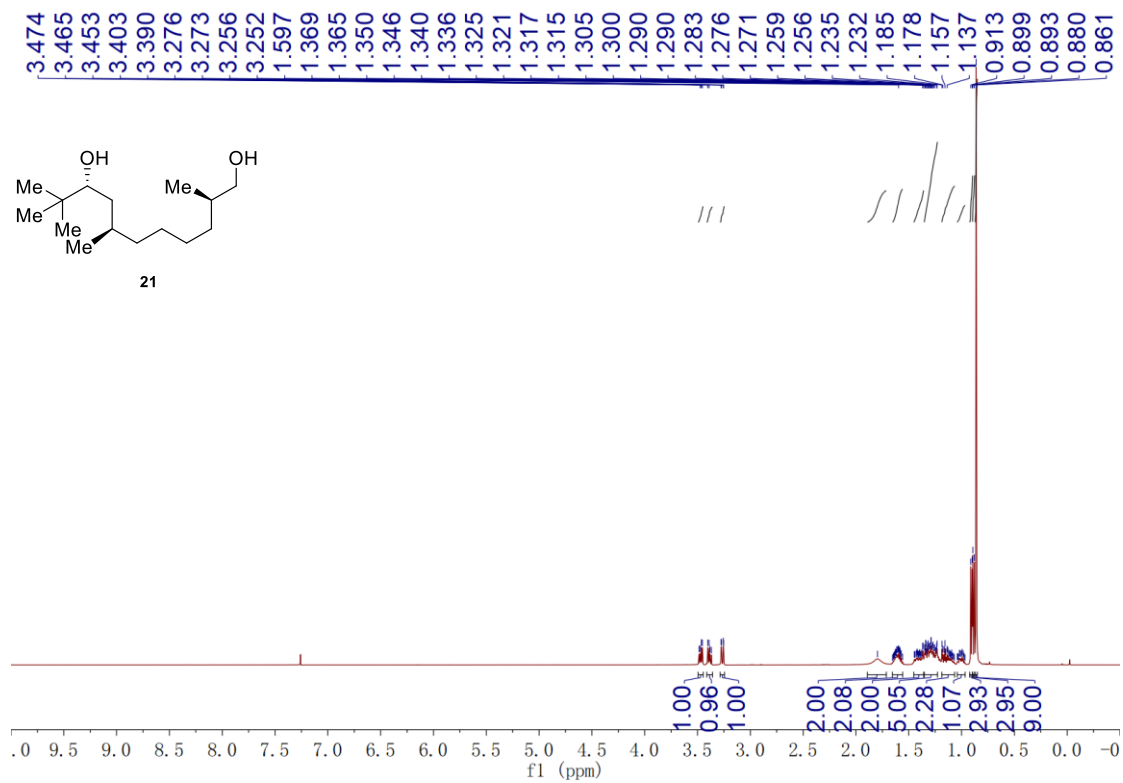

$^{13}\text{C}$  NMR Spectrum of **21** (125 MHz,  $\text{CDCl}_3$ )

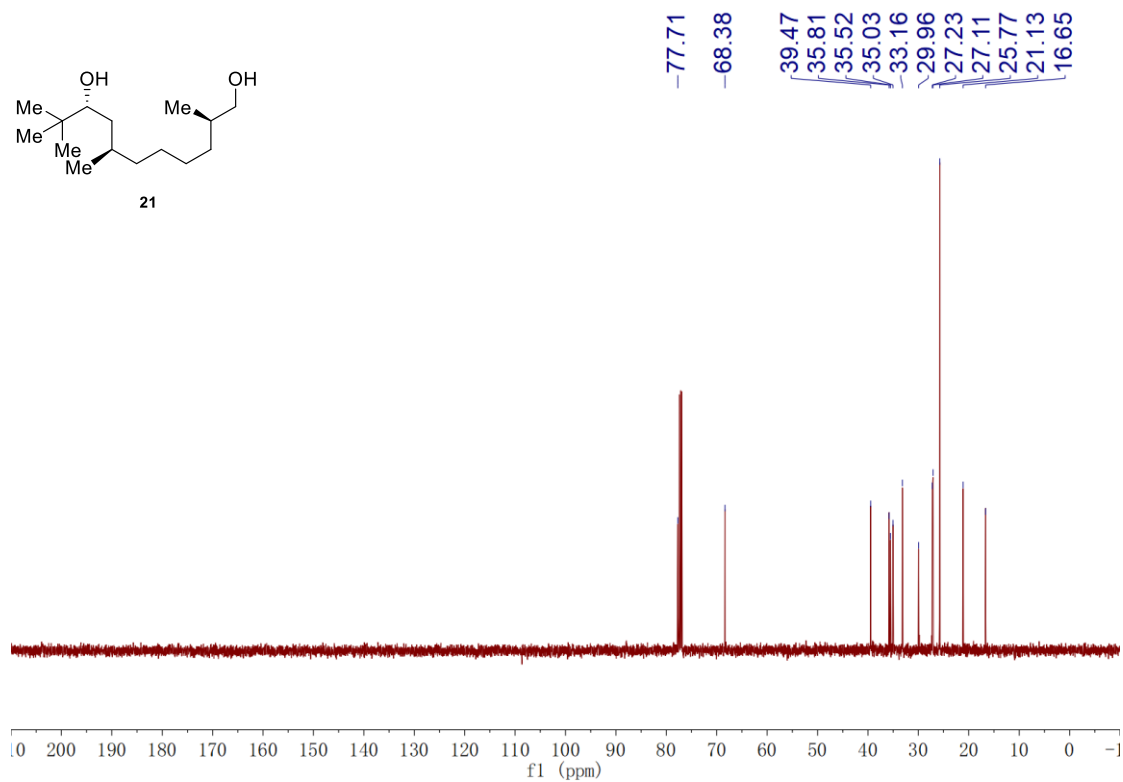

$^1\text{H}$  NMR Spectrum of **S16** (400 MHz,  $\text{CDCl}_3$ )

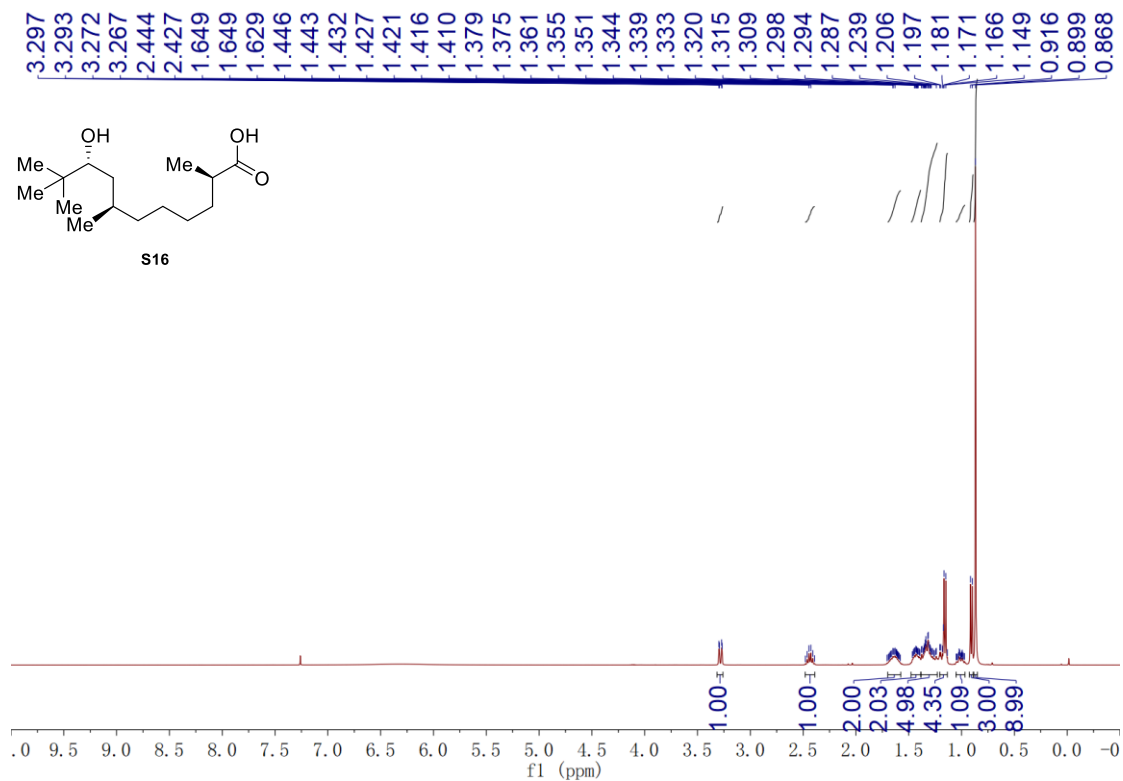

$^{13}\text{C}$  NMR Spectrum of **S16** (100 MHz,  $\text{CDCl}_3$ )

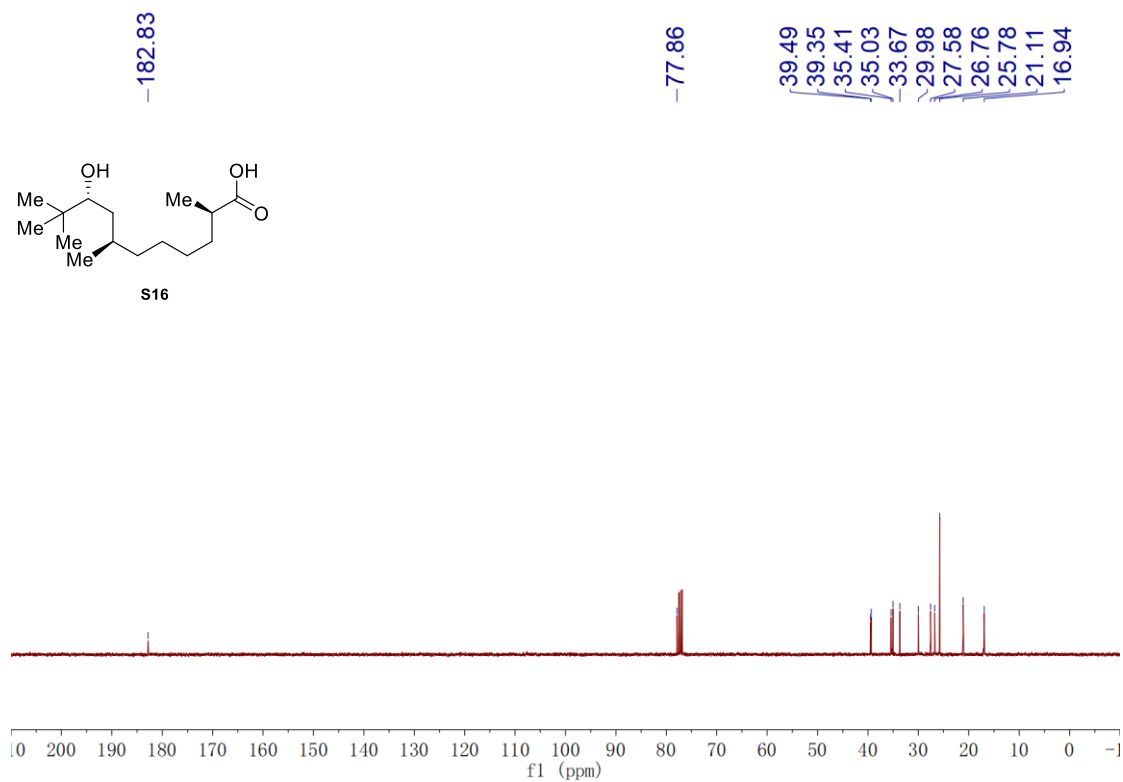

$^1\text{H}$  NMR Spectrum of **22** (400 MHz,  $\text{CDCl}_3$ )

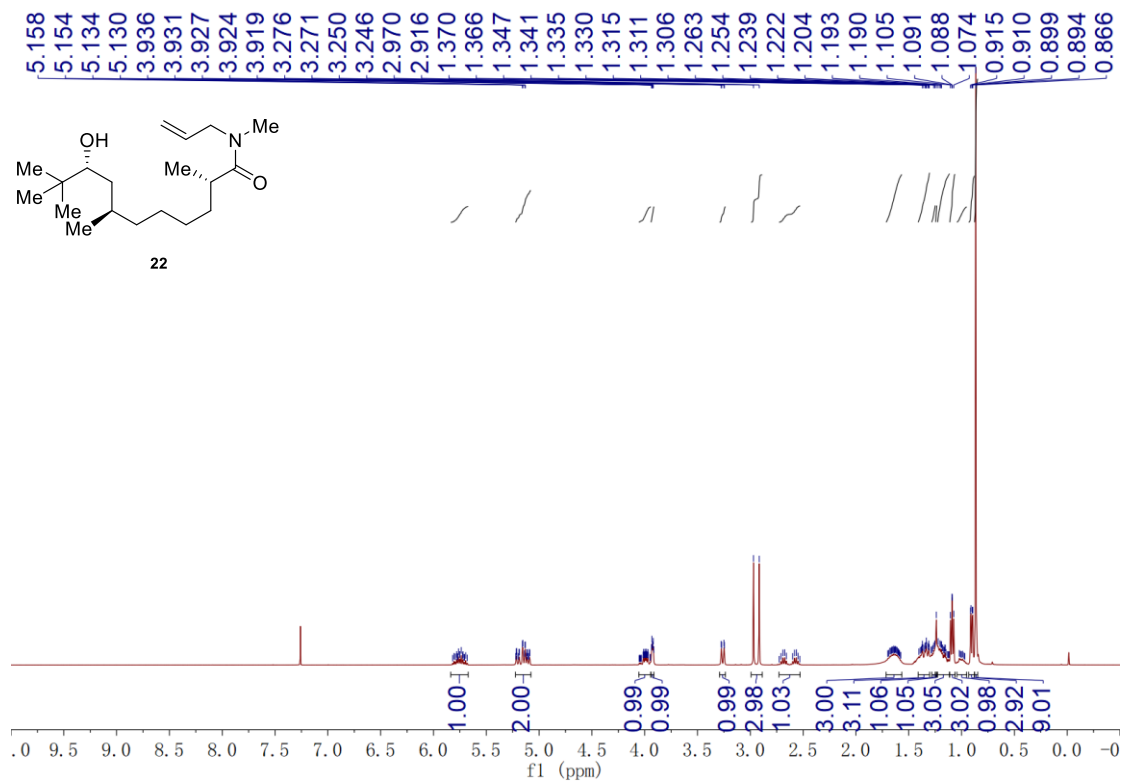

$^{13}\text{C}$  NMR Spectrum of **22** (100 MHz,  $\text{CDCl}_3$ )

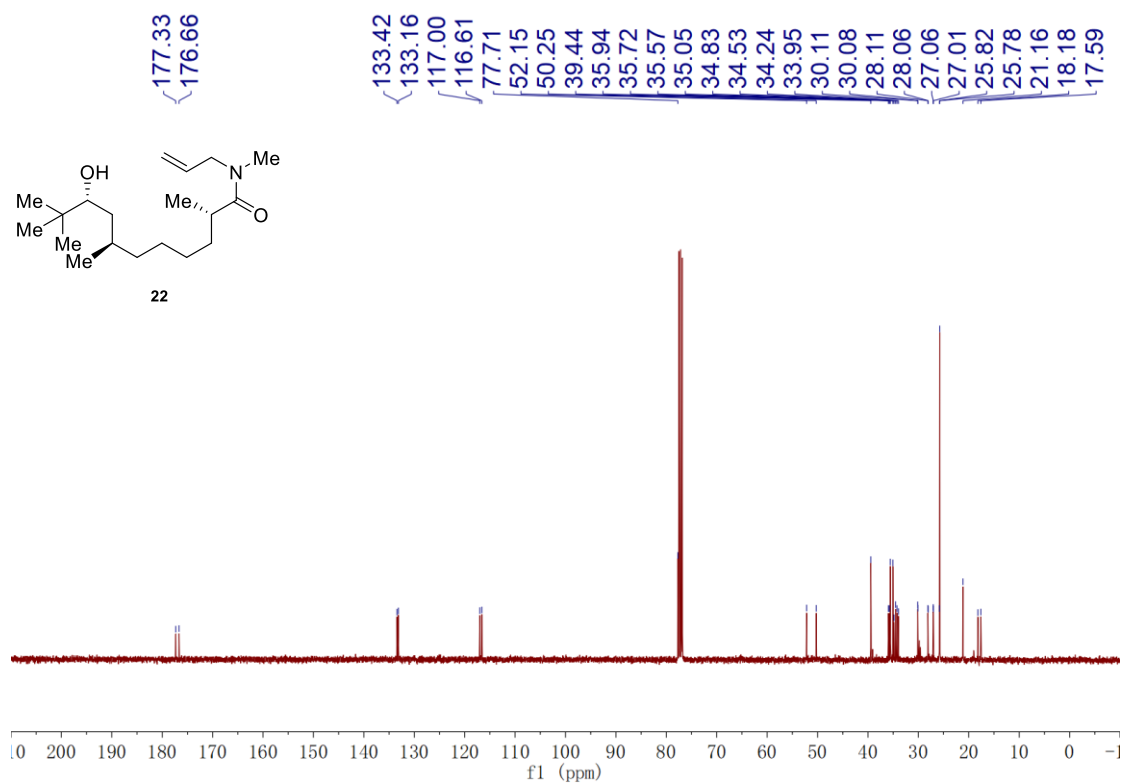

$^1\text{H}$  NMR Spectrum of **23** (400 MHz,  $\text{CDCl}_3$ )

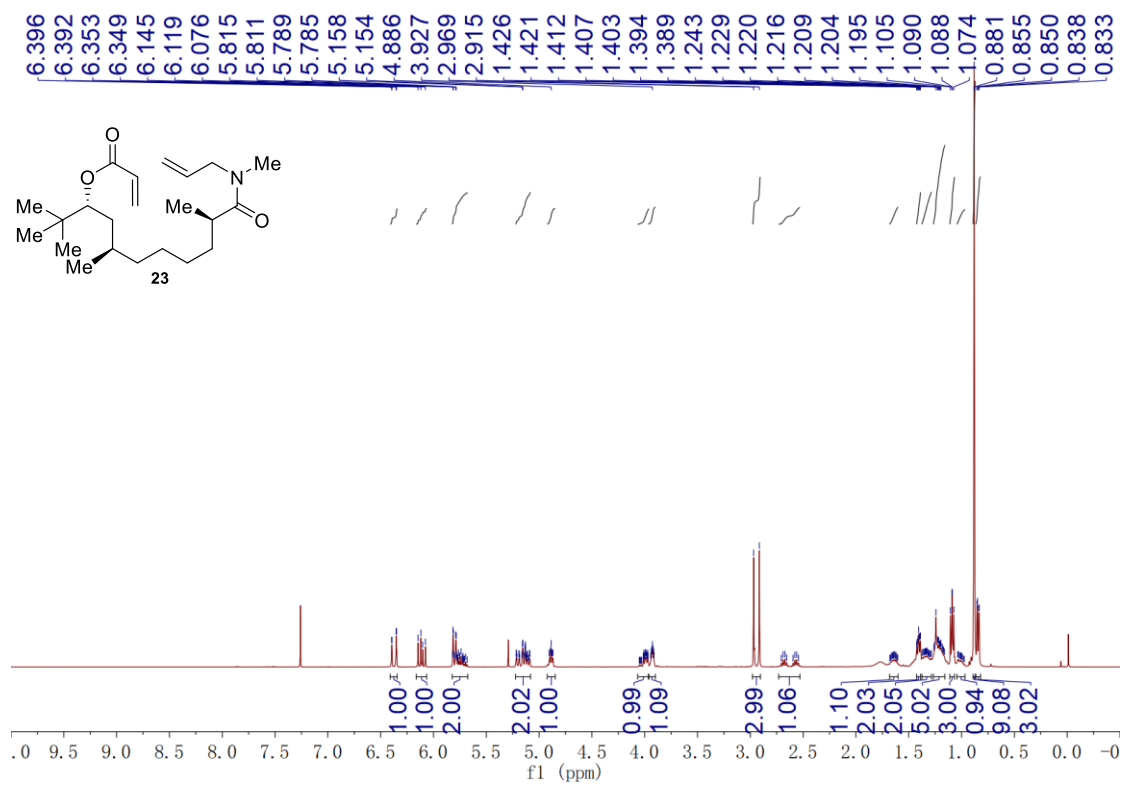

$^{13}\text{C}$  NMR Spectrum of **23** (100 MHz,  $\text{CDCl}_3$ )

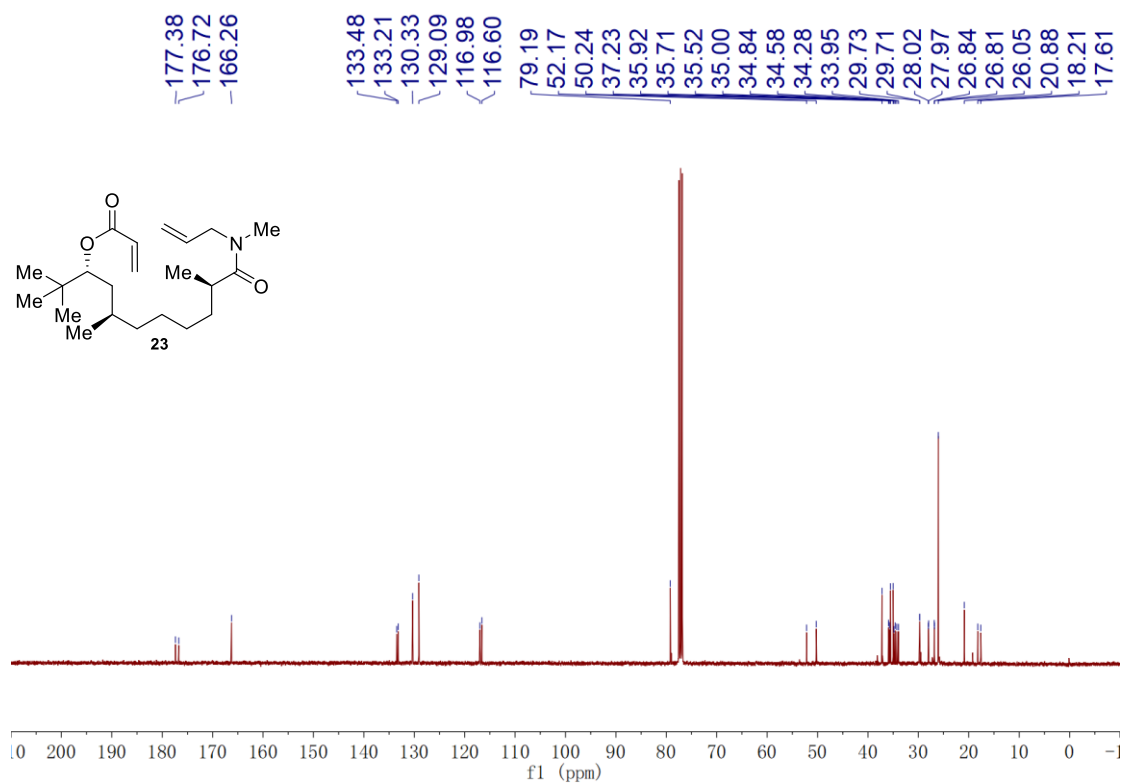

$^1\text{H}$  NMR Spectrum of (2*R*,7*R*,9*R*)-laingolide A (**1b**) (500 MHz,  $\text{CDCl}_3$ )

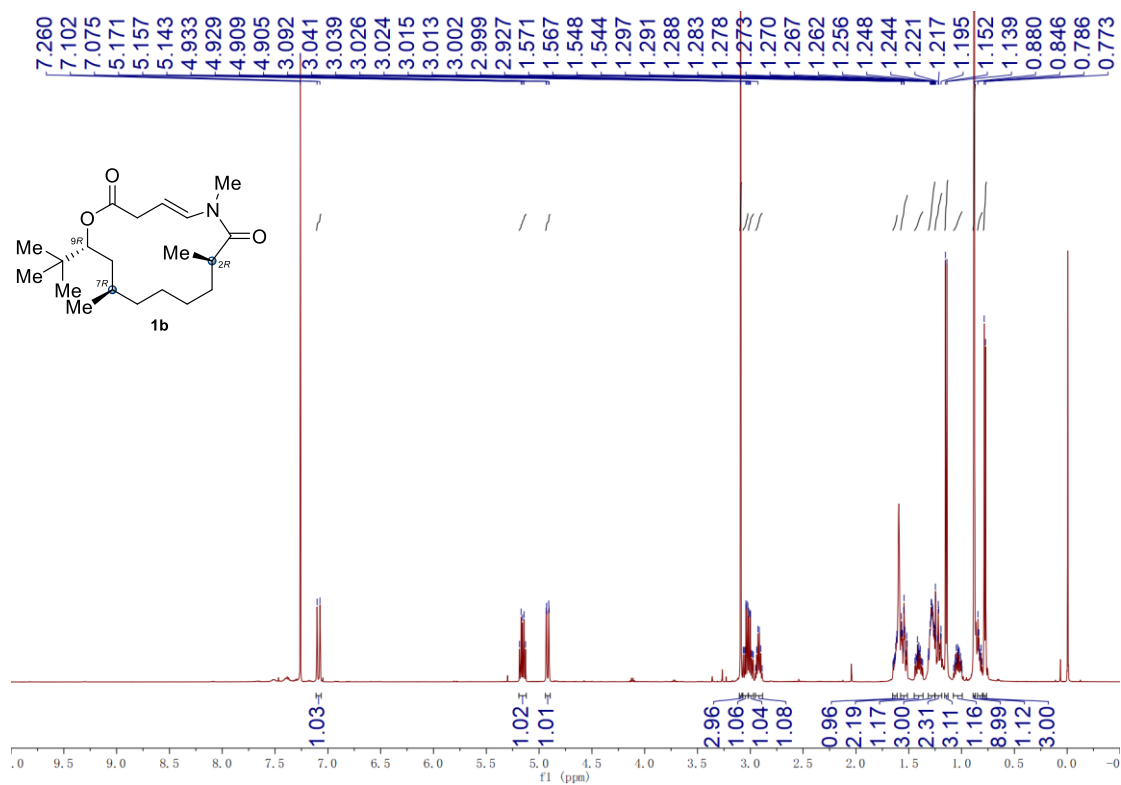

$^{13}\text{C}$  NMR Spectrum of (2*R*,7*R*,9*R*)-laingolide A (**1b**) (125 MHz,  $\text{CDCl}_3$ )

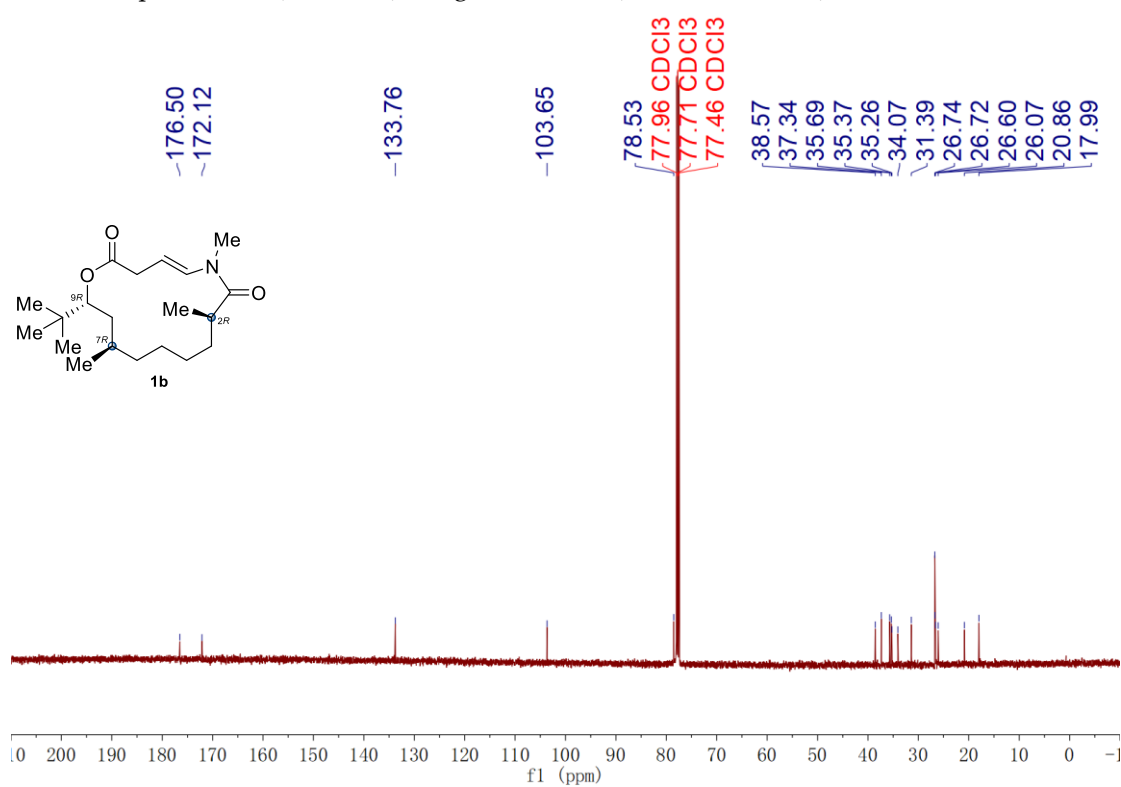

<sup>1</sup>H NMR Spectrum of **24** (400 MHz, CDCl<sub>3</sub>)

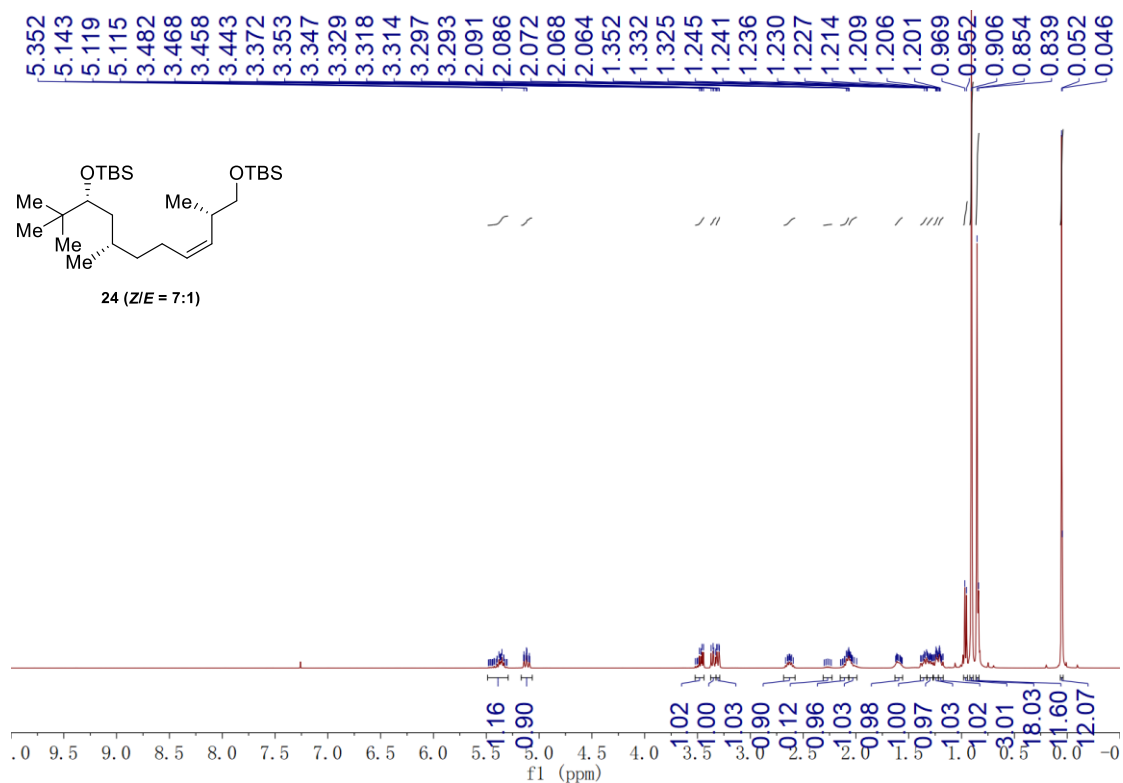

<sup>13</sup>C NMR Spectrum of **24** (100 MHz, CDCl<sub>3</sub>)

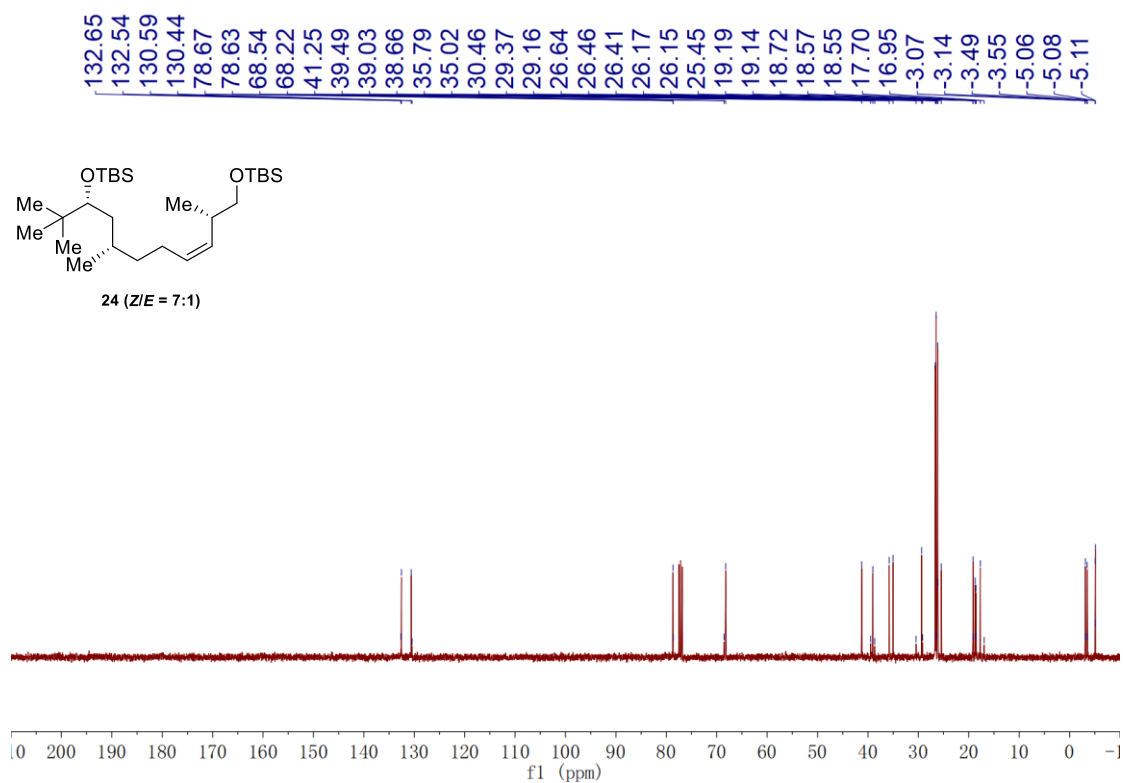

$^1\text{H}$  NMR Spectrum of **25** (400 MHz,  $\text{CDCl}_3$ )

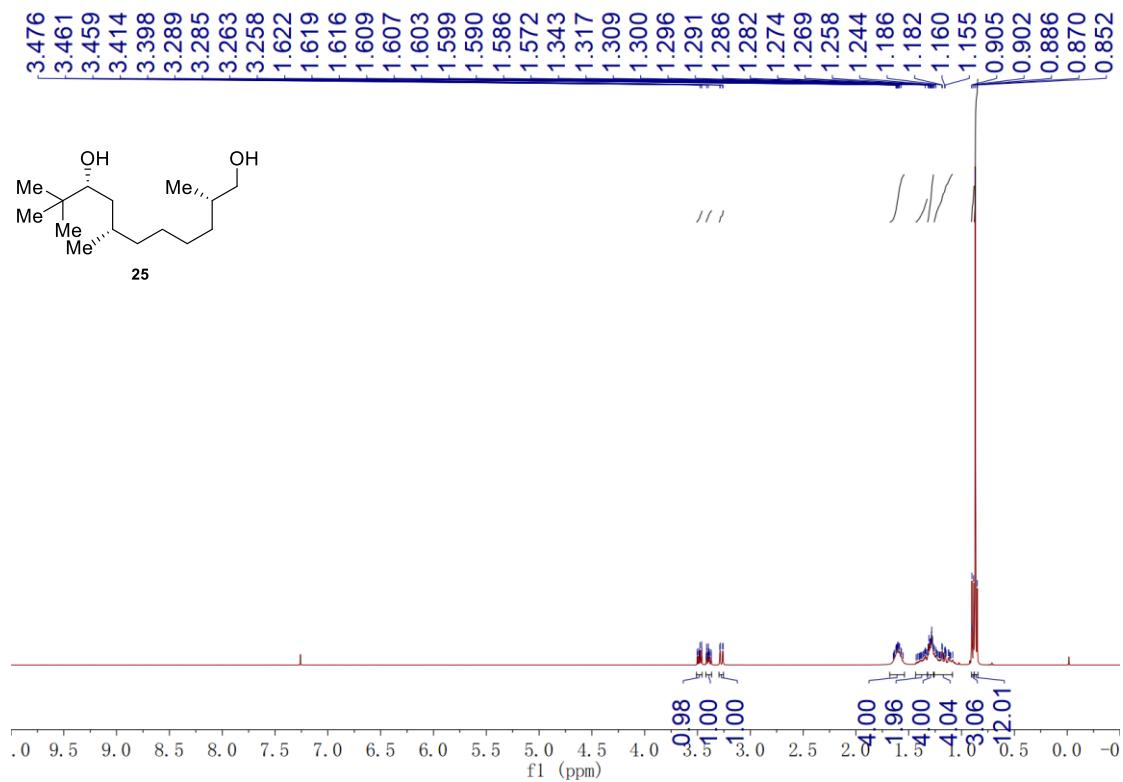

$^{13}\text{C}$  NMR Spectrum of **25** (100 MHz,  $\text{CDCl}_3$ )

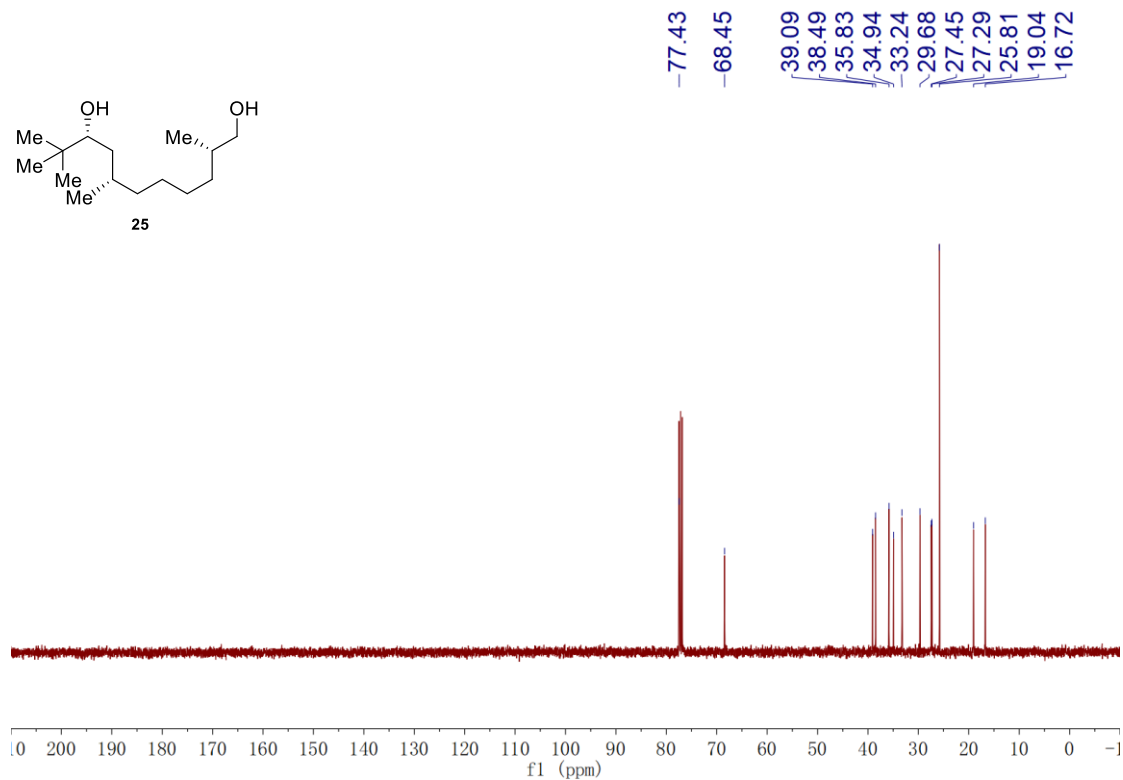

$^1\text{H}$  NMR Spectrum of **S18** (500 MHz,  $\text{CDCl}_3$ )

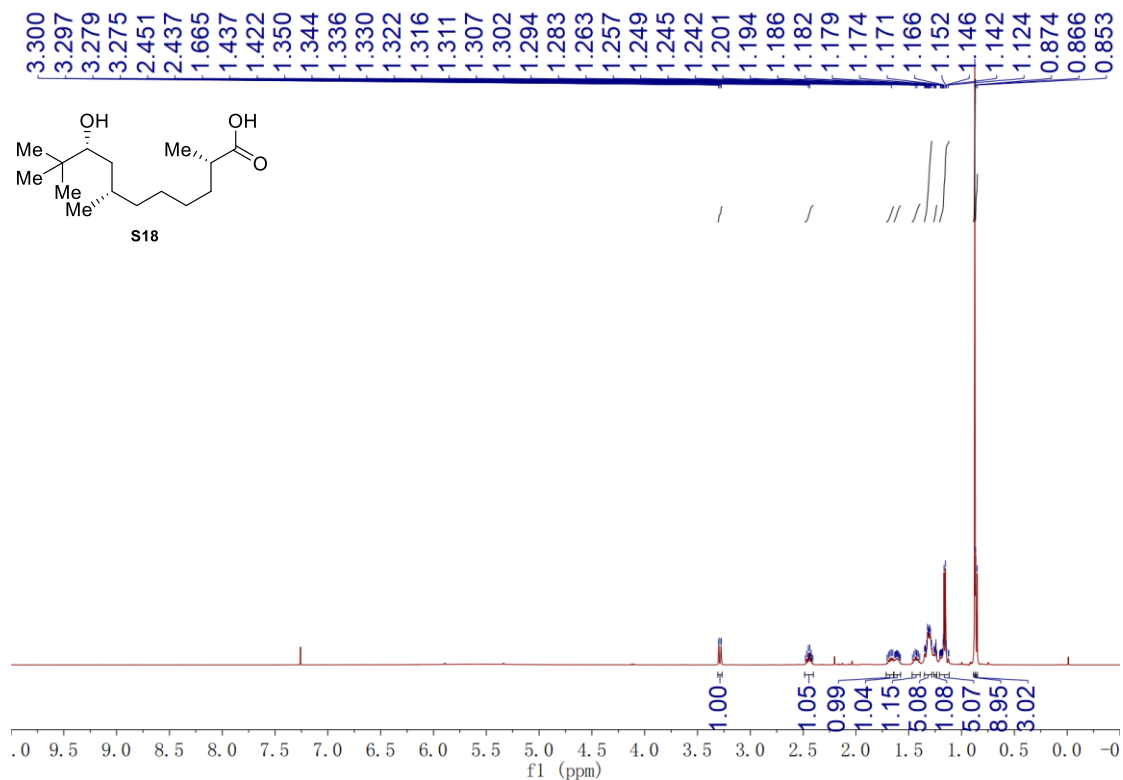

$^{13}\text{C}$  NMR Spectrum of **S18** (125 MHz,  $\text{CDCl}_3$ )

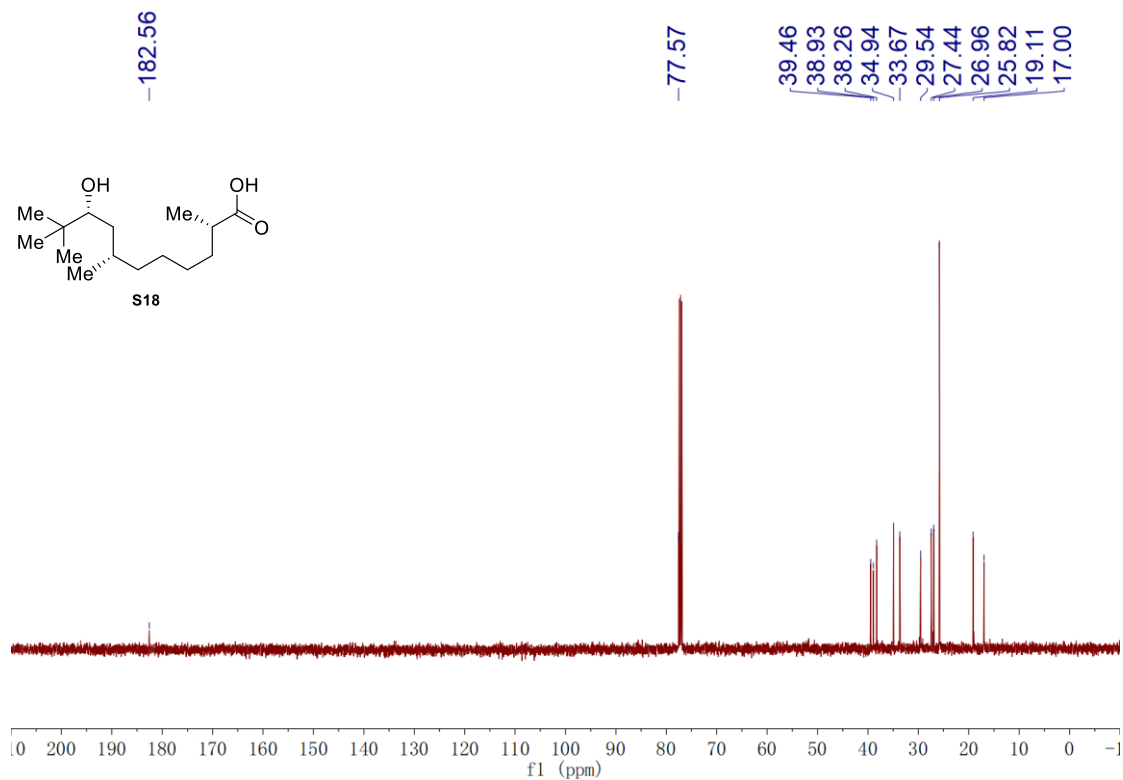



$^1\text{H}$  NMR Spectrum of **26** (500 MHz,  $\text{CDCl}_3$ )

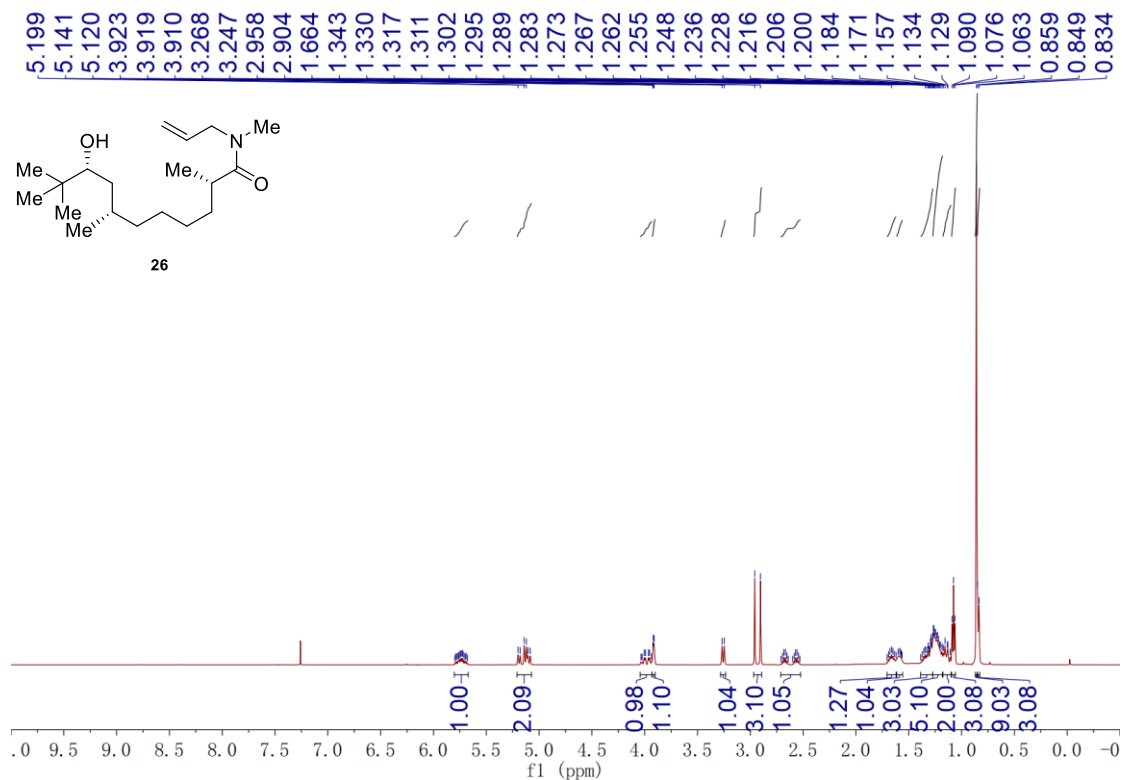

$^{13}\text{C}$  NMR Spectrum of **26** (125 MHz,  $\text{CDCl}_3$ )

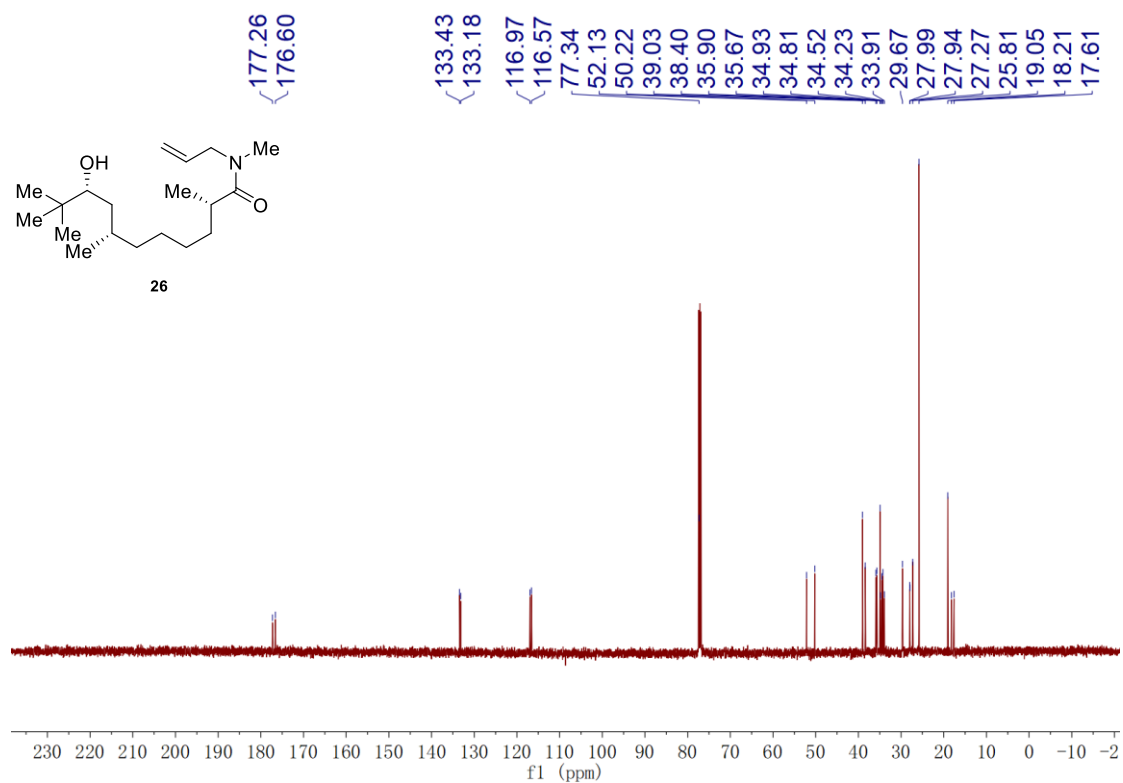

$^1\text{H}$  NMR Spectrum of **27** (500 MHz,  $\text{CDCl}_3$ )

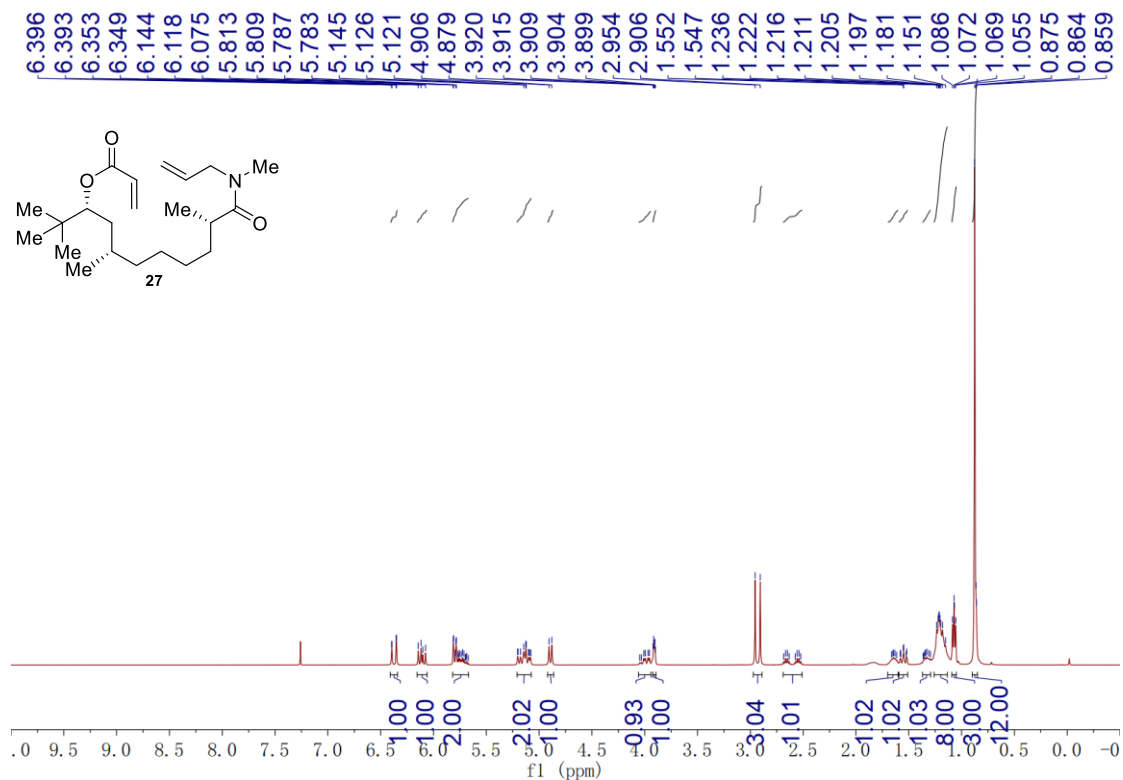

$^{13}\text{C}$  NMR Spectrum of **27** (125 MHz,  $\text{CDCl}_3$ )

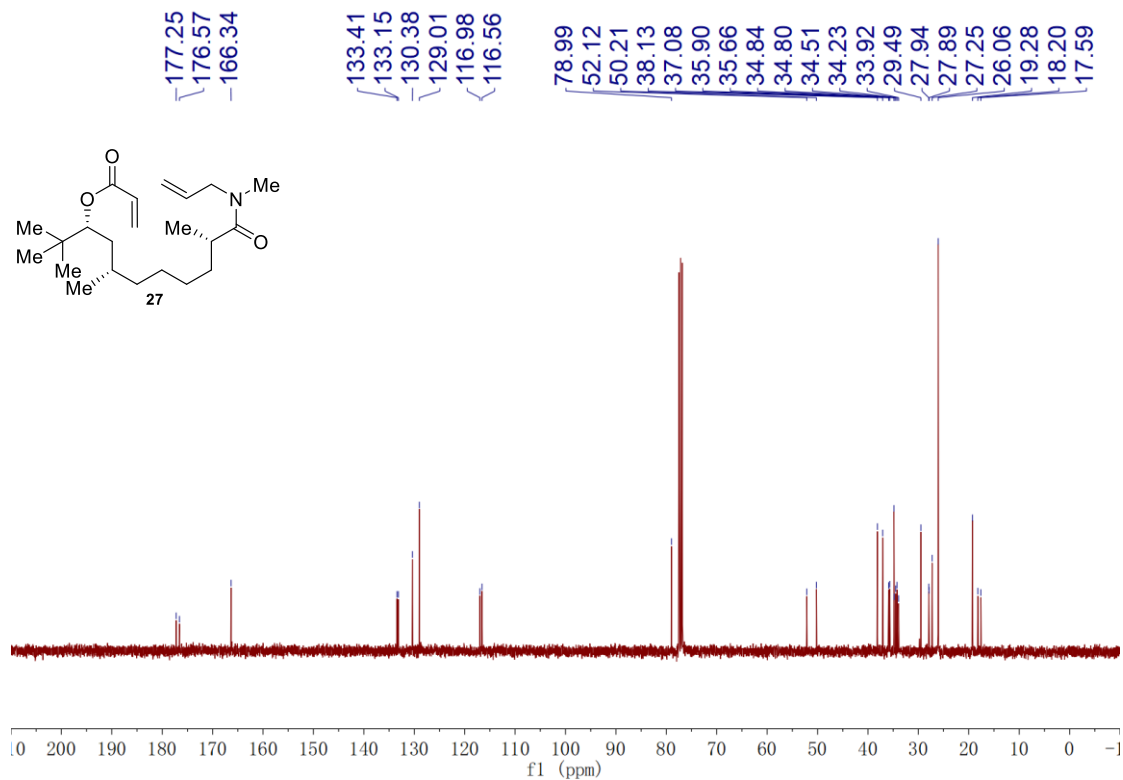

$^1\text{H}$  NMR Spectrum of (2*S*,7*S*,9*R*)-laingolide A (**1c**) (500 MHz,  $\text{CDCl}_3$ )

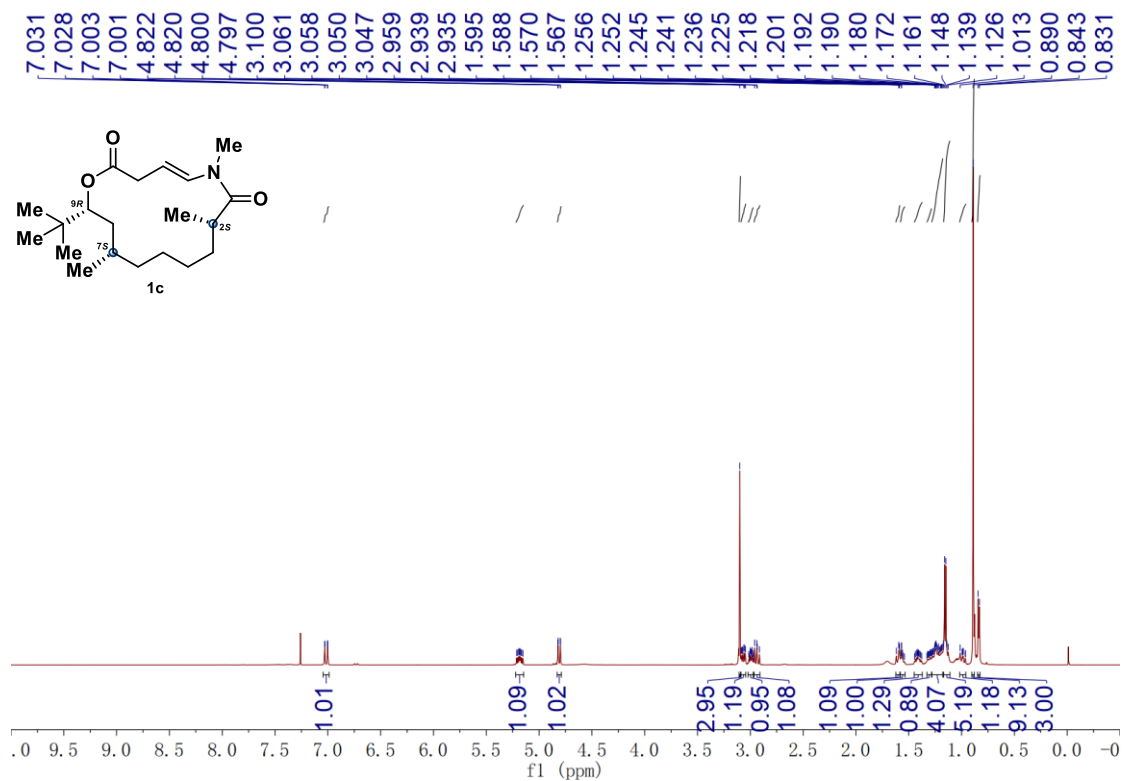

$^{13}\text{C}$  NMR Spectrum of (2*S*,7*S*,9*R*)-laingolide A (**1c**) (125 MHz,  $\text{CDCl}_3$ )

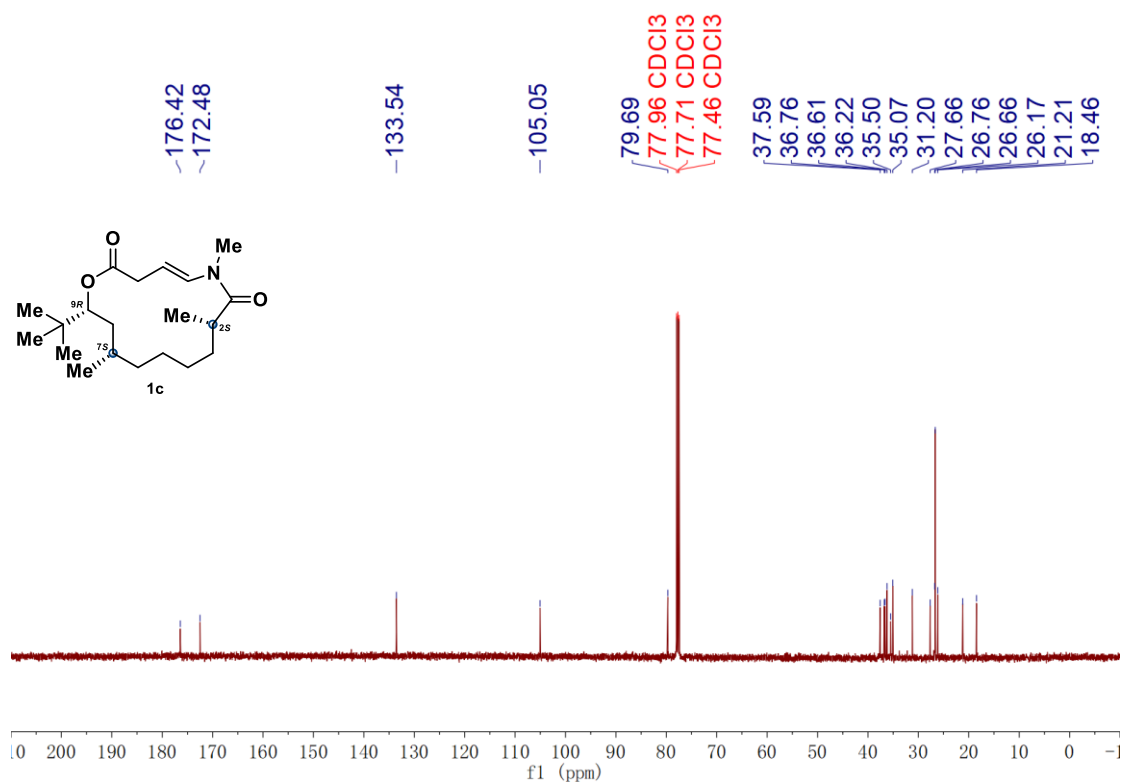

<sup>1</sup>H NMR Spectrum of **28** (400 MHz, CDCl<sub>3</sub>)

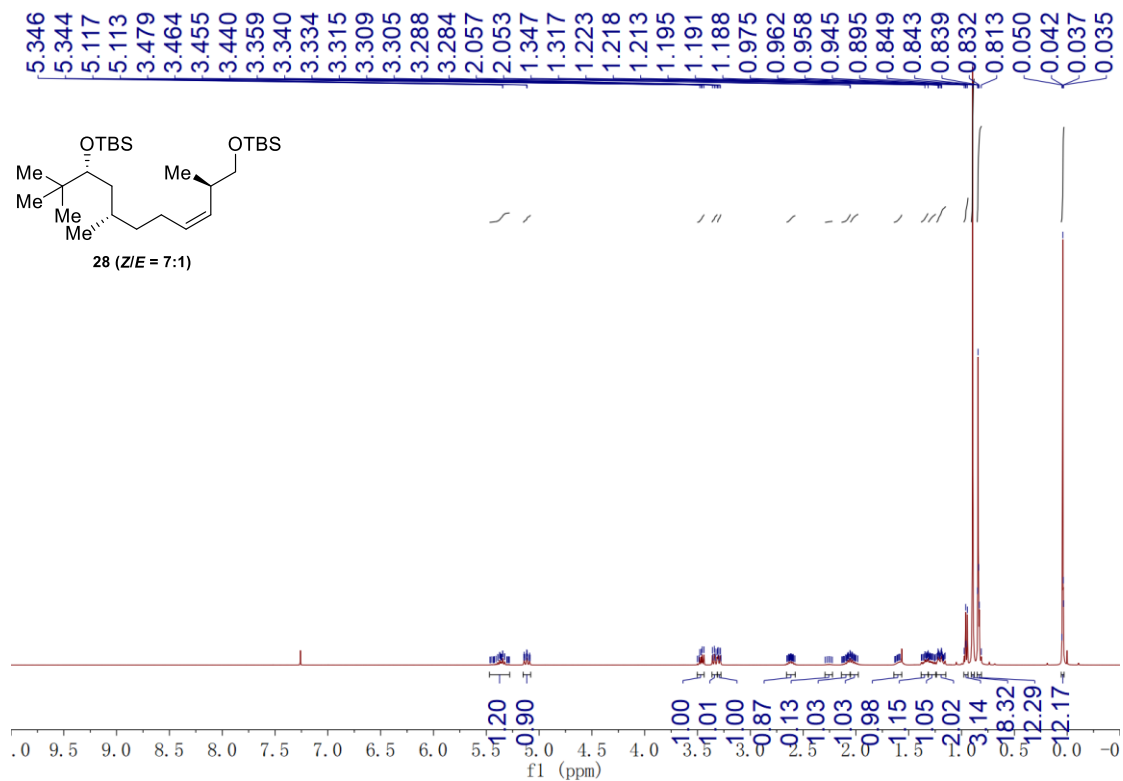

<sup>13</sup>C NMR Spectrum of **28** (100 MHz, CDCl<sub>3</sub>)

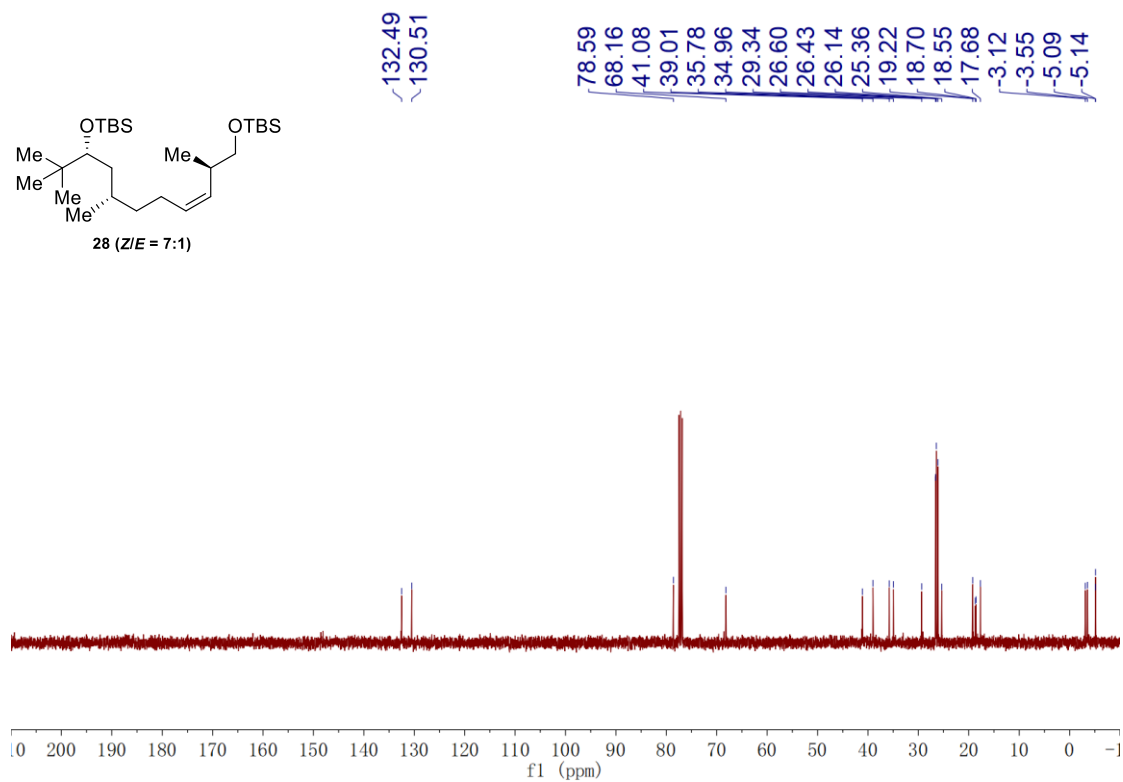

$^1\text{H}$  NMR Spectrum of **29** (400 MHz,  $\text{CDCl}_3$ )

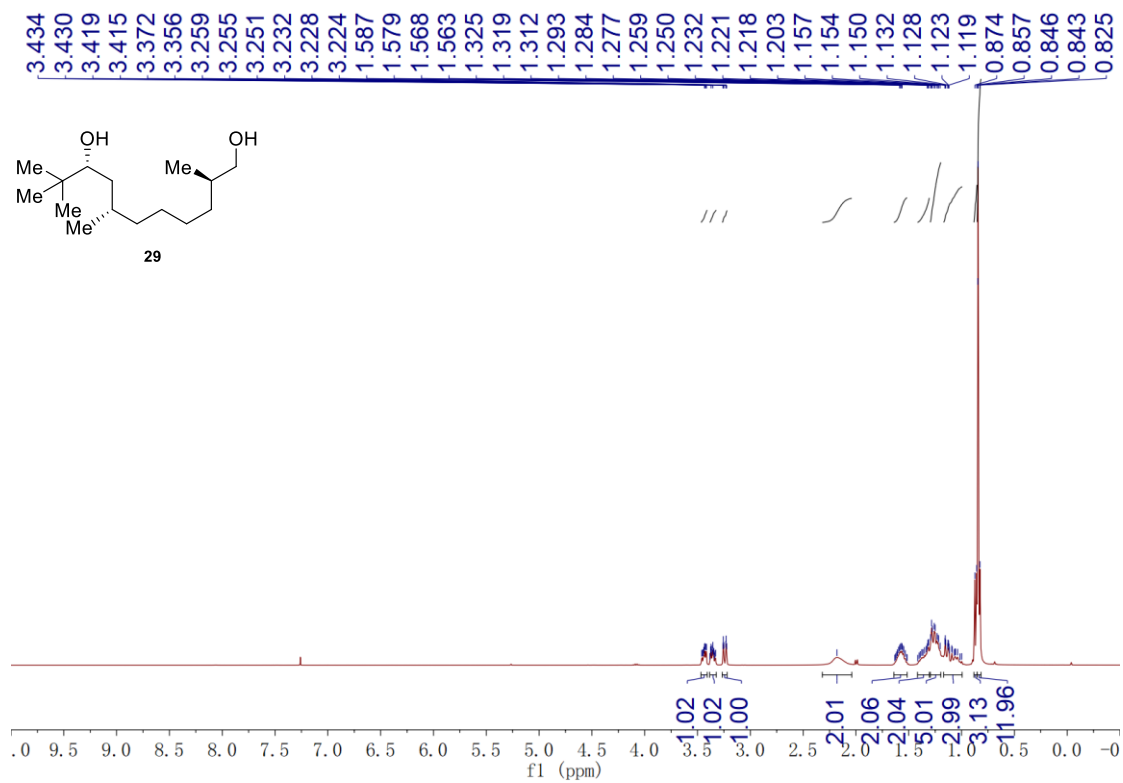

$^{13}\text{C}$  NMR Spectrum of **29** (100 MHz,  $\text{CDCl}_3$ )

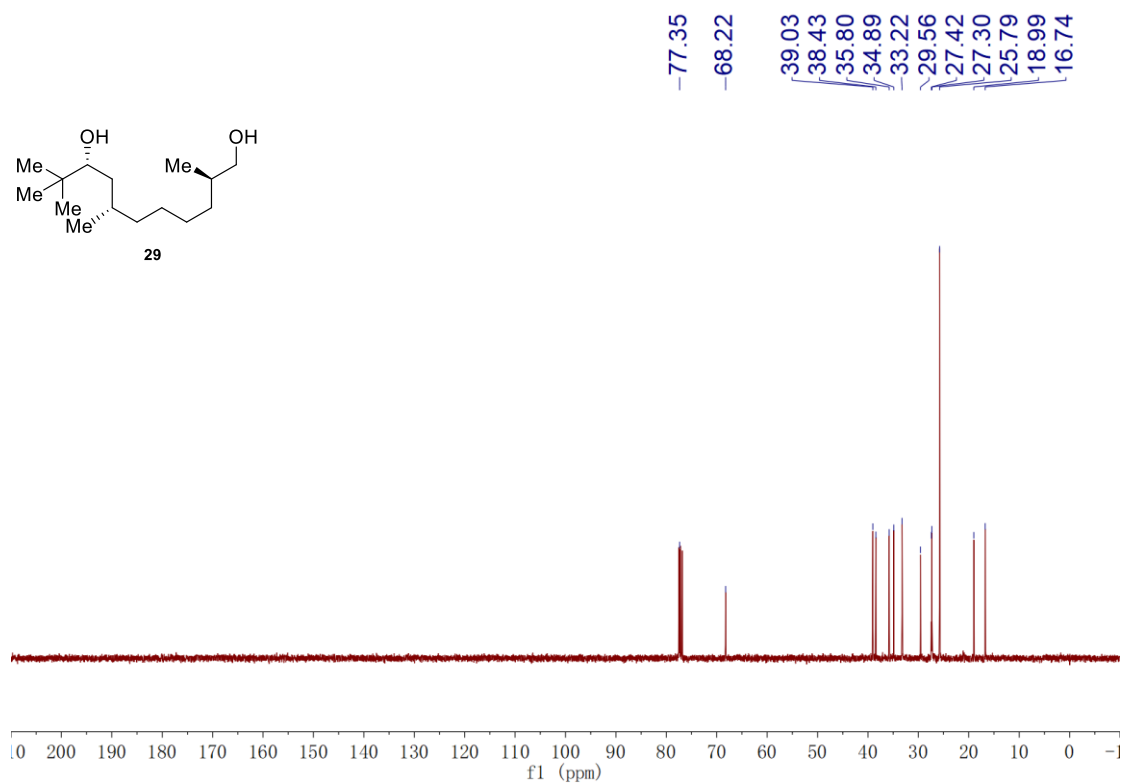

$^1\text{H}$  NMR Spectrum of **S20** (500 MHz,  $\text{CDCl}_3$ )

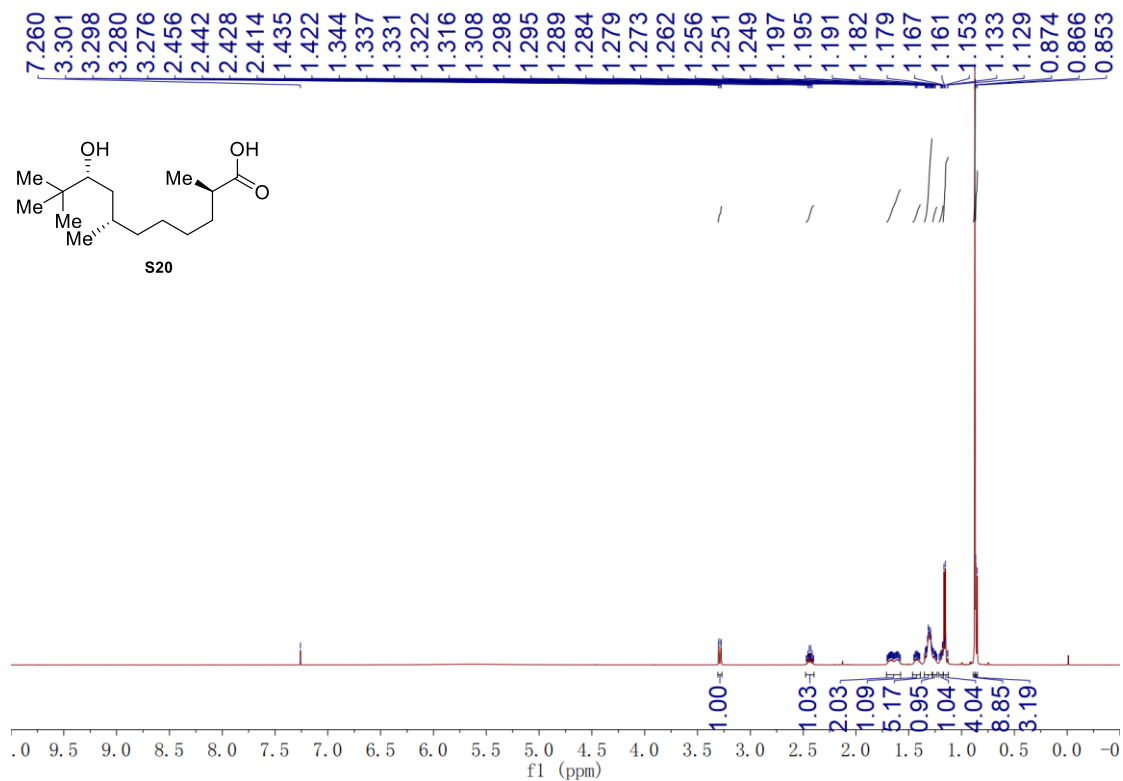

$^{13}\text{C}$  NMR Spectrum of **S20** (125 MHz,  $\text{CDCl}_3$ )

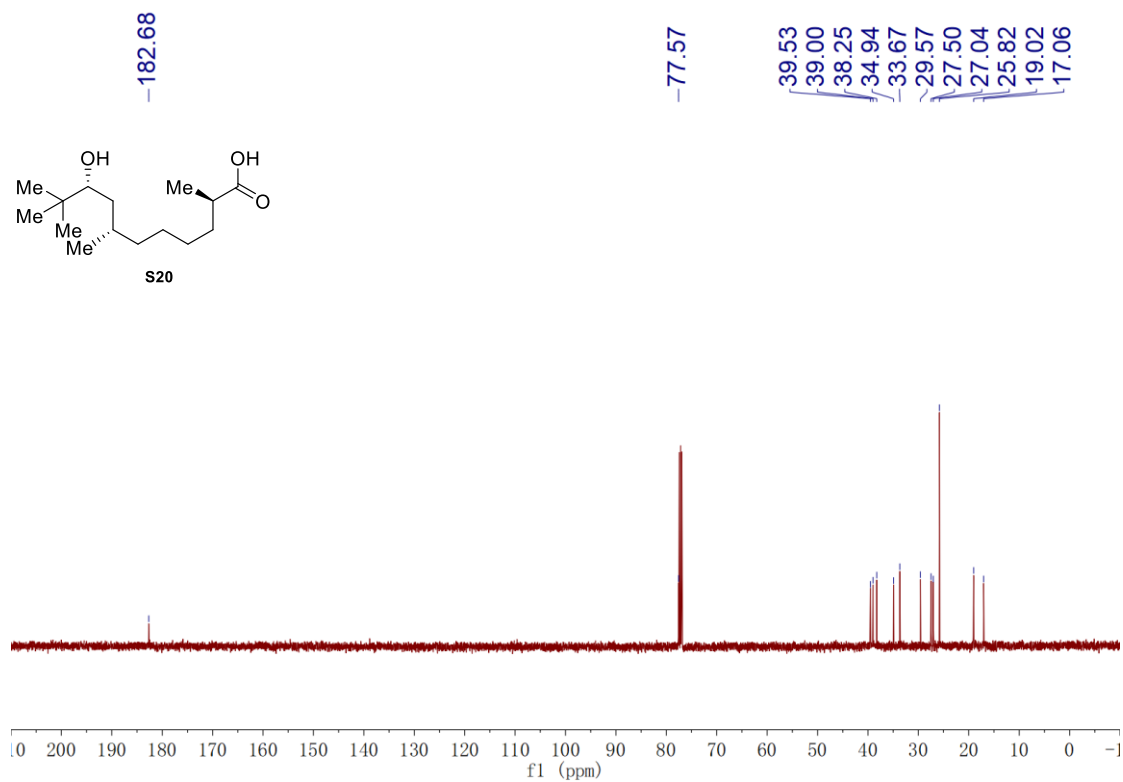

$^1\text{H}$  NMR Spectrum of **30** (400 MHz,  $\text{CDCl}_3$ )

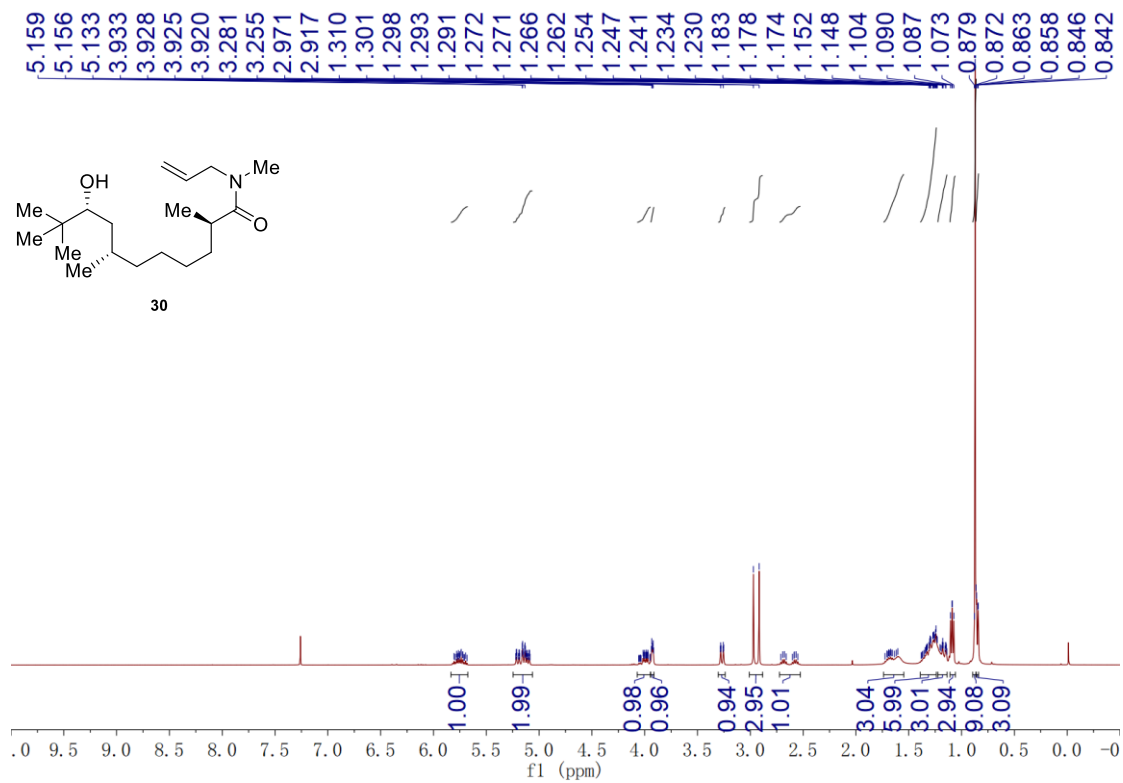

$^{13}\text{C}$  NMR Spectrum of **30** (100 MHz,  $\text{CDCl}_3$ )

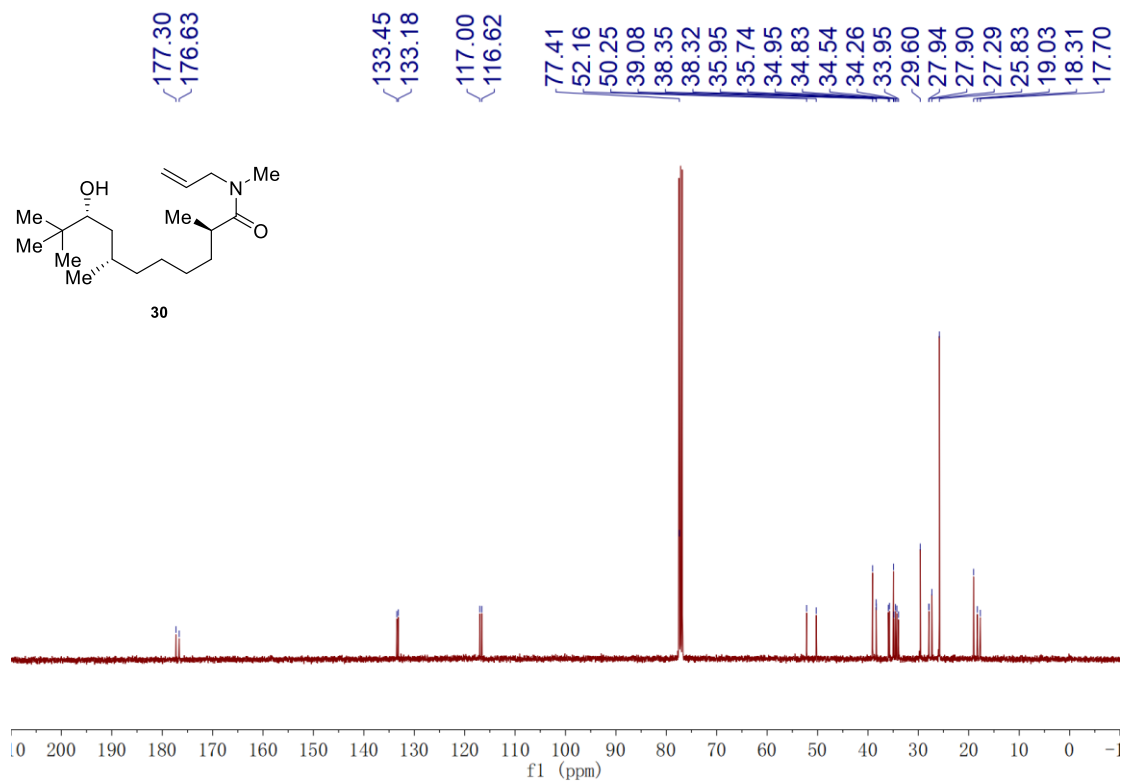

$^1\text{H}$  NMR Spectrum of **31** (400 MHz,  $\text{CDCl}_3$ )

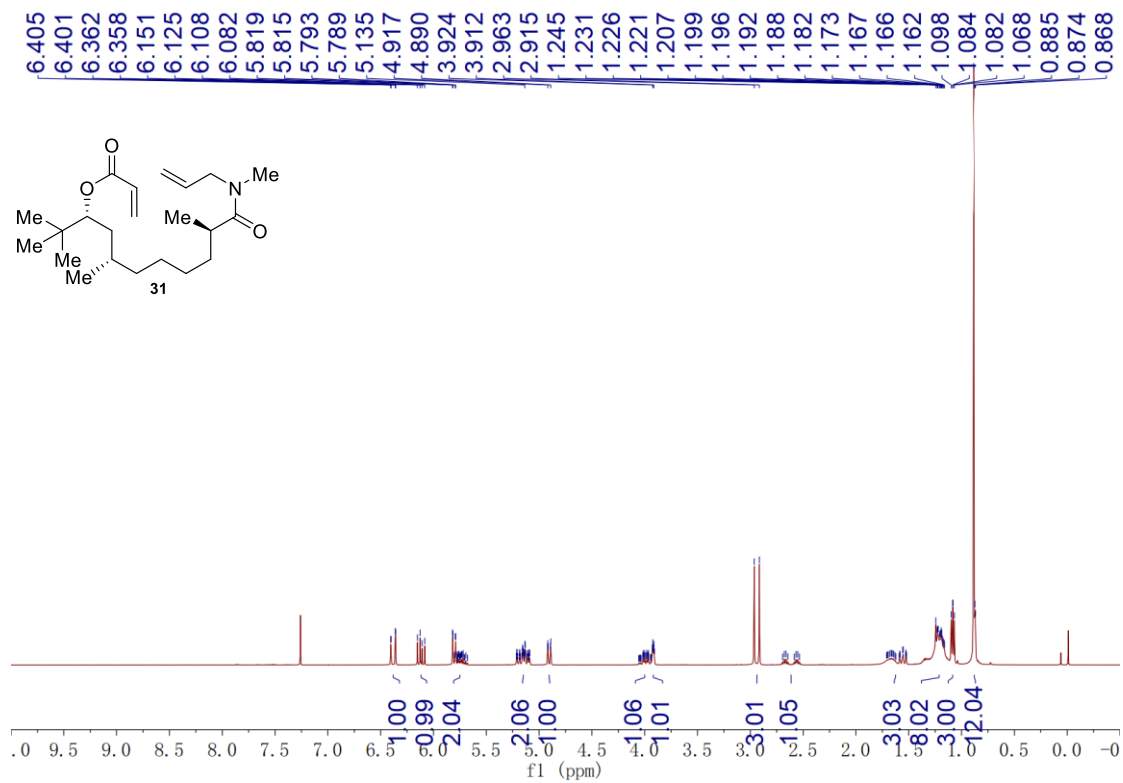

$^{13}\text{C}$  NMR Spectrum of **31** (100 MHz,  $\text{CDCl}_3$ )

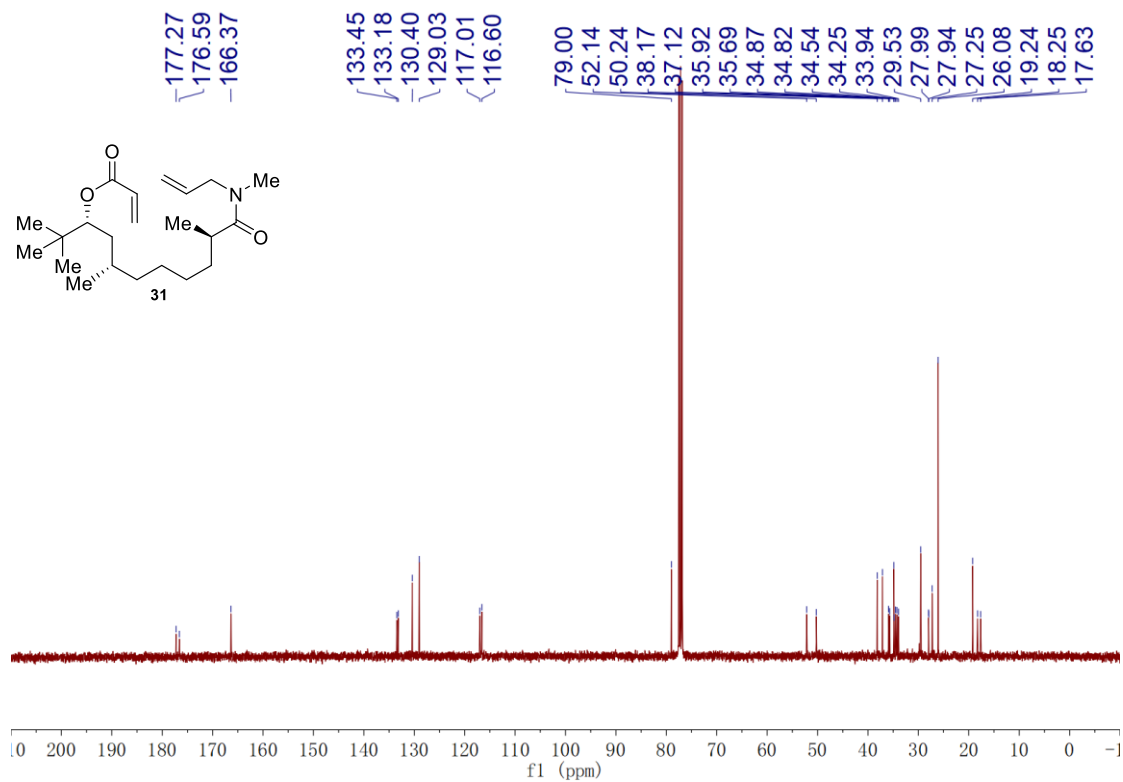



$^1\text{H}$  NMR Spectrum of (2*R*,7*S*,9*R*)-laingolide A (**1d**) (400 MHz,  $\text{CDCl}_3$ )

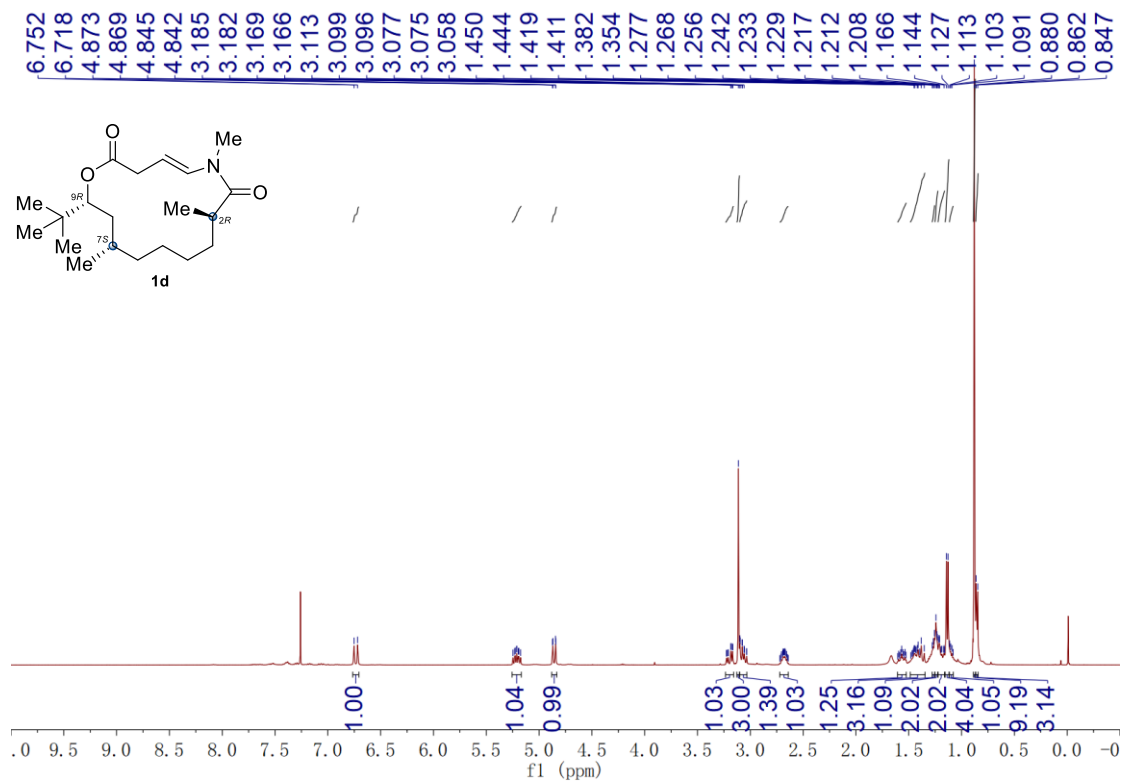

$^{13}\text{C}$  NMR Spectrum of (2*R*,7*S*,9*R*)-laingolide A (**1d**) (100 MHz,  $\text{CDCl}_3$ )

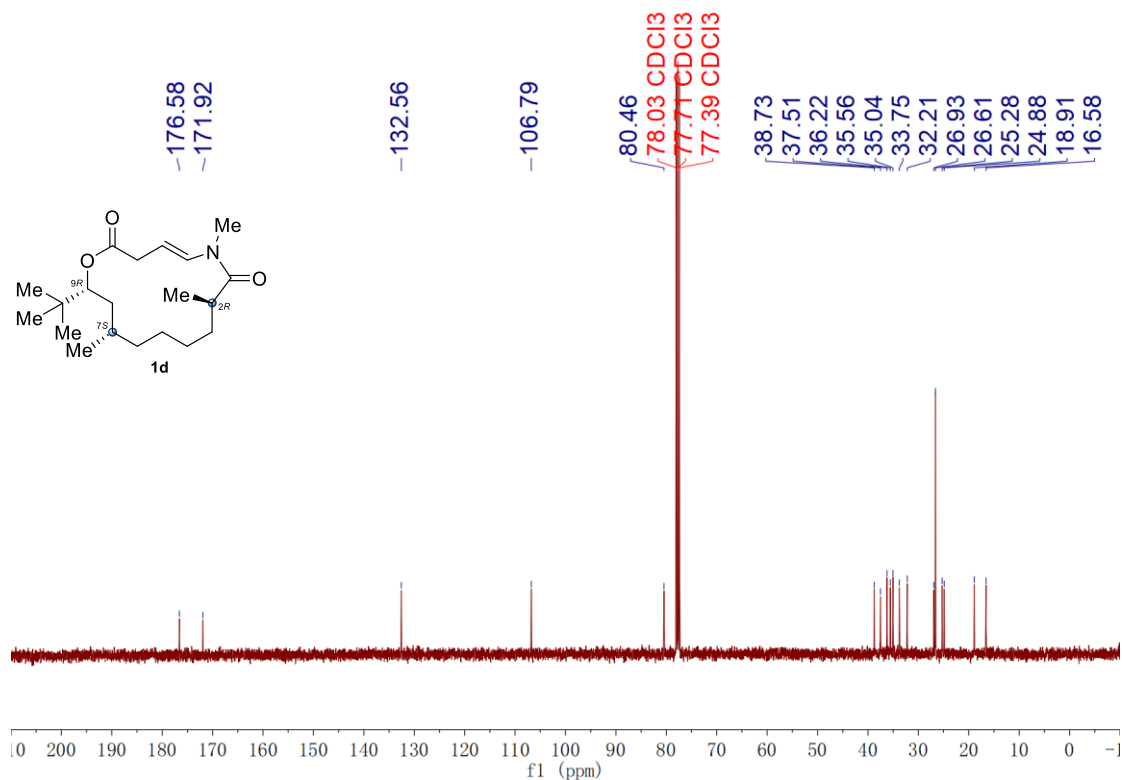

Supplement: s1 [file s1]
